# Supplementary material for: A care bundle including antenatal corticosteroids reduces preterm infant mortality in Tanzania a low resource country
Source: PLoS One. 2018 Mar 7;13(3):e0193146. doi: 10.1371/journal.pone.0193146 (PMC5841752; doi:10.1371/journal.pone.0193146)
Supplement: S1 Data File — (XLSX) [file pone.0193146.s001.xlsx]

## Sheet: all outcomes
Pre/Post Implementation	OUTCOME	Birth Weight	Gestational Age	Antenatal Cortico Steroids	Neonatal Antibiotics	INBORN VS OUTBORN	Maternal Antibiotics	INITIAL TEMPERATURE
post	SURVIVED	1500	35	YES	yes	referred	2	36.5
post	SURVIVED	2100	35	NO	yes	referred	2	36.9
post	SURVIVED	2200	35	YES	yes	referred	1
post	SURVIVED	2300	35	YES	yes	referred	2	36.9
post	SURVIVED	2000	35	NO	yes	referred	2
post	SURVIVED	2450	35	NO	yes	referred	1
post	SURVIVED	2050	35	NO	yes	referred	1
post	SURVIVED	2000	35	NO	yes	referred	2
post	SURVIVED	1400	35	YES	yes	referred	1
post	SURVIVED	1500	35	YES	yes	referred	1
post	SURVIVED	1300	35	YES	yes	inborn	1
post	SURVIVED	1800	35	YES	yes	referred	1
post	SURVIVED	2400	35	NO	yes	referred	1
post	SURVIVED	1800	35	NO	yes	referred	2	37.1
post	SURVIVED	1700	35	YES	yes	inborn	1
post	SURVIVED	2140	35	YES	yes	referred	1	37
post	SURVIVED	2300	35	YES	yes	inborn	1	36.6
post	SURVIVED	2100	35	YES	yes	inborn	1
post	SURVIVED	2300	35	YES	yes	inborn	1	37.1
post	SURVIVED	2300	35	YES	yes	referred	2	36.6
post	SURVIVED	2100	35	YES	yes	inborn	1
post	SURVIVED	1800	35	YES	yes	inborn	1
post	SURVIVED	2100	35	NO	yes	referred	1
post	SURVIVED	1900	35	YES	yes	referred	1	36.5
post	SURVIVED	2300	35	YES	yes	referred	1
post	SURVIVED	1700	35	YES	yes	referred	1
post	SURVIVED	1800	35	YES	yes	referred	1	36.2
post	SURVIVED	2200	35	YES	yes	referred	1
post	SURVIVED	1800	35	YES	yes	referred	1	36.3
post	SURVIVED	1900	35	YES	yes	referred	1	36.8
post	SURVIVED	2100	35	YES	yes	inborn	1	36.8
post	SURVIVED	1300	35	YES	yes	referred	1
post	SURVIVED	2000	35	NO	yes	referred	2
post	SURVIVED	2000	35	NO	yes	referred	2	36.5
post	SURVIVED	2000	35	YES	yes	inborn	1	36.9
post	SURVIVED	1700	35	YES	yes	inborn	1
post	SURVIVED	2500	35	YES	yes	referred	1
post	SURVIVED	2000	35	YES	yes	referred	1
post	SURVIVED	2200	35	YES	yes	referred	1
post	SURVIVED	1900	35	NO	yes	referred	1
post	SURVIVED	1500	35	YES	yes	inborn	1
post	SURVIVED	1900	35	YES	yes	referred	1
post	SURVIVED	2000	35	YES	yes	inborn	1
post	SURVIVED	2300	35	YES	yes	inborn	1
post	SURVIVED	2100	35	YES	yes	referred	2	36.7
post	SURVIVED	2200	35	YES	yes	referred	1
post	SURVIVED	1800	35	YES	yes	inborn	1
post	SURVIVED	1750	35	YES	yes	inborn	1	36.8
post	SURVIVED	1500	35	YES	yes	inborn	1
post	SURVIVED	1950	35	YES	yes	inborn	1
post	SURVIVED	1900	35	NO	yes	referred	2	36.8
post	SURVIVED	1600	35	YES	yes	inborn	1	36.3
post	SURVIVED	2000	35	YES	yes	referred	1
post	SURVIVED	1700	35	YES	yes	referred	1
post	SURVIVED	1800	35	YES	yes	referred	2	37.1
post	SURVIVED	1600	35	YES	yes	inborn	1	36.9
post	SURVIVED	2300	35	YES	yes	referred	2	36.4
post	SURVIVED	1750	35	YES	yes	referred	1
post	SURVIVED	2200	35	YES	yes	inborn	1
post	SURVIVED	1900	35	YES	yes	referred	2	36.9
post	SURVIVED	2400	35	YES	yes	referred	2	37.3
post	SURVIVED	1500	35	NO	yes	referred	1
post	SURVIVED	2000	35	YES	yes	inborn	1
post	SURVIVED	1750	35	YES	yes	referred	1
post	SURVIVED	2200	35	YES	yes	inborn	1
post	SURVIVED	2200	35	YES	yes	inborn	1
post	SURVIVED	2300	35	YES	yes	inborn	1
post	SURVIVED	2150	35	YES	yes	inborn	1	36.8
post	SURVIVED	1800	35	YES	yes	referred	1
post	SURVIVED	2000	35	YES	yes	referred	1
post	SURVIVED	1800	35	YES	yes	inborn	2	36.7
post	SURVIVED	1400	35	NO	yes	referred	2	36
post	SURVIVED	2000	35	NO	yes	referred	2	36.5
post	SURVIVED	2400	35	YES	yes	referred	1
post	SURVIVED	2000	35	YES	yes	referred	1
post	SURVIVED	2250	35	YES	yes	referred	1
post	SURVIVED	1000	35	YES	yes	inborn	1	36.5
post	SURVIVED	2200	35	YES	yes	inborn	1
post	SURVIVED	1950	35	YES	yes	inborn	1
post	SURVIVED	1900	35	YES	yes	referred	1
post	SURVIVED	2000	35	NO	yes	referred	2	36.9
post	SURVIVED	2000	35	YES	yes	referred	2	36.5
post	SURVIVED	2200	35	YES	yes	inborn	1
post	SURVIVED	2300	35	YES	yes	referred	1	37.4
post	SURVIVED	2100	35	NO	yes	referred	1
post	SURVIVED	2200	35	NO	yes	referred	1
post	SURVIVED	1900	35	YES	yes	referred	1
post	SURVIVED	2000	35	NO	yes	referred	1
post	SURVIVED	2000	35	YES	yes	inborn	1	36.9
post	SURVIVED	2300	35	NO	yes	referred	1
post	SURVIVED	2000	35	YES	yes	inborn	2	37.4
post	SURVIVED	1900	35	NO	yes	referred	1
post	SURVIVED	1700	35	NO	yes	referred	1
post	SURVIVED	2100	35	YES	yes	inborn	1
post	SURVIVED	2200	35	YES	yes	referred	2	36.8
post	SURVIVED	2000	35	YES	yes	referred	2	36.9
post	SURVIVED	2250	35	YES	yes	referred	1
post	SURVIVED	1900	35	YES	yes	referred	2	37.1
post	SURVIVED	1900	35	YES	yes	referred	2	37.1
post	SURVIVED	1900	35	YES	yes	inborn	1
post	SURVIVED	1900	35	YES	yes	inborn	1
post	SURVIVED	2300	35	YES	yes	referred	1
post	SURVIVED	1900	35	YES	no	referred	1
post	SURVIVED	2100	35	YES	yes	referred	1
post	SURVIVED	2000	35	YES	yes	referred	1
post	SURVIVED	1900	35	YES	yes	referred	2	36.5
post	SURVIVED	1600	35	YES	yes	referred	2
post	SURVIVED	1800	35	YES	yes	referred	2
post	SURVIVED	1900	35	YES	yes	referred	2	37.2
post	SURVIVED	1400	35	YES	yes	referred	2	36.7
post	SURVIVED	1400	35	YES	yes	referred	2	37.3
post	SURVIVED	1300	35	YES	yes	referred	2	36.7
post	SURVIVED	2100	35	YES	yes	referred	2	36.6
post	SURVIVED	2200	35	YES	yes	referred	1
post	SURVIVED	2100	35	YES	yes	inborn	2
post	SURVIVED	2000	36	YES	yes	referred	1
post	SURVIVED	1500	35	YES	yes	inborn	1
post	SURVIVED	2200	35	YES	yes	referred	1
post	SURVIVED	2350	36	YES	yes	referred	1
post	SURVIVED	1700	35	YES	yes	referred	1
post	SURVIVED	1800	35	YES	yes	referred	1
post	SURVIVED	1900	35	YES	yes	referred	2	37.4
post	SURVIVED	2100	35	YES	yes	inborn	2	36.6
post	SURVIVED	2000	35	YES	yes	referred	2	36.8
post	SURVIVED	1500	35	YES	yes	referred	2	36.5
post	SURVIVED	2000	35	YES	yes	referred	1
post	SURVIVED	1000	35	YES	yes	inborn	2
post	SURVIVED	2300	35	YES	yes	referred	1
post	SURVIVED	2300	35	YES	yes	referred	1
post	SURVIVED	2100	35	YES	yes	referred	1
post	SURVIVED	2000	35	NO	yes	referred	2	36.4
post	SURVIVED	1300	35	YES	yes	referred	1
post	SURVIVED	2200	35	YES	yes	referred	1
post	SURVIVED	2500	35	YES	yes	referred	2	36.9
post	SURVIVED	1700	35	YES	yes	referred	2	36.7
pre	SURVIVED	1500	26	NO	no	referred	2
pre	SURVIVED	1750	27	NO	no	inborn	2
pre	SURVIVED	1100	28	NO	no	inborn	2
pre	SURVIVED	2100	28	YES	yes	inborn	1
pre	SURVIVED	1600	28	YES	yes	referred	1	36
pre	SURVIVED	1150	28	NO	no	referred	2
pre	SURVIVED	1600	28	NO	no	referred	2
pre	SURVIVED	1600	28	NO	no	referred	2
pre	SURVIVED	1000	29	YES	no	inborn	1
pre	SURVIVED	1500	29	YES	yes	inborn	1
pre	SURVIVED	1100	29	YES	yes	referred	1
pre	SURVIVED	1600	29	NO	no	referred	2
pre	SURVIVED	1600	29	YES	yes	referred	1	36.5
pre	SURVIVED	1400	29	NO	no	inborn	2
pre	SURVIVED	2200	29	YES	yes	referred	1	36.2
pre	SURVIVED	1600	29	YES	yes	referred	1	36.1
pre	SURVIVED	2200	29	NO	no	inborn	2
pre	SURVIVED	1500	29	NO	no	referred	2
pre	SURVIVED	1650	28	NO	no	inborn	2
pre	SURVIVED	1500	28	NO	no	inborn	2
pre	SURVIVED	1600	29	YES	no	inborn	2
pre	SURVIVED	1800	29	YES	no	inborn	2
pre	SURVIVED	1400	28	YES	yes	inborn	2
pre	SURVIVED	1600	29	NO	no	inborn	2
pre	SURVIVED	1700	29	YES	yes	inborn	2
pre	SURVIVED	1550	28	NO	no	inborn	2
pre	SURVIVED	1000	28	NO	no	referred	1
pre	SURVIVED	1400	28	NO	no	referred	1
pre	SURVIVED	900	28	NO	no	inborn	2
pre	SURVIVED	1100	28	NO	no	inborn	2
pre	SURVIVED	1600	28	NO	no	referred	2
pre	SURVIVED	1700	28	NO	no	inborn	2
pre	SURVIVED	1850	28	NO	no	inborn	2
pre	SURVIVED	900	28	NO	no	inborn	2
pre	SURVIVED	1450	28	NO	no	inborn	1
pre	SURVIVED	1500	28	NO	no	inborn	2
pre	SURVIVED	1300	28	NO	no	referred	1
pre	SURVIVED	1500	28	NO	no	referred	1
pre	SURVIVED	1700	28	NO	no	referred	1
pre	SURVIVED	1200	28	NO	no	inborn	1
pre	SURVIVED	1300	28	NO	no	referred	2
pre	SURVIVED	1700	28	NO	no	referred	2
pre	SURVIVED	1700	28	NO	no	inborn	2
pre	SURVIVED	1900	28	YES	no	referred	2
pre	SURVIVED	1500	29	NO	no	inborn	2
pre	SURVIVED	1800	29	NO	no	inborn	2
pre	SURVIVED	1700	29	NO	no	inborn	2
pre	SURVIVED	1300	29	NO	no	inborn	2
pre	SURVIVED	1300	29	NO	no	referred	2
pre	SURVIVED	1650	29	NO	no	referred	2
pre	SURVIVED	1500	29	NO	no	referred	2
pre	SURVIVED	1300	29	NO	no	referred	2
pre	SURVIVED	1100	26	NO	no	inborn	2
pre	SURVIVED	2250	28	NO	no	referred	2
pre	SURVIVED	1300	28	NO	no	inborn	2
pre	SURVIVED	1200	28	YES	yes	inborn	1	35
pre	SURVIVED	1200	28	YES	yes	referred	1	36.5
pre	SURVIVED	1700	28	YES	yes	referred	1	36
pre	SURVIVED	3400	28	NO	no	referred	2
pre	SURVIVED	1600	29	NO	no	referred	2
pre	SURVIVED	1500	29	NO	no	referred	2
pre	SURVIVED	1800	29	NO	no	inborn	2
pre	SURVIVED	1700	29	NO	no	inborn	2
pre	SURVIVED	1600	29	NO	yes	inborn	2	35.9
pre	SURVIVED	1200	28	YES	no	inborn	2
pre	SURVIVED	1370	29	YES	yes	inborn	1	36.8
pre	SURVIVED	1700	29	YES	no	inborn	2
pre	SURVIVED	1900	29	YES	yes	inborn	1	36.4
pre	SURVIVED	1850	28	YES	no	inborn	2
pre	SURVIVED	1300	28	NO	no	inborn	2	36.2
pre	SURVIVED	1250	28	NO	no	inborn	2	36.2
pre	SURVIVED	1900	29	NO	no	inborn	2	36.2
pre	SURVIVED	1800	29	NO	yes	inborn	2	36.2
pre	SURVIVED	1300	29	YES	yes	inborn	2	36.6
pre	SURVIVED	1600	29	YES	yes	inborn	2	36.2
pre	SURVIVED	1600	29	NO	no	inborn	2
pre	SURVIVED	1500	29	NO	no	inborn	2	36.2
pre	SURVIVED	1450	28	NO	no	inborn	2
pre	SURVIVED	1800	28	NO	no	inborn	2	36.2
pre	SURVIVED	1400	29	YES	yes	inborn	2	36.2
pre	SURVIVED	1800	29	YES	no	inborn	2	36
pre	SURVIVED	1200	27	NO	no	inborn	2
pre	SURVIVED	2100	28	NO	no	inborn	2
pre	SURVIVED	1820	28	NO	yes	inborn	2	36
pre	SURVIVED	1350	28	NO	no	inborn	2
pre	SURVIVED	1540	28	NO	no	inborn	2
pre	SURVIVED	1620	29	NO	no		2
pre	SURVIVED	1670	29	NO	no	inborn	2
post	SURVIVED	860	28	YES	yes	referred	1	36.2
post	SURVIVED	950	28	YES	yes	referred	1	36.4
post	SURVIVED	900	28	NO	yes	referred	1	35.8
post	SURVIVED	850	28	YES	yes	inborn	1	35.9
post	SURVIVED	900	28	NO	yes	referred	1	36.1
post	SURVIVED	850	28	YES	yes	referred	1	37.2
post	SURVIVED	740	28	YES	yes	inborn	1	37.3
post	SURVIVED	900	28	YES	yes	referred	1	36.6
post	SURVIVED	900	29	NO	yes		1	35.9
post	SURVIVED	1200	29	YES	yes		1	35.9
post	SURVIVED	1260	29	YES	yes		1	36.6
post	SURVIVED	1000	25	NO	yes	referred	1	35
post	SURVIVED	1600	26	NO	yes	referred	1	35.8
post	SURVIVED	1200	28	NO	yes	inborn	1	35.7
post	SURVIVED	1200	28	NO	no	referred	2
post	SURVIVED	1900	29	YES	yes	inborn	1	36.1
post	SURVIVED	1200	29	YES	yes	inborn	1	36
post	SURVIVED	1100	29	YES	yes	inborn	1	36
post	SURVIVED	2000	29	YES	yes	inborn	1	36.2
post	SURVIVED	2000	29	NO	no	inborn	2
post	SURVIVED	1200	27	YES	yes	inborn	1	36.2
post	SURVIVED	1760	28	NO	yes	referred	2	36.1
post	SURVIVED	1800	28	YES	yes	inborn	2	36.3
post	SURVIVED	1300	28	YES	yes	inborn	1	37
post	SURVIVED	1150	28	YES	yes	referred	1	36
post	SURVIVED	1030	28	YES	yes	inborn	1	36.6
post	SURVIVED	1100	28	YES	yes	referred	1	36.1
post	SURVIVED	1300	28	YES	yes	inborn	1	36.4
post	SURVIVED	1400	28	YES	yes	inborn	1	36.3
post	SURVIVED	750	28	NO	no	referred	2	35.7
post	SURVIVED	1000	28	YES	yes	inborn	1	36.9
post	SURVIVED	900	28	NO	no	referred	2	36.3
post	SURVIVED	1200	28	YES	yes	referred	1	36.8
post	SURVIVED	2400	28	YES	yes	referred	1	36.6
post	SURVIVED	1700	28	NO	no	referred	1	36
post	SURVIVED	900	28	YES	yes	inborn	1	36.8
post	SURVIVED	450	28	YES	yes	inborn	1	36.8
post	SURVIVED	400	28	YES	yes	inborn	1	36.8
post	SURVIVED	1600	28	YES	yes	referred	1	36.6
post	SURVIVED	1100	28	YES	yes	inborn	1	36.8
post	SURVIVED	2080	28	NO	no	referred	1	35.7
post	SURVIVED	1500	28	YES	yes	referred	1	36.5
post	SURVIVED	1100	28	NO	no	referred	1
post	SURVIVED	1200	28	YES	yes	referred	1	36.6
post	SURVIVED	1600	28	NO	no	referred	1	36
post	SURVIVED	1200	28	YES	yes	referred	1	36.6
post	SURVIVED	700	28	YES	yes	inborn	1	36.8
post	SURVIVED	1700	28	YES	yes	inborn	1	36.8
post	SURVIVED	1400	28	NO	no	referred	2	36.4
post	SURVIVED	1300	28	YES	yes	inborn	1	36.9
post	SURVIVED	1000	28	NO	no	referred	1	36.4
post	SURVIVED	1600	28	YES	yes	inborn	1	36.8
post	SURVIVED	1400	28	YES	yes	inborn	1	36.9
post	SURVIVED	2050	28	YES	yes	inborn	1	36.8
post	SURVIVED	1550	28	YES	yes	referred	2	36.5
post	SURVIVED	950	28	NO	no	referred	2
post	SURVIVED	1100	28	YES	yes	inborn	1	36.8
post	SURVIVED	1700	28	YES	yes	inborn	1	36.9
post	SURVIVED	850	28	YES	yes	inborn	1	36.8
post	SURVIVED	1250	28	YES	yes	inborn	1	36.9
post	SURVIVED	1700	28	YES	yes	referred	1	36.5
post	SURVIVED	900	28	NO	no	referred	2
post	SURVIVED	1000	28	YES	yes	referred	1	37.3
post	SURVIVED	2000	28	YES	yes	inborn	1	36.8
post	SURVIVED	1000	28	YES	yes	inborn	1	36.8
post	SURVIVED	1750	29	NO	yes	inborn	2	36.5
post	SURVIVED	1625	29	YES	yes		1	37.2
post	SURVIVED	1600	29	YES	yes	inborn	1	36.3
post	SURVIVED	1300	29	NO	yes	referred	2	35.9
post	SURVIVED	1720	29	NO	yes	referred	2	35.2
post	SURVIVED	1710	29	YES	yes	inborn	1	36.4
post	SURVIVED	2000	29	NO	yes	referred	2	36.3
post	SURVIVED	1500	29	YES	yes	referred	1	36.5
post	SURVIVED	1800	29	YES	yes	referred	1	36.6
post	SURVIVED	1000	29	YES	yes	inborn	1	36.3
post	SURVIVED	2100	29	NO	yes	referred	2	36
post	SURVIVED	1700	29	YES	yes	inborn	1	36.7
post	SURVIVED	1350	29	YES	yes	referred	1	36.6
post	SURVIVED	2150	29	NO	yes	referred	1	36.2
post	SURVIVED	1400	29	YES	yes	referred	1	36.5
post	SURVIVED	1820	29	YES	yes	referred	1	36.4
post	SURVIVED	1300	29	NO	yes	referred	2	36
post	SURVIVED	1720	29	YES	yes	inborn	2	36.5
post	SURVIVED	1300	29	YES	yes	inborn	1	37
post	SURVIVED	1800	29	YES	yes	inborn	1	37
post	SURVIVED	1400	29	YES	yes	referred	1	36.5
post	SURVIVED	1500	29	YES	yes	referred	1	36.6
post	SURVIVED	1200	29	YES	yes	inborn	1	36.9
post	SURVIVED	1050	29	YES	yes	inborn	1	36.8
post	SURVIVED	2300	29	YES	yes	inborn	1	36.8
post	SURVIVED	1600	29	YES	yes	inborn	2	37.2
post	SURVIVED	2060	29	NO	no	referred	1	36
post	SURVIVED	1600	29	NO	no	referred	1	36
post	SURVIVED	1400	29	YES	yes	referred	1	36.8
post	SURVIVED	1800	29	NO	no	referred	2	36.4
post	SURVIVED	2200	29	YES	yes	inborn	1	36.8
post	SURVIVED	1360	29	NO	no	referred	2	36.4
post	SURVIVED	1200	29	YES	yes	referred	1	36.5
post	SURVIVED	1900	29	YES	yes	referred	1	36.8
post	SURVIVED	900	29	YES	yes	inborn	1	36.8
post	SURVIVED	1400	29	YES	yes	inborn	1	36.8
post	SURVIVED	2200	29	NO	no	referred	1
post	SURVIVED	1200	29	YES	yes	referred	1	36.5
post	SURVIVED	1200	29	NO	no	referred	2	36.4
post	SURVIVED	1350	29	NO	no	referred	1	36
post	SURVIVED	1000	29	NO	no	referred	2
post	SURVIVED	1200	29	YES	yes	inborn	1	36.9
post	SURVIVED	1200	29	NO	no	referred	1	36.4
post	SURVIVED	1400	29	NO	no	referred	1	36
post	SURVIVED	1200	29	YES	yes	referred	1	36.6
post	SURVIVED	2100	29	YES	yes	referred	1	36.7
post	SURVIVED	1400	29	NO	no	referred	2	36.4
post	SURVIVED	1700	27	NO	yes	referred	1	39
post	SURVIVED	3000	28	NO	no	referred	2
post	SURVIVED	3100	28	NO	no	inborn	2
post	SURVIVED	1800	28	NO	no	referred	2
post	SURVIVED	1700	28	YES	yes	referred	1	36
post	SURVIVED	1900	28	YES	yes	referred	1	35.5
post	SURVIVED	2200	28	YES	yes	referred	1	35.4
post	SURVIVED	1000	28	YES	yes	referred	1	36
post	SURVIVED	1400	28	NO	no	referred	2
post	SURVIVED	1150	28	YES	yes	referred	1	36
post	SURVIVED	1500	29	YES	yes	inborn	1	35.8
post	SURVIVED	3100	29	NO	no	referred	2
post	SURVIVED	1600	29	YES	yes	referred	1	36
post	SURVIVED	1500	29	YES	yes	referred	1	36.2
post	SURVIVED	1900	29	YES	yes	inborn	1	35.8
post	SURVIVED	3500	29	NO	no	referred	2
post	SURVIVED	1400	29	NO	yes	referred	1	35.7
post	SURVIVED	1200	29	NO	yes	inborn	1	35.5
post	SURVIVED	1100	29	YES	yes	inborn	1	36
post	SURVIVED	1250	29	YES	yes	referred	1	35.8
post	SURVIVED	1200	29	NO	yes	inborn	1	35
post	SURVIVED	1650	29	NO	no	inborn	2
post	SURVIVED	2000	29	YES	no	inborn	1	35.1
post	SURVIVED	1250	28	YES	no	inborn	2	36.3
post	SURVIVED	1300	29	NO	no	referred	2	36.3
post	SURVIVED	1900	29	YES	yes	inborn	2	36.5
post	SURVIVED	1050	29	YES	yes	inborn	2	36.3
post	SURVIVED	1300	28	YES	no	inborn	1	35.7
post	SURVIVED	1800	29	YES	no	referred	1	36.2
post	SURVIVED	1600	29	YES	yes	inborn	2	36.2
post	SURVIVED	1200	29	YES	yes	inborn	2	37
post	SURVIVED	1500	28	YES	yes	referred	2	37
post	SURVIVED	1400	29	YES	yes	inborn	2	36.4
post	SURVIVED	1350	28	YES	yes		1	35.9
post	SURVIVED	1000	28	YES	yes		1	36
post	SURVIVED	1900	29	YES	yes		2	36.8
post	SURVIVED	1700	29	YES	yes		2	36.3
post	SURVIVED	1500	29	NO	no		2	34.9
post	SURVIVED	1350	29	YES	yes		2	36
post	SURVIVED	1200	29	NO	no		2	36.1
post	SURVIVED	1700	29	NO	yes		2	35.5
post	SURVIVED	1650	28	YES	yes		2	36.6
post	SURVIVED	1100	28	YES	yes		2	36.2
post	SURVIVED	1900	28	YES	yes		2	36.7
post	SURVIVED	1800	29	YES	yes		1	36.5
post	SURVIVED	1400	29	YES	yes		1	36
post	SURVIVED	1500	28	YES	yes	referred	2	36.2
post	SURVIVED	1500	29	NO	no	inborn	2	36
post	SURVIVED	1800	29	NO	no	referred	2	36.4
post	SURVIVED	1400	28	NO	no		2	36.4
post	SURVIVED	1950	29	YES	no	inborn	2	36.2
post	SURVIVED	1700	29	YES	yes	referred	2	36
post	SURVIVED	1900	28	NO	yes		2	33
post	SURVIVED	1330	28	NO	yes	referred	2	35
post	SURVIVED		28	NO	no	inborn	1
post	SURVIVED	1540	28	YES	yes		1	36.7
post	SURVIVED	1950	28	NO	yes	inborn	2	39.2
post	SURVIVED	1160	29	NO	no	inborn	2
post	SURVIVED	900	27	NO	yes		2	35.2
post	SURVIVED	1480	27	NO	yes		2	36.1
post	SURVIVED	1420	28	YES	yes		1	36
post	SURVIVED	2260	29	NO	no		2
post	SURVIVED	1170	29	NO	yes		2	36.4
post	SURVIVED	2050	29	YES	yes	referred	2	37.3
post	SURVIVED	1900	28	YES	yes	referred	2
post	SURVIVED	1500	28	YES	yes	referred	1	35.9
post	SURVIVED	2000	28	YES	yes	referred	1
post	SURVIVED	2200	29	NO	yes	referred	1
post	SURVIVED	1200	29	YES	yes	referred	1	36.8
post	SURVIVED	1100	28	YES	yes	referred	2	36.7
post	SURVIVED	1400	28	YES	yes	referred	1
post	SURVIVED	1920	28	YES	yes	inborn	1	36.9
post	SURVIVED	2500	29	NO	yes	referred	1
post	SURVIVED	1300	29	YES	yes	inborn	1	36.8
post	SURVIVED	950	28	YES	yes	inborn	1	36.4
post	SURVIVED	1000	28	YES	yes	inborn	1	37.3
post	SURVIVED	1000	28	YES	yes	referred	1	36.8
post	SURVIVED	1400	29	YES	yes	inborn	1	36.6
post	SURVIVED	1050	28	NO	yes	referred	2	36.9
post	SURVIVED	2200	29	YES	yes	inborn	1	37.3
post	SURVIVED	1030	29	YES	yes	inborn	1
post	SURVIVED	1000	28	YES	yes	inborn	2	37.3
post	SURVIVED	600	29	NO	yes	referred	2	36.7
post	SURVIVED	1700	28	YES	yes	inborn	1
post	SURVIVED	1900	28	YES	yes	inborn	1	36.8
post	SURVIVED	1600	29	YES	yes	referred	1
post	SURVIVED	2050	29	NO	yes	referred	2	36.5
post	SURVIVED	1000	28	YES	yes	referred	1	37.3
post	SURVIVED	1200	29	YES	yes	referred	2	36.7
post	SURVIVED	1600	28	YES	yes	referred	1	37
post	SURVIVED	1000	28	YES	yes	inborn	1	36.9
post	SURVIVED	1500	28	YES	yes	referred	2	36.7
post	SURVIVED	1000	28	YES	yes	inborn	1
post	SURVIVED	1800	28	YES	yes	referred	2	36.9
post	SURVIVED	1400	28	YES	yes	referred	1	36.9
post	SURVIVED	1100	29	YES	yes	inborn	1
post	SURVIVED	1300	29	YES	yes	inborn	1
post	SURVIVED	1300	28	YES	yes	inborn	1
post	SURVIVED	1550	29	YES	yes	referred	1	37.4
post	SURVIVED	2100	29	YES	yes	inborn	1
post	SURVIVED	1900	29	YES	yes	referred	1
post	SURVIVED	900	28	YES	yes	inborn	1	36.3
post	SURVIVED	1300	28	YES	yes	referred	1
post	SURVIVED	1050	29	YES	yes	referred	2	36.8
post	SURVIVED	1000	28	YES	yes	inborn	1	37.3
post	SURVIVED	1000	29	YES	yes	referred	1	36.5
post	SURVIVED	1300	29	YES	yes	referred	1	36.8
post	SURVIVED	1200	28	YES	yes	referred	1
post	SURVIVED	2200	29	YES	yes	inborn	1	36.6
post	SURVIVED	1700	29	YES	yes	referred	1	36.8
post	SURVIVED	1000	28	YES	yes	inborn	1	36.9
post	SURVIVED	1900	29	YES	yes	inborn	1	36.4
post	SURVIVED	2100	29	YES	yes	inborn	1	37
post	SURVIVED	500	28	YES	yes	inborn	1	36.3
post	SURVIVED	1600	29	YES	yes	referred	2	35.9
post	SURVIVED	1880	29	YES	yes	referred	1	37.1
post	SURVIVED	1900	29	YES	yes	referred	2	36.8
post	SURVIVED	1800	28	YES	yes	referred	2	36.8
post	SURVIVED	1800	29	YES	yes	inborn	1
post	SURVIVED	1700	28	YES	yes	inborn	1
post	SURVIVED	1400	28	YES	yes	referred	2
post	SURVIVED	1600	28	YES	yes	inborn	1
post	SURVIVED	2000	29	YES	yes	referred	2	36.8
post	SURVIVED	1300	29	YES	yes	referred	2	36.6
post	SURVIVED	1400	29	YES	yes	referred	2	37.2
post	SURVIVED	1800	28	YES	yes	inborn	1	37.4
post	SURVIVED	2200	28	YES	yes	inborn	1	36.9
post	SURVIVED	900	29	YES	yes	referred	2
post	SURVIVED	900	29	YES	yes	referred	2	36.5
post	SURVIVED	1300	28	YES	yes	inborn	1
post	SURVIVED	2000	29	YES	yes	inborn	2	37.1
post	SURVIVED	1600	29	NO	yes	referred	2
post	SURVIVED	900	28	YES	yes	referred	2	36.4
post	SURVIVED	1100	29	YES	yes	inborn	2	37.3
post	SURVIVED	1800	28	YES	yes	inborn	1
post	SURVIVED	1650	29	NO	yes	referred	1
post	SURVIVED	900	29	YES	yes	inborn	1
post	SURVIVED	1200	29	YES	yes	inborn	1
post	SURVIVED	1100	29	YES	yes	inborn	2	36
post	SURVIVED	800	28	YES	yes	inborn	2	37.3
post	SURVIVED	1700	28	NO	yes	referred	1
post	SURVIVED	650	28	YES	yes	inborn	1	36.7
post	SURVIVED	2400	29	YES	yes	inborn	1
post	SURVIVED	1370	28	YES	yes	referred	2	36.9
post	SURVIVED	1100	28	YES	yes	referred	2	37.3
post	SURVIVED	1600	28	YES	yes	referred	2	36.9
post	SURVIVED	900	28	YES	yes	inborn	2
post	SURVIVED	1400	28	YES	yes	inborn	2
post	SURVIVED	1700	29	NO	yes	referred	2
post	SURVIVED	1700	28	YES	yes	referred	2
post	SURVIVED	1000	28	YES	yes	inborn	2	36.5
post	SURVIVED	1000	28	YES	yes	inborn	2	36.8
post	SURVIVED	2000	28	YES	yes	referred	1
post	SURVIVED	1250	28	YES	yes	referred	1
post	SURVIVED	900	28	YES	yes	referred	2	37.2
post	SURVIVED	1650	28	YES	yes	inborn	2	36.9
post	SURVIVED	1400	28	YES	yes	referred	1
post	SURVIVED	1000	28	YES	yes	inborn	1
post	SURVIVED	1000	28	YES	yes	inborn	1
post	SURVIVED	1000	29	YES	yes	referred	1
post	SURVIVED	1200	28	YES	yes	referred	1
post	SURVIVED	1500	29	YES	yes	referred	1
post	SURVIVED	900	28	YES	yes	referred	2	36.8
post	SURVIVED	2100	28	YES	yes	referred	1
post	SURVIVED	2200	29	YES	yes	inborn	2	37.1
post	SURVIVED	1200	28	YES	yes	inborn	1
post	SURVIVED	1200	28	YES	yes	inborn	1
post	SURVIVED	700	28	YES	yes	inborn	1
post	SURVIVED	800	28	YES	yes	inborn	1	36.7
post	SURVIVED	990	29	YES	yes	inborn	1
post	SURVIVED	2200	28	NO	yes	referred	2
post	SURVIVED	1900	28	YES	yes	referred	1
post	SURVIVED	1100	28	NO	yes	referred	2	36.4
post	SURVIVED	1050	28	YES	yes	inborn	1	37.4
post	SURVIVED	1000	29	YES	yes	inborn	1	36.8
post	SURVIVED	1200	27	YES	yes	inborn	1	35.6
post	SURVIVED	1100	28	NO	yes	referred	1	35.7
post	SURVIVED	1000	28	NO	yes	referred	1	35.6
post	SURVIVED	1000	28	NO	yes	referred	1	35.6
post	SURVIVED	1400	28	YES	yes	inborn	2
post	SURVIVED	1300	28	YES	yes	inborn	1	36
post	SURVIVED	1300	28	YES	yes	referred	1	35.5
post	SURVIVED	1500	29	YES	yes	inborn	1	36
post	SURVIVED	1700	29	YES	yes	inborn	1	36
post	SURVIVED	1200	29	NO	no	inborn	2
post	SURVIVED	1900	29	YES	yes	inborn	1	35.9
post	SURVIVED	1400	29	YES	yes	inborn	1	36
post	SURVIVED	1150	29	YES	yes	inborn	1	35.8
post	SURVIVED	1600	29	YES	yes	inborn	1	36.2
post	SURVIVED	1700	29	YES	yes	inborn	1	36
post	SURVIVED	900	27	NO	no	inborn	2	37
post	SURVIVED	1400	28	YES	no	inborn	1	35.8
post	SURVIVED	1500	28	YES	yes	inborn	1	36
post	SURVIVED	1300	28	YES	no	inborn	1	36
post	SURVIVED	1400	28	YES	yes	inborn	2	37
post	SURVIVED	1350	28	YES	yes	inborn	1	37
post	SURVIVED	1250	28	YES	yes	inborn	1	37
post	SURVIVED	1200	28	NO	no	inborn	2	36.2
post	SURVIVED	1700	28	YES	yes	inborn	1	36.2
post	SURVIVED	1600	28	YES	yes	inborn	1	36
post	SURVIVED	1700	28	NO	no	inborn	2	36.9
post	SURVIVED	1700	29	NO	no	inborn	2	35.8
post	SURVIVED	1800	29	YES	yes	inborn	2	37
post	SURVIVED	1200	29	YES	yes	inborn	2	36.3
post	SURVIVED	1300	29	YES	yes	inborn	2	37
post	SURVIVED	1600	29	YES	yes	inborn	2	36.7
post	SURVIVED	1100	29	YES	yes	inborn	2	36.6
post	SURVIVED	1200	29	YES	yes	inborn	2	36.7
post	SURVIVED	1700	29	YES	no	inborn	2	37
post	SURVIVED	1400	29	YES	yes	inborn	1	36.6
post	SURVIVED	1500	29	YES	yes	inborn	2	36.2
post	SURVIVED	1600	29	YES	yes	inborn	2	36
post	SURVIVED	1600	29	YES	yes	inborn	2	35.8
post	SURVIVED	1600	29	YES	yes	inborn	2	36
post	SURVIVED	1850	29	YES	yes	inborn	1	36.2
post	SURVIVED	1500	29	YES	yes	inborn	1	36.3
post	SURVIVED	1600	29	YES	yes	inborn	1	36.8
post	SURVIVED	1300	29	YES	yes	inborn	1	36
post	SURVIVED	1700	29	NO	no	inborn	2	36.1
post	SURVIVED	1650	29	YES	yes	inborn	1	36
post	SURVIVED	1700	29	YES	yes	inborn	1	36
post	SURVIVED	1300	29	YES	yes	inborn	1	37
post	SURVIVED	1720	29	NO	no	inborn	2	36
post	SURVIVED	1950	29	YES	yes	referred	1	36
pre	SURVIVED	1600	30	YES	no	referred	1
pre	SURVIVED	1400	30	NO	no	referred	2
pre	SURVIVED	1350	30	NO	no	referred	2
pre	SURVIVED	3200	30	NO	no	referred	2
pre	SURVIVED	1500	30	YES	yes	inborn	1
pre	SURVIVED	1650	30	YES	yes	inborn	1	36.8
pre	SURVIVED	1600	30	YES	yes	inborn	1	36
pre	SURVIVED	1200	30	YES	yes	inborn	1	35
pre	SURVIVED	1500	30	YES	yes	inborn	1	36.4
pre	SURVIVED	2300	30	NO	no	inborn	2
pre	SURVIVED	1400	30	NO	no	referred	2
pre	SURVIVED	1850	30	YES	yes	referred	1	35.5
pre	SURVIVED	1900	30	YES	yes	inborn	1
pre	SURVIVED	1700	30	YES	yes	referred	1	36
pre	SURVIVED	2900	30	NO	no	inborn	2
pre	SURVIVED	1300	30	NO	no	inborn	2
pre	SURVIVED	1800	30	NO	no	inborn	2
pre	SURVIVED	1800	30	NO	no	inborn	2
pre	SURVIVED	1500	30	YES	no	inborn	2
pre	SURVIVED	1600	30	NO	no	inborn	2
pre	SURVIVED	1800	30	NO	no	inborn	2
pre	SURVIVED	1900	30	NO	no	inborn	2
pre	SURVIVED	1800	30	NO	no	inborn	2
pre	SURVIVED	1300	30	NO	no	inborn	2
pre	SURVIVED	1800	30	NO	yes	inborn	2
pre	SURVIVED	1800	30	NO	no	inborn	2
pre	SURVIVED	1250	30	NO	no	inborn	2
pre	SURVIVED	1800	30	YES	no	inborn	1
pre	SURVIVED	1000	30	NO	no	inborn	2
pre	SURVIVED	1800	30	NO	no	referred	1
pre	SURVIVED	1100	30	NO	no	referred	1
pre	SURVIVED	1800	30	NO	no	referred	2
pre	SURVIVED	2400	30	YES	yes	referred	2
pre	SURVIVED	1200	30	NO	no	inborn	2
pre	SURVIVED	1900	30	YES	no	inborn	2
pre	SURVIVED	1950	30	YES	no	referred	2
pre	SURVIVED	1900	30	YES	no	inborn	2
pre	SURVIVED	1300	30	NO	no	referred	1
pre	SURVIVED	1200	30	NO	no	referred	1
pre	SURVIVED	1800	30	NO	no	inborn	2
pre	SURVIVED	1450	30	NO	no	referred	2
pre	SURVIVED	1300	30	NO	no	referred	2
pre	SURVIVED	1900	30	YES	no	referred	1
pre	SURVIVED	1600	30	NO	no	referred	2
pre	SURVIVED	1500	30	NO	no	referred	2
pre	SURVIVED	1200	30	NO	no	referred	1
pre	SURVIVED	1000	30	NO	no	inborn	1
pre	SURVIVED	1800	30	NO	no	referred	1
pre	SURVIVED	1900	30	YES	no	inborn	2
pre	SURVIVED	1200	30	NO	no	referred	1
pre	SURVIVED	1900	30	YES	no	inborn	2
pre	SURVIVED	1300	30	NO	no	referred	2
pre	SURVIVED	1500	30	NO	no	referred	1
pre	SURVIVED	1700	30	NO	no	referred	2
pre	SURVIVED	1800	30	NO	no	referred	1
pre	SURVIVED	1150	30	YES	yes	inborn	1	35.5
pre	SURVIVED	1200	30	YES	yes	inborn	1	35.6
pre	SURVIVED	1750	30	YES	no	referred	2
pre	SURVIVED	2000	30	NO	no	inborn	2
pre	SURVIVED	1600	30	YES	no	inborn	2	36.2
pre	SURVIVED	2000	30	YES	yes	referred	1	36
pre	SURVIVED	1450	30	YES	no	inborn	2
pre	SURVIVED	1800	30	YES	yes	inborn	2	36.2
pre	SURVIVED	1400	30	NO	no	referred	2	36.8
pre	SURVIVED	1400	30	NO	no	inborn	2	36.2
pre	SURVIVED	1500	30	NO	no	inborn	2
pre	SURVIVED	1200	30	NO	no	inborn	2	36.2
pre	SURVIVED	1300	30	NO	no	inborn	2	36
pre	SURVIVED	1600	30	NO	no	inborn	2	36
pre	SURVIVED	1800	30	YES	yes	inborn	1	36.9
pre	SURVIVED	1570	30	YES	yes	inborn	2	36.7
pre	SURVIVED	1200	30	YES	yes	inborn	2	36.2
pre	SURVIVED	1300	30	NO	yes	inborn	2	36
pre	SURVIVED	1550	30	YES	yes	inborn	1	36.2
pre	SURVIVED	1700	30	NO	yes	inborn	1	36
pre	SURVIVED	1300	30	NO	no	inborn	2
pre	SURVIVED	1700	30	YES	yes	inborn	2	36.3
pre	SURVIVED	1300	30	NO	no	inborn	2	35.8
pre	SURVIVED	1600	30	NO	no	inborn	2	36.2
pre	SURVIVED	1850	30	NO	no	inborn	2
pre	SURVIVED	1950	30	NO	no	inborn	2
pre	SURVIVED	1850	30	NO	no	inborn	2
pre	SURVIVED	1900	30	NO	no	inborn	2
pre	SURVIVED	1950	30	NO	no	inborn	2
pre	SURVIVED	1600	30	NO	no	inborn	2
pre	SURVIVED	3000	30	NO	no	inborn	2	36.6
pre	SURVIVED	1600	30	YES	yes	inborn	2	36.2
pre	SURVIVED	1750	30	NO	no	inborn	2	36.2
pre	SURVIVED	1800	30	YES	no	inborn	2	36.2
pre	SURVIVED	1800	30	YES	yes	inborn	2	36.2
pre	SURVIVED	1400	30	YES	no	inborn	1	35.1
pre	SURVIVED	1300	30	NO	no	inborn	1	36.8
pre	SURVIVED	1400	30	NO	no	inborn	2	36.2
pre	SURVIVED	1620	30	NO	no	inborn	2
pre	SURVIVED	1630	30	NO	yes	inborn	2
pre	SURVIVED	1050	30	NO	yes	inborn	1	33
pre	SURVIVED	2400	30	NO	no	inborn	2
post	SURVIVED	1300	30	NO	yes		1	37.2
post	SURVIVED	1000	30	YES	yes		1	36.5
post	SURVIVED	900	30	YES	yes	referred	1	37.3
post	SURVIVED	1000	30	NO	yes		1	36.6
post	SURVIVED	1350	30	NO	yes		1	35.9
post	SURVIVED	1800	30	NO	yes	referred	1	36.2
post	SURVIVED	1300	30	YES	yes	referred	1	37.2
post	SURVIVED	1000	30	YES	yes	referred	1	36
post	SURVIVED	1000	30	YES	yes	referred	1	35.6
post	SURVIVED	1000	30	YES	yes	referred	1	36.2
post	SURVIVED	1300	30	YES	yes	referred	1	37.2
post	SURVIVED	1200	30	YES	yes	inborn	1	36.9
post	SURVIVED	1800	30	NO	no	referred	2
post	SURVIVED	1500	30	NO	yes	referred	1	36
post	SURVIVED	2200	30	NO	no	inborn	2
post	SURVIVED	1600	30	YES	yes	inborn	1	36.2
post	SURVIVED	1700	30	NO	yes	referred	1	35.8
post	SURVIVED	2400	30	YES	yes	referred	1	36
post	SURVIVED	1000	30	YES	yes	referred	1	36
post	SURVIVED	2150	30	NO	yes	inborn	1
post	SURVIVED	2200	30	NO	no	inborn	2
post	SURVIVED	1450	30	YES	yes	referred	1	36.6
post	SURVIVED	1350	30	YES	yes	referred	1	37.1
post	SURVIVED	2200	30	YES	yes	referred	2	36.6
post	SURVIVED	1300	30	YES	yes	inborn	1	37.2
post	SURVIVED	1500	30	NO	yes	referred	2	36.4
post	SURVIVED	2230	30	NO	yes	referred	1	35.9
post	SURVIVED	1440	30	YES	yes	inborn	1	37.3
post	SURVIVED	1900	30	NO	yes	inborn	2	36.8
post	SURVIVED	2000	30	YES	yes	referred	1	36.7
post	SURVIVED	2100	30	YES	yes	referred	1	36.9
post	SURVIVED	1400	30	NO	yes	referred	1	36
post	SURVIVED	1300	30	NO	yes	referred	1	36.2
post	SURVIVED	1900	30	YES	yes	inborn	1	36.9
post	SURVIVED	1300	30	NO	yes	referred	1	35.7
post	SURVIVED	1650	30	YES	yes	inborn	1	35.9
post	SURVIVED	1700	30	YES	yes		1	37
post	SURVIVED	1400	30	NO	yes	inborn	2	35.9
post	SURVIVED	1800	30	YES	yes	inborn	1	36.6
post	SURVIVED	2000	30	YES	yes	referred	1	36.5
post	SURVIVED	1500	30	YES	yes	referred	1	37
post	SURVIVED	1500	30	YES	yes	referred	1	37
post	SURVIVED	1700	30	YES	yes	inborn	1	36.9
post	SURVIVED	1500	30	YES	yes	inborn	1	37
post	SURVIVED	1500	30	YES	yes	referred	1	36.2
post	SURVIVED	2000	30	YES	yes	referred	1	37.3
post	SURVIVED	2150	30	YES	yes	referred	2	36.3
post	SURVIVED	2130	30	YES	yes	referred	1	36.6
post	SURVIVED	1200	30	YES	yes	referred	1	36.4
post	SURVIVED	1870	30	NO	yes	referred	2	36.3
post	SURVIVED	1630	30	NO	yes	referred	2	35.9
post	SURVIVED	1800	30	NO	yes	referred	1	36.3
post	SURVIVED	1600	30	YES	yes	inborn	1	37.2
post	SURVIVED	1350	30	NO	yes	referred	2	36.2
post	SURVIVED	2350	30	YES	yes	referred	2	36.8
post	SURVIVED	1500	30	YES	yes	referred	2	36
post	SURVIVED	1700	30	NO	yes	referred	2	36.1
post	SURVIVED	1660	30	YES	yes	inborn	2	36.2
post	SURVIVED	1700	30	YES	yes	inborn	1	36.4
post	SURVIVED	1740	30	NO	yes	referred	1	36.1
post	SURVIVED	1400	30	NO	yes	referred	2	36
post	SURVIVED	1500	30	YES	yes	referred	1	36.2
post	SURVIVED	1700	30	YES	yes	inborn	1	36.6
post	SURVIVED	1820	30	NO	yes	referred	2	36.3
post	SURVIVED	1900	30	NO	yes	referred	2	36.4
post	SURVIVED	1600	30	YES	yes	inborn	1	36.8
post	SURVIVED	1700	30	NO	yes	inborn	2	36.2
post	SURVIVED	1400	30	YES	yes	referred	1	36.1
post	SURVIVED	1700	30	NO	yes	inborn	2	36.5
post	SURVIVED	1750	30	YES	yes	referred	1	37.1
post	SURVIVED	2300	30	YES	yes	referred	1	36.3
post	SURVIVED	1450	30	YES	yes	referred	2	36.6
post	SURVIVED	1300	30	YES	yes	referred	1	36
post	SURVIVED	1900	30	YES	yes	referred	2	36.1
post	SURVIVED	1250	30	YES	yes	referred	1	36.6
post	SURVIVED	1300	30	YES	yes	referred	1	36.6
post	SURVIVED	1230	30	YES	yes	referred	1	36.6
post	SURVIVED	1840	30	YES	yes	referred	1	36.6
post	SURVIVED	2000	30	NO	no	referred	1
post	SURVIVED	2100	30	NO	no	referred	2	35.8
post	SURVIVED	1350	30	YES	yes	referred	1	36.7
post	SURVIVED	1180	30	YES	yes	inborn	1	37.1
post	SURVIVED	1800	30	YES	yes	inborn	1	37
post	SURVIVED	1100	30	NO	no	referred	1	36.1
post	SURVIVED	1600	30	NO	no	referred	1	36
post	SURVIVED	2050	30	NO	no	referred	2	36.3
post	SURVIVED	2050	30	NO	no	referred	2	36.3
post	SURVIVED	1600	30	NO	no	referred	1	36.1
post	SURVIVED	2060	30	NO	no	referred	1	36
post	SURVIVED	1500	30	NO	no	inborn	2	36.3
post	SURVIVED	2200	30	YES	yes	referred	1	36.5
post	SURVIVED	1300	30	YES	yes	inborn	1	37.1
post	SURVIVED	2050	30	YES	yes	inborn	1	37.1
post	SURVIVED	2100	30	YES	yes	inborn	1	37.1
post	SURVIVED	1600	30	YES	yes	inborn	1	37
post	SURVIVED	2300	30	YES	yes	inborn	1	36.9
post	SURVIVED	1900	30	YES	yes	referred	1	36.6
post	SURVIVED	1900	30	NO	no	referred	1	36.1
post	SURVIVED	1800	30	YES	yes	inborn	1	36.9
post	SURVIVED	2050	30	NO	no	referred	1	36
post	SURVIVED	2200	30	NO	no	referred	1	35.9
post	SURVIVED	2000	30	NO	no	referred	1	36.4
post	SURVIVED	1400	30	YES	yes	referred	1	36.5
post	SURVIVED	1700	30	NO	no	referred	1	35.9
post	SURVIVED	1700	30	NO	no	referred	2	36.4
post	SURVIVED	1400	30	NO	no	referred	1	36.1
post	SURVIVED	1600	30	YES	yes	inborn	1	37.6
post	SURVIVED	2200	30	NO	no	referred	1	36.1
post	SURVIVED	1800	30	NO	no	referred	1	35.8
post	SURVIVED	1500	30	YES	yes	referred	1	36.6
post	SURVIVED	1300	30	YES	yes	inborn	1	36.8
post	SURVIVED	1300	30	YES	yes	inborn	1	37.2
post	SURVIVED	1400	30	YES	yes	referred	1	36.8
post	SURVIVED	2000	30	YES	yes	inborn	1	36.9
post	SURVIVED	1400	30	YES	yes	inborn	1	36.8
post	SURVIVED	900	30	YES	yes	referred	1	36.6
post	SURVIVED	1400	30	YES	yes	inborn	1	36.9
post	SURVIVED	2200	30	YES	yes	inborn	1	36.8
post	SURVIVED	1300	30	YES	yes	inborn	1	37.2
post	SURVIVED	2100	30	YES	yes	inborn	1	36.9
post	SURVIVED	1400	30	YES	yes	referred	1	36.7
post	SURVIVED	1400	30	YES	yes	inborn	1	37.1
post	SURVIVED	1500	30	YES	yes	inborn	1	36.9
post	SURVIVED	1600	30	YES	yes	inborn	1	36.9
post	SURVIVED	1500	30	YES	yes	inborn	1	36.9
post	SURVIVED	1200	30	YES	yes	referred	1	36.7
post	SURVIVED	2100	30	YES	yes	inborn	1	36.9
post	SURVIVED	1900	30	YES	yes	referred	1	36.5
post	SURVIVED	1400	30	YES	yes	referred	1	36.7
post	SURVIVED	1500	30	YES	yes	referred	1	36.6
post	SURVIVED	1200	30	NO	no	referred	2	36.4
post	SURVIVED	1200	30	YES	yes	inborn	1	37.2
post	SURVIVED	1950	30	YES	yes	inborn	1	35.9
post	SURVIVED	1900	30	NO	no	inborn	2
post	SURVIVED	2000	30	NO	yes	referred	1	35.8
post	SURVIVED	1850	30	NO	yes	inborn	1	35
post	SURVIVED	1600	30	YES	yes	inborn	1	35.9
post	SURVIVED	2400	30	YES	yes	referred	1	36.2
post	SURVIVED	1550	30	YES	yes	inborn	1	36
post	SURVIVED	1100	30	YES	yes	inborn	1	36.1
post	SURVIVED	1500	30	YES	yes	inborn	1	36
post	SURVIVED	1300	30	YES	yes	referred	1	35.8
post	SURVIVED	1450	30	YES	yes	inborn	1	35.9
post	SURVIVED	1300	30	NO	no	referred	2
post	SURVIVED	2100	30	NO	yes	referred	1	35.5
post	SURVIVED	1500	30	NO	yes	referred	1	35.4
post	SURVIVED	1200	30	YES	yes	inborn	1	36
post	SURVIVED	1900	30	NO	yes	inborn	1	35.5
post	SURVIVED	2000	30	NO	yes	inborn	1	35.9
post	SURVIVED	1500	30	NO	yes		2	36
post	SURVIVED	1900	30	YES	yes	inborn	2	36.1
post	SURVIVED	1850	30	YES	yes	referred	1	36.4
post	SURVIVED	1700	30	NO	no	inborn	2	35.2
post	SURVIVED	1900	30	NO	no	inborn	2	36.1
post	SURVIVED	1650	30	NO	no	inborn	2	36
post	SURVIVED	1850	30	YES	yes	inborn	2	35.9
post	SURVIVED	1750	30	YES	no	inborn	2	36.2
post	SURVIVED	1800	30	NO	no	inborn	2	36.5
post	SURVIVED	1600	30	YES	no	inborn	2	36.2
post	SURVIVED	1850	30	YES	yes	inborn	2	35.4
post	SURVIVED	1800	30	YES	no	inborn	1	36.4
post	SURVIVED	1900	30	YES	no	inborn	2	36.1
post	SURVIVED	1700	30	NO	no	inborn	2	36.6
post	SURVIVED	1800	30	YES	no	inborn	2	36
post	SURVIVED	1700	30	YES	yes	inborn	2	36.4
post	SURVIVED	1700	30	YES	yes	inborn	2	37
post	SURVIVED	1900	30	YES	yes	inborn	2	36
post	SURVIVED	1500	30	YES	yes	inborn	2	37
post	SURVIVED	1500	30	YES	yes	inborn	2	36
post	SURVIVED	1750	30	NO	no	inborn	2	36.4
post	SURVIVED	1300	30	YES	yes	inborn	1	36.8
post	SURVIVED	1400	30	YES	yes	inborn	2	36.3
post	SURVIVED	1950	30	NO	yes	referred	2	36.2
post	SURVIVED	1400	30	NO	no	inborn	2	36.2
post	SURVIVED	1700	30	YES	yes	inborn	2	36.2
post	SURVIVED	800	30	NO	yes	inborn	2	36.7
post	SURVIVED	1450	30	NO	yes	inborn	2	36.6
post	SURVIVED	1700	30	YES	yes	inborn	1	36.4
post	SURVIVED	1700	30	YES	yes	inborn	2	36.2
post	SURVIVED	1950	30	YES	yes		1	36.4
post	SURVIVED	1700	30	NO	no		2	36.6
post	SURVIVED	1900	30	YES	yes		2	36.7
post	SURVIVED	1650	30	YES	yes		2	37
post	SURVIVED	1900	30	YES	yes		2	35.8
post	SURVIVED	1200	30	YES	yes		2	35.9
post	SURVIVED	1900	30	NO	no		2	36
post	SURVIVED	1600	30	YES	yes		2	35.1
post	SURVIVED	1500	30	NO	no		2	36.6
post	SURVIVED	1850	30	YES	yes		2	36
post	SURVIVED	1900	30	NO	no		2	36.2
post	SURVIVED	1600	30	YES	yes		2	36
post	SURVIVED	1650	30	YES	yes		2	36.6
post	SURVIVED	1800	30	YES	yes		2
post	SURVIVED	1800	30	YES	yes		2	36.5
post	SURVIVED	1300	30	NO	no		2	37
post	SURVIVED	1650	30	YES	yes		2	36.5
post	SURVIVED	1600	30	YES	yes		2	36
post	SURVIVED	1300	30	YES	yes		2	36.9
post	SURVIVED	1600	30	YES	no		2	36.4
post	SURVIVED	1950	30	YES	yes		1	36.1
post	SURVIVED	1900	30	YES	yes	inborn	2	36.7
post	SURVIVED	1400	30	NO	no	inborn	2	36.8
post	SURVIVED	1800	30	NO	no	inborn	2	36.2
post	SURVIVED	1700	30	NO	no	inborn	2	36.2
post	SURVIVED	1600	30	YES	yes	inborn	2	36.5
post	SURVIVED	2350	30	NO	no	inborn	1	35.9
post	SURVIVED	1800	30	NO	no	inborn	2	36.2
post	SURVIVED	1600	30	NO	no	inborn	2	36.7
post	SURVIVED	1600	30	NO	no	inborn	2	35
post	SURVIVED	1950	30	NO	no		2	36
post	SURVIVED	1900	30	NO	no		2	36.5
post	SURVIVED	1900	30	NO	no		2	37.3
post	SURVIVED	1800	30	YES	yes		1	36.5
post	SURVIVED	1400	30	YES	no		2	36.5
post	SURVIVED	1800	30	NO	yes	inborn	2	35
post	SURVIVED		30	NO	yes		1	34
post	SURVIVED	1590	30	NO	yes	inborn	2	36
post	SURVIVED	2350	30	NO	yes	inborn	2	36
post	SURVIVED	1400	30	NO	no	inborn	2
post	SURVIVED	1845	30	NO	no		2
post	SURVIVED	1039	30	NO	no		2	35
post	SURVIVED	1038	30	NO	no		2	36
post	SURVIVED	1900	30	NO	no		2
post	SURVIVED	1370	30	NO	yes		1	36.4
post	SURVIVED	1700	30	YES	yes	inborn	1	36.8
post	SURVIVED	2000	30	YES	yes	referred	2	36.6
post	SURVIVED	900	30	YES	yes	inborn	1
post	SURVIVED	750	30	YES	yes	referred	1
post	SURVIVED	1400	30	YES	no	inborn	1
post	SURVIVED	1700	30	YES	yes	inborn	1	37.2
post	SURVIVED	1200	30	YES	yes	referred	1
post	SURVIVED	1920	30	YES	yes	inborn	1
post	SURVIVED	1900	30	YES	yes	inborn	1	36.6
post	SURVIVED	1250	30	YES	yes	inborn	1
post	SURVIVED	1650	30	YES	yes	inborn	1
post	SURVIVED	1300	30	YES	yes	inborn	1	36.8
post	SURVIVED	1200	30	YES	yes	inborn	1
post	SURVIVED	1800	30	YES	yes	inborn	1
post	SURVIVED	1400	30	YES	yes	inborn	1
post	SURVIVED	1500	30	NO	yes	referred	1	36.9
post	SURVIVED	1800	30	YES	yes	inborn	1	36.6
post	SURVIVED	2400	30	YES	yes	inborn	1
post	SURVIVED	2000	30	YES	yes	inborn	1	36.8
post	SURVIVED	1450	30	YES	yes	referred	1
post	SURVIVED	1300	30	NO	yes	referred	2	36.7
post	SURVIVED	1500	30	YES	yes	inborn	1
post	SURVIVED	1500	30	YES	yes	referred	2	36.9
post	SURVIVED	1800	30	YES	yes	inborn	1	36.6
post	SURVIVED	1250	30	YES	yes	inborn	1	36.5
post	SURVIVED	2200	30	YES	yes	referred	1	36.8
post	SURVIVED	1600	30	YES	yes	inborn	1
post	SURVIVED	1800	30	YES	yes	inborn	1
post	SURVIVED	2000	30	YES	yes	referred	1	37
post	SURVIVED	1200	30	YES	yes	inborn	1
post	SURVIVED	1800	30	YES	yes	referred	1	36.6
post	SURVIVED	1900	30	NO	yes	referred	1
post	SURVIVED	1100	30	YES	yes	referred	1	36.4
post	SURVIVED	1100	30	YES	yes	referred	1	36.6
post	SURVIVED	1400	30	YES	yes	inborn	1
post	SURVIVED	1700	30	YES	yes	referred	1	36.2
post	SURVIVED	1400	30	YES	yes	referred	1	36.6
post	SURVIVED	1800	30	YES	yes	inborn	1
post	SURVIVED	1700	30	YES	yes	inborn	1
post	SURVIVED	1500	30	YES	yes	inborn	1	37.3
post	SURVIVED	800	30	NO	yes	referred	1	36.9
post	SURVIVED	2000	30	YES	yes	inborn	1
post	SURVIVED	2100	30	YES	no	referred	2	37
post	SURVIVED	1400	30	YES	yes	inborn	1	36.6
post	SURVIVED	1650	30	YES	yes	inborn	1	37.3
post	SURVIVED	1600	30	YES	yes	referred	2	36.4
post	SURVIVED	1100	30	YES	yes	inborn	2	36.7
post	SURVIVED	1100	30	YES	yes	inborn	2	36.7
post	SURVIVED	1400	30	YES	yes	referred	1
post	SURVIVED	1400	30	YES	yes	referred	2	36.7
post	SURVIVED	1400	30	YES	yes	referred	1
post	SURVIVED	1300	30	YES	yes	referred	1
post	SURVIVED	2100	30	YES	yes	referred	1
post	SURVIVED	1450	30	YES	yes	inborn	1
post	SURVIVED	1000	30	YES	yes	inborn	2	36.9
post	SURVIVED	1700	30	YES	yes	inborn	1
post	SURVIVED	1400	30	YES	yes	inborn	1
post	SURVIVED	800	30	YES	yes	inborn	1	36.5
post	SURVIVED	1600	30	YES	yes	referred	2	37.3
post	SURVIVED	900	30	YES	yes	inborn	1
post	SURVIVED	1600	30	YES	yes	inborn	1
post	SURVIVED	1400	30	NO	yes	referred	1
post	SURVIVED	2400	30	YES	yes	referred	1
post	SURVIVED	1800	30	YES	yes	inborn	1
post	SURVIVED	2000	30	YES	yes	inborn	1
post	SURVIVED	1950	30	YES	yes	referred	1
post	SURVIVED	1500	30	NO	yes	referred	2	37.4
post	SURVIVED	1950	30	YES	yes	referred	2	36.6
post	SURVIVED	1200	30	NO	yes	referred	2
post	SURVIVED	1000	30	YES	yes	referred	2	36.4
post	SURVIVED	1100	30	YES	yes	referred	2	36.8
post	SURVIVED	1350	30	YES	yes	referred	2	37.1
post	SURVIVED	1500	30	YES	yes	referred	2	36.9
post	SURVIVED	1500	30	YES	yes	referred	2
post	SURVIVED	1050	30	YES	yes	referred	2	36.6
post	SURVIVED	1800	30	YES	yes	referred	1
post	SURVIVED	1500	30	YES	yes	inborn	2	36.4
post	SURVIVED	1200	30	YES	yes	inborn	1
post	SURVIVED	1800	30	YES	yes	referred	1
post	SURVIVED	2050	30	YES	yes	referred	1
post	SURVIVED	1400	30	YES	yes	inborn	1
post	SURVIVED	1350	30	NO	no	inborn	2
post	SURVIVED	1400	30	YES	yes	inborn	1	35.9
post	SURVIVED	1400	30	NO	no	referred	2
post	SURVIVED	2300	30	NO	no	referred	2
post	SURVIVED	1600	30	NO	no	referred	2
post	SURVIVED	1750	30	NO	no	referred	2
post	SURVIVED	1700	30	YES	yes	inborn	1	35.8
post	SURVIVED	2100	30	NO	yes	referred	1	35.9
post	SURVIVED	1400	30	YES	yes	inborn	1	36
post	SURVIVED	1400	30	YES	yes	referred	1	35.8
post	SURVIVED	1300	30	NO	no	referred	2
post	SURVIVED	1900	30	NO	yes	referred	1	36
post	SURVIVED	1800	30	YES	yes	inborn	1	35.5
post	SURVIVED	3050	30	NO	no	inborn	2	36
post	SURVIVED	1500	30	YES	yes	inborn	1	36
post	SURVIVED	1650	30	YES	yes	inborn	1	36.2
post	SURVIVED	1600	30	YES	yes	inborn	2	36.2
post	SURVIVED	1300	30	YES	no	inborn	1	36
post	SURVIVED	1100	30	NO	no	inborn	2	36.6
post	SURVIVED	1700	30	NO	no	inborn	2	37
post	SURVIVED	1750	30	YES	yes	inborn	2	36.6
post	SURVIVED	1600	30	YES	yes	inborn	2	36.4
post	SURVIVED	1800	30	YES	yes	inborn	2	37
post	SURVIVED	1200	30	YES	yes	inborn	1	37
post	SURVIVED	1400	30	YES	yes	inborn	2	37.1
post	SURVIVED	1900	30	NO	no	inborn	2	36.1
post	SURVIVED	1600	30	YES	yes	inborn	2	36.7
post	SURVIVED	1750	30	YES	yes	inborn	2	36.2
post	SURVIVED	1100	30	YES	yes	referred	2	36
post	SURVIVED	1600	30	YES	yes	inborn	2	36.1
post	SURVIVED	1850	30	YES	yes	inborn	2	36.3
post	SURVIVED	1900	30	YES	yes	inborn	2	36
post	SURVIVED	1800	30	YES	yes	inborn	1	36
post	SURVIVED	1800	30	NO	no	inborn	2	36.3
post	SURVIVED	1900	30	YES	yes	inborn	1	36.8
post	SURVIVED	1700	30	NO	no	inborn	2	36.5
post	SURVIVED	1650	30	NO	no	inborn	2	35.8
post	SURVIVED	3400	30	YES	yes	inborn	1	36
post	SURVIVED	3300	30	YES	yes	inborn	1	36.2
post	SURVIVED	1900	30	YES	yes	inborn	1	36
post	SURVIVED	1900	30	YES	yes	inborn	1	36
post	SURVIVED	1700	30	YES	yes	inborn	1	36
post	SURVIVED	1900	30	YES	yes	inborn	1	35.4
post	SURVIVED	1900	30	YES	yes	inborn	1	37
post	SURVIVED	1300	30	YES	yes	inborn	1	36
pre	SURVIVED	3150	31	NO	no	referred	2
pre	SURVIVED	3000	31	YES	yes	referred	1
pre	SURVIVED	3500	31	YES	yes	referred	1
pre	SURVIVED	1800	31	YES	yes	inborn	1
pre	SURVIVED	1500	31	YES	yes	referred	1	36.5
pre	SURVIVED	1700	31	YES	yes	inborn	1	36.5
pre	SURVIVED	1500	31	YES	yes	referred	1	35.9
pre	SURVIVED	1300	31	NO	no	inborn	2
pre	SURVIVED	1400	31	NO	no	inborn	2
pre	SURVIVED	1500	31	YES	yes	inborn	1	35
pre	SURVIVED	1800	31	NO	no	referred	2
pre	SURVIVED	1800	31	YES	yes	inborn	1	35.5
pre	SURVIVED	2300	31	NO	no	referred	2
pre	SURVIVED	1650	31	NO	no	referred	2
pre	SURVIVED	1400	31	NO	no	referred	2
pre	SURVIVED	1900	31	YES	no	referred	2
pre	SURVIVED	1650	31	NO	no	referred	2
pre	SURVIVED	1600	31	NO	no	referred	2
pre	SURVIVED	1400	31	NO	no	inborn	1
pre	SURVIVED	1900	31	YES	no	referred	1
pre	SURVIVED	1500	31	NO	no	referred	1
pre	SURVIVED	1700	31	NO	no	referred	2
pre	SURVIVED	1900	31	NO	no	referred	2
pre	SURVIVED	2700	31	YES	yes	referred	1	36
pre	SURVIVED	1700	31	YES	yes	referred	1	35.8
pre	SURVIVED	2300	31	NO	no	inborn	2
pre	SURVIVED	1900	31	YES	yes	inborn	1	36
pre	SURVIVED	1200	31	YES	yes	inborn	2	36.3
pre	SURVIVED	1500	31	YES	yes	inborn	1	36.2
pre	SURVIVED	1600	31	YES	yes	inborn	2	36.2
pre	SURVIVED	1700	31	NO	no	inborn	2	36.6
pre	SURVIVED	2080	31	NO	no	inborn	2
pre	SURVIVED	1630	31	NO	no	inborn	2
pre	SURVIVED	1370	31	YES	yes	inborn	1	35
pre	SURVIVED	1400	31	NO	no	inborn	2
pre	SURVIVED	2000	31	NO	no		2
pre	SURVIVED	2300	32	YES	yes	inborn	1	36.5
pre	SURVIVED	1600	32	YES	yes	referred	1
pre	SURVIVED	1700	32	YES	yes	inborn	1
pre	SURVIVED	2200	32	NO	no	referred	2
pre	SURVIVED	1700	32	NO	no	referred	2
pre	SURVIVED	2000	32	YES	yes	referred	1
pre	SURVIVED	1900	32	YES	yes	inborn	1
pre	SURVIVED	2200	32	YES	yes	inborn	1	36
pre	SURVIVED	2450	32	YES	yes	referred	1
pre	SURVIVED	1800	32	YES	yes	referred	1	36.9
pre	SURVIVED	1800	32	YES	yes	referred	1	35.5
pre	SURVIVED	2400	32	YES	yes	inborn	1	35.8
pre	SURVIVED	2000	32	NO	no	referred	2
pre	SURVIVED	1600	32	YES	yes	inborn	2
pre	SURVIVED	1800	32	NO	no	inborn	2
pre	SURVIVED	2400	32	YES	yes	referred	1	35.8
pre	SURVIVED	1150	32	NO	no	inborn	2
pre	SURVIVED	3000	32	NO	no	inborn	2
pre	SURVIVED	2900	32	NO	no	inborn	2
pre	SURVIVED	1800	32	NO	no	inborn	2
pre	SURVIVED	1500	32	YES	yes	inborn	2
pre	SURVIVED	1800	32	NO	no	inborn	2
pre	SURVIVED	1950	32	NO	no	inborn	2
pre	SURVIVED	1680	32	NO	no	inborn	2
pre	SURVIVED	1400	32	NO	no	inborn	2
pre	SURVIVED	1360	32	NO	no	inborn	2
pre	SURVIVED	1800	32	YES	yes	inborn	2
pre	SURVIVED	1650	32	NO	no	inborn	2
pre	SURVIVED	1350	32	YES	yes	inborn	2
pre	SURVIVED	1300	32	NO	no	inborn	2
pre	SURVIVED	1950	32	NO	no	inborn	2
pre	SURVIVED	1400	32	YES	no	inborn	2
pre	SURVIVED	1100	32	NO	no	inborn	2
pre	SURVIVED	1900	32	YES	no	referred	2
pre	SURVIVED	1200	32	NO	no	referred	2
pre	SURVIVED	1900	32	YES	no	referred	2
pre	SURVIVED	1800	32	NO	no	inborn	2
pre	SURVIVED	1650	32	NO	no	inborn	2
pre	SURVIVED	1750	32	NO	no	referred	2
pre	SURVIVED	1400	32	NO	no	referred	2
pre	SURVIVED	1600	32	NO	no	inborn	1
pre	SURVIVED	1400	32	NO	no	referred	2
pre	SURVIVED	1200	32	NO	no	inborn	2
pre	SURVIVED	1900	32	YES	no	referred	2
pre	SURVIVED	1500	32	NO	no	referred	2
pre	SURVIVED	1500	32	NO	no	inborn	1
pre	SURVIVED	1600	32	NO	no	referred	2
pre	SURVIVED	1700	32	NO	no	referred	1
pre	SURVIVED	1100	32	NO	no	inborn	1
pre	SURVIVED	2000	32	YES	no	referred	1
pre	SURVIVED	1500	32	NO	no	inborn	2
pre	SURVIVED	1800	32	NO	no	inborn	2
pre	SURVIVED	1930	32	YES	no	referred	2
pre	SURVIVED	1850	32	NO	no	referred	2
pre	SURVIVED	1900	32	YES	no	referred	2
pre	SURVIVED	1850	32	NO	no	inborn	2
pre	SURVIVED	2000	32	YES	yes	inborn	1	36.2
pre	SURVIVED	1900	32	YES	yes	referred	1	36
pre	SURVIVED	2000	32	YES	yes	referred	1
pre	SURVIVED	1900	32	NO	no	referred	2
pre	SURVIVED	2300	32	NO	no	referred	2
pre	SURVIVED	1800	32	NO	no	referred	2
pre	SURVIVED	1800	32	YES	yes	inborn	1	36.2
pre	SURVIVED	2300	32	NO	no	inborn	2
pre	SURVIVED	1700	32	YES	yes	referred	1	35.8
pre	SURVIVED	2500	32	YES	yes	inborn	1	36
pre	SURVIVED	2200	32	YES	yes	inborn	1	36
pre	SURVIVED	1900	32	YES	yes	inborn	1	36
pre	SURVIVED	1700	32	NO	no	inborn	2
pre	SURVIVED	1900	32	YES	yes	referred	2	36
pre	SURVIVED	2100	32	YES	yes	referred	2	36
pre	SURVIVED	1300	32	YES	yes	inborn	1	36.4
pre	SURVIVED	1800	32	YES	yes	inborn	1	36.7
pre	SURVIVED	1400	32	YES	yes	inborn	1	36
pre	SURVIVED	1800	32	NO	no	inborn	2	36.4
pre	SURVIVED	1400	32	YES	yes	inborn	1	36.7
pre	SURVIVED	1500	32	NO	no	inborn	2	36.2
pre	SURVIVED	1700	32	NO	no	inborn	2	36.2
pre	SURVIVED	1950	32	YES	no	inborn	1	36.4
pre	SURVIVED	1700	32	YES	yes	inborn	2	36.2
pre	SURVIVED	1150	32	NO	no	referred	2	36.3
pre	SURVIVED	2150	32	NO	yes	inborn	2	34
pre	SURVIVED	1710	32	YES	yes	inborn	1	36.1
pre	SURVIVED	1320	32	NO	no	inborn	2
pre	SURVIVED	1320	32	NO	no	inborn	2
pre	SURVIVED	1230	32	NO	no	inborn	2
pre	SURVIVED	1320	32	NO	no		2
pre	SURVIVED	1940	32	NO	no		2
pre	SURVIVED	2070	32	NO	no	inborn	2
pre	SURVIVED	1900	32	NO	no	inborn	2
pre	SURVIVED	1930	32	NO	no	inborn	2
pre	SURVIVED	1660	32	NO	no		2
pre	SURVIVED	1720	32	NO	no		2
post	SURVIVED	1300	31	YES	yes		1	37.1
post	SURVIVED	1150	31	YES	yes	inborn	1	37.2
post	SURVIVED	1300	31	YES	yes	referred	1	36.5
post	SURVIVED	1300	31	NO	yes	referred	1	36.2
post	SURVIVED	1200	31	NO	yes		1	36.9
post	SURVIVED	1000	31	YES	yes	referred	1	37.3
post	SURVIVED	1000	31	NO	yes	referred	1	36.2
post	SURVIVED	1200	31	YES	yes		1	36.2
post	SURVIVED	1200	31	YES	yes		1	37.2
post	SURVIVED	1150	31	YES	yes	referred	1	36.2
post	SURVIVED	1150	31	NO	yes		1	35.8
post	SURVIVED	1700	31	NO	no	inborn	1	36
post	SURVIVED	1450	31	YES	yes	inborn	1	35.9
post	SURVIVED	1500	31	YES	yes	inborn	1	35.9
post	SURVIVED	1500	31	YES	yes	referred	1	36
post	SURVIVED	1500	31	YES	yes	inborn	1	36
post	SURVIVED	1200	31	NO	yes	referred	1	35.8
post	SURVIVED	2100	31	YES	yes	referred	1	36
post	SURVIVED	1650	31	YES	yes	referred	1	35.9
post	SURVIVED	1200	31	YES	yes	inborn	1	36
post	SURVIVED	1150	31	NO	yes	referred	1	35.6
post	SURVIVED	2050	31	YES	yes	inborn	1	36.6
post	SURVIVED	1100	31	NO	yes	referred	1	35.7
post	SURVIVED	1400	31	NO	yes	referred	1	35.9
post	SURVIVED	1530	31	YES	yes	referred	1	35.9
post	SURVIVED	1600	31	YES	yes	referred	2	36.7
post	SURVIVED	1670	31	YES	yes	referred	1	37.1
post	SURVIVED	2300	31	YES	yes		1	37
post	SURVIVED	2000	31	YES	yes	referred	1	36.8
post	SURVIVED	1900	31	YES	yes	referred	1	36.7
post	SURVIVED	2000	31	YES	yes	referred	1	36.9
post	SURVIVED	1500	31	YES	yes	inborn	1	36.9
post	SURVIVED	2300	31	YES	yes	inborn	1	37
post	SURVIVED	2000	31	YES	yes	inborn	1	37.3
post	SURVIVED	1600	31	YES	yes	referred	1	36.5
post	SURVIVED	1400	31	YES	yes	inborn	1	36.6
post	SURVIVED	1300	31	NO	yes		2	36.1
post	SURVIVED	1500	31	YES	yes	referred	1	36.3
post	SURVIVED	1500	31	YES	yes	referred	1	36.5
post	SURVIVED	1380	31	YES	yes	referred	2	36.3
post	SURVIVED	1400	31	YES	yes	inborn	1	37.1
post	SURVIVED	2000	31	YES	yes	referred	1	36.8
post	SURVIVED	2420	31	YES	yes	referred	1	36.7
post	SURVIVED	1450	31	YES	yes	referred	1	36.4
post	SURVIVED	1470	31	YES	yes	referred	1	36.8
post	SURVIVED	1410	31	YES	yes	referred	1	36.2
post	SURVIVED	1500	31	YES	yes	inborn	1	36.9
post	SURVIVED	1800	31	NO	yes	referred	2	36.4
post	SURVIVED	1690	31	NO	yes	referred	1	36.1
post	SURVIVED	1600	31	YES	yes	inborn	1	35.9
post	SURVIVED	1600	31	YES	yes	referred	1	36.2
post	SURVIVED	2000	31	YES	yes	referred	1	36.2
post	SURVIVED	2100	31	NO	yes	referred	1	36
post	SURVIVED	1800	31	YES	yes	inborn	1	36.5
post	SURVIVED	1850	31	YES	yes	inborn	1	36.5
post	SURVIVED	1750	31	YES	yes	referred	1	36.4
post	SURVIVED	1450	31	YES	yes	referred	2	36
post	SURVIVED	1250	31	YES	yes	inborn	1	36.3
post	SURVIVED	1000	31	YES	yes	referred	1	37.4
post	SURVIVED	1100	31	YES	yes	referred	1	36.6
post	SURVIVED	1400	31	YES	yes	inborn	1	37.1
post	SURVIVED	2260	31	YES	yes	inborn	1	37.1
post	SURVIVED	1300	31	NO	no	referred	1
post	SURVIVED	1800	31	NO	no	referred	2	36
post	SURVIVED	1300	31	YES	yes	referred	1	36.6
post	SURVIVED	2050	31	NO	no	referred	1
post	SURVIVED	1000	31	YES	yes	inborn	1	37.1
post	SURVIVED	1900	31	YES	yes	inborn	1	36.8
post	SURVIVED	1100	31	NO	no	referred	1	36
post	SURVIVED	1600	31	NO	no	referred	1	36.1
post	SURVIVED	2100	31	NO	no	referred	2	36
post	SURVIVED	1900	31	NO	no	referred	2	35.9
post	SURVIVED	2200	31	YES	yes	inborn	1	36.9
post	SURVIVED	1400	31	YES	yes	inborn	1	36.9
post	SURVIVED	2200	31	YES	yes	inborn	1	36.9
post	SURVIVED	1750	31	NO	no	referred	1	36
post	SURVIVED	1100	31	YES	yes	inborn	1	36.8
post	SURVIVED	1600	31	NO	no	referred	2	36.4
post	SURVIVED	1600	31	YES	yes	inborn	1	37.1
post	SURVIVED	2150	31	NO	no	referred	2	36.4
post	SURVIVED	2100	31	NO	no	referred	2	36.4
post	SURVIVED	1500	31	NO	no	referred	1	36
post	SURVIVED	2200	31	YES	yes	inborn	1	36.9
post	SURVIVED	1800	31	YES	yes	referred	1	36.7
post	SURVIVED	2100	31	YES	yes	referred	1	36.6
post	SURVIVED	1550	31	YES	yes	referred	1	36.8
post	SURVIVED	2200	31	YES	yes	inborn	1	36.9
post	SURVIVED	2250	31	YES	yes	inborn	1	36.8
post	SURVIVED	1270	31	YES	yes	inborn	1	36.9
post	SURVIVED	2000	31	YES	yes	inborn	1	36.9
post	SURVIVED	1900	31	NO	no	referred	1	35.9
post	SURVIVED	1300	31	YES	yes	inborn	1	36.9
post	SURVIVED	1200	31	YES	yes	referred	1	36.7
post	SURVIVED	1800	31	YES	yes	inborn	1	36.9
post	SURVIVED	1800	31	NO	no	referred	2	36.3
post	SURVIVED	1300	31	YES	yes	inborn	1	37.1
post	SURVIVED	1600	31	NO	no	referred	2
post	SURVIVED	1900	31	NO	no	referred	1
post	SURVIVED	1600	31	YES	yes	inborn	1	37.1
post	SURVIVED	2200	31	NO	no	referred	2
post	SURVIVED	2100	31	YES	yes	inborn	1	36
post	SURVIVED	1700	31	YES	yes	inborn	1	36
post	SURVIVED	1600	31	YES	yes	referred	1	35.6
post	SURVIVED	2250	31	YES	yes	referred	1	36
post	SURVIVED	1300	31	YES	yes	referred	1	36
post	SURVIVED	1600	31	YES	yes	referred	1	35.5
post	SURVIVED	1650	31	NO	yes	referred	1	35.9
post	SURVIVED	2250	31	YES	yes	referred	1	36
post	SURVIVED	1700	31	YES	yes	referred	1	36.2
post	SURVIVED	1950	31	YES	yes	inborn	1	36
post	SURVIVED	1300	31	YES	yes	referred	1	36
post	SURVIVED	1600	31	YES	yes	referred	1	35.8
post	SURVIVED	2300	31	YES	yes	inborn	1	36
post	SURVIVED	1900	31	YES	yes	referred	1	36.8
post	SURVIVED	1900	31	YES	yes	inborn	1	35.2
post	SURVIVED	1800	31	YES	yes	inborn	2	36.2
post	SURVIVED	1900	31	YES	yes	inborn	1	36
post	SURVIVED	1800	31	YES	yes		2	36.5
post	SURVIVED	1700	31	YES	yes		2	36.1
post	SURVIVED	1600	31	YES	yes		2	36.4
post	SURVIVED	1400	31	NO	no		2	36.7
post	SURVIVED	1600	31	YES	yes		2	36.3
post	SURVIVED	1900	31	YES	yes		1	36.8
post	SURVIVED	2150	31	YES	no	inborn	1	35.2
post	SURVIVED	1800	31	NO	no		2	37.4
post	SURVIVED	1900	31	YES	yes		1	36.4
post	SURVIVED	1510	31	NO	no	referred	2
post	SURVIVED	2045	31	NO	no	referred	2
post	SURVIVED	1080	31	YES	yes		1	34.9
post	SURVIVED	1200	31	YES	yes	inborn	1
post	SURVIVED	1500	31	YES	yes	referred	1
post	SURVIVED	2130	31	YES	yes	referred	2	37
post	SURVIVED	1550	31	YES	yes	referred	2
post	SURVIVED	1500	31	YES	yes	inborn	1
post	SURVIVED	2200	31	YES	yes	referred	1	36.8
post	SURVIVED	1400	31	YES	yes	inborn	1
post	SURVIVED	1100	31	NO	yes	referred	2	36.5
post	SURVIVED	1300	31	YES	yes	inborn	1
post	SURVIVED	1400	31	NO	yes	inborn	1
post	SURVIVED	1030	31	YES	yes	inborn	1
post	SURVIVED	1550	31	NO	yes	referred	2	36.1
post	SURVIVED	1650	31	NO	yes	referred	2	36.3
post	SURVIVED	1700	31	NO	yes	referred	1	36.8
post	SURVIVED	1600	31	YES	yes	referred	1
post	SURVIVED	1400	31	NO	yes	inborn	1
post	SURVIVED	1700	31	NO	yes	referred	1
post	SURVIVED	1400	31	YES	yes	referred	1
post	SURVIVED	1300	31	YES	yes	inborn	1	36.6
post	SURVIVED	1350	31	YES	yes	inborn	1	36.9
post	SURVIVED	2100	31	YES	yes	referred	1	37.1
post	SURVIVED	1400	31	YES	yes	inborn	2	37
post	SURVIVED	1400	31	YES	yes	referred	1
post	SURVIVED	1800	31	YES	yes	inborn	1
post	SURVIVED	1900	31	YES	yes	referred	1
post	SURVIVED	1800	31	YES	yes	inborn	1
post	SURVIVED	2000	31	YES	yes	inborn	1
post	SURVIVED	1600	31	YES	yes	inborn	1
post	SURVIVED	1500	31	YES	yes	inborn	1	35.9
post	SURVIVED	1300	31	YES	yes	referred	1	36.9
post	SURVIVED	2450	31	YES	yes	inborn	1	37.3
post	SURVIVED	1600	31	YES	yes	referred	1
post	SURVIVED	2000	31	YES	yes	referred	1
post	SURVIVED	1800	31	YES	yes	inborn	1
post	SURVIVED	2400	31	YES	yes	inborn	1
post	SURVIVED	1600	31	YES	yes	referred	1	36.7
post	SURVIVED	1800	31	YES	yes	referred	1
post	SURVIVED	1600	31	YES	yes	referred	1
post	SURVIVED	1900	31	YES	yes	inborn	1
post	SURVIVED	2000	31	YES	yes	inborn	1
post	SURVIVED	2100	31	YES	yes	referred	1
post	SURVIVED	1200	31	YES	yes	referred	1	37.2
post	SURVIVED	1300	31	YES	yes	referred	1	36.4
post	SURVIVED	2000	31	YES	yes	inborn	1	36.9
post	SURVIVED	1600	31	YES	yes	referred	1	36.7
post	SURVIVED	1800	31	YES	yes	inborn	1
post	SURVIVED	2200	31	YES	yes	inborn	1
post	SURVIVED	1600	31	YES	yes	inborn	1	37.5
post	SURVIVED	2000	31	YES	yes	inborn	1	36.4
post	SURVIVED	1900	31	YES	yes	referred	2	37.2
post	SURVIVED	1540	31	YES	yes	referred	2	36.7
post	SURVIVED	2100	31	YES	yes	inborn	2
post	SURVIVED	2100	31	YES	yes	referred	2	36.9
post	SURVIVED	1950	31	YES	yes	referred	1	37.3
post	SURVIVED	1950	31	YES	yes	referred	1
post	SURVIVED	800	31	YES	yes	referred	1
post	SURVIVED	1000	31	NO	yes	referred	2	36.7
post	SURVIVED	1600	31	NO	yes	referred	2	36.5
post	SURVIVED	1400	31	YES	yes	referred	1
post	SURVIVED	2000	31	YES	yes	referred	1
post	SURVIVED	2300	31	NO	yes	referred	2	36.6
post	SURVIVED	2200	31	NO	yes	referred	2	36.9
post	SURVIVED	2400	31	YES	yes	inborn	1	37.4
post	SURVIVED	1700	31	YES	yes	referred	2
post	SURVIVED	1050	31	YES	yes	inborn	1
post	SURVIVED	1200	31	YES	yes	inborn	1
post	SURVIVED	1700	31	YES	yes	inborn	1
post	SURVIVED	2300	31	YES	yes	referred	2	37.3
post	SURVIVED	1200	31	YES	yes	referred	1
post	SURVIVED	1800	31	YES	yes	inborn	2
post	SURVIVED	2100	31	YES	yes	referred	2	36.5
post	SURVIVED	1140	31	YES	yes	referred	1
post	SURVIVED	1180	31	YES	yes	referred	1
post	SURVIVED	1800	31	YES	yes	referred	1
post	SURVIVED	1800	31	YES	yes	inborn	1
post	SURVIVED	2300	31	NO	yes	referred	1	35.8
post	SURVIVED	1250	31	YES	yes	inborn	1	35.7
post	SURVIVED	1850	31	YES	yes	referred	1	36
post	SURVIVED	1750	31	YES	yes	inborn	1	36
post	SURVIVED	1700	31	NO	no	referred	2
post	SURVIVED	1750	31	NO	no	referred	2
post	SURVIVED	1400	31	YES	yes	inborn	1	36
post	SURVIVED	1450	31	NO	no	inborn	2
post	SURVIVED	1700	31	NO	yes	referred	1	36
post	SURVIVED	1500	31	YES	yes	inborn	1	36
post	SURVIVED	1800	31	NO	no	inborn	2	37
post	SURVIVED	1950	31	YES	yes	inborn	2	35.5
post	SURVIVED	1700	31	YES	yes	inborn	2	36
post	SURVIVED	1850	31	YES	yes	inborn	1	36
post	SURVIVED	1100	32	NO	yes	inborn	1	37.2
post	SURVIVED	1300	32	YES	yes	referred	1	36.9
post	SURVIVED	1100	32	YES	yes	referred	1	36.2
post	SURVIVED	1600	32	YES	yes		1	36.1
post	SURVIVED	1900	32	YES	yes	inborn	1	37.1
post	SURVIVED	2200	32	YES	yes	referred	1	36.8
post	SURVIVED	1100	32	YES	yes	inborn	1	36
post	SURVIVED	1200	32	YES	yes		1	37.1
post	SURVIVED	1850	32	YES	yes	referred	1	36.1
post	SURVIVED	1300	32	YES	yes	inborn	1	37.2
post	SURVIVED	1100	32	YES	yes		1	36
post	SURVIVED	1300	32	YES	yes	referred	1	36.5
post	SURVIVED	1000	32	YES	yes	referred	1	36.2
post	SURVIVED	1600	32	NO	yes	referred	1	36.8
post	SURVIVED	1000	32	YES	yes	inborn	1	37.3
post	SURVIVED	1300	32	YES	yes	inborn	1	36.4
post	SURVIVED	1850	32	YES	yes		1	36.2
post	SURVIVED	1700	32	YES	yes	inborn	1	37.1
post	SURVIVED	1100	32	YES	yes	referred	1	36.6
post	SURVIVED	2200	32	YES	yes	inborn	1	36.4
post	SURVIVED	1400	32	NO	no	referred	1	35.5
post	SURVIVED	1750	32	YES	yes	inborn	1	36
post	SURVIVED	1600	32	YES	yes	inborn	1	35.9
post	SURVIVED	1900	32	NO	no	referred	2
post	SURVIVED	1700	32	YES	yes	inborn	1	36
post	SURVIVED	1600	32	YES	yes	referred	1	35.5
post	SURVIVED	1500	32	YES	yes	inborn	1	35.3
post	SURVIVED	1800	32	NO	yes	referred	1	36
post	SURVIVED	1400	32	YES	yes	referred	1	35.9
post	SURVIVED	2400	32	NO	no	referred	2
post	SURVIVED	2400	32	YES	yes	inborn	1	35.4
post	SURVIVED	1200	32	NO	no	referred	2
post	SURVIVED	1200	32	YES	yes	referred	1	35
post	SURVIVED	1900	32	YES	yes	referred	1	35.9
post	SURVIVED	2300	32	YES	yes	referred	1	36
post	SURVIVED	2200	32	NO	no	inborn	2
post	SURVIVED	1700	32	NO	yes	inborn	1	35.9
post	SURVIVED	2130	32	YES	yes	referred	1	36.9
post	SURVIVED	1650	32	YES	yes	referred	2	36.2
post	SURVIVED	1920	32	YES	yes	inborn	2	37
post	SURVIVED	1600	32	YES	yes		1	37.2
post	SURVIVED	1900	32	YES	yes	referred	1	37
post	SURVIVED	1800	32	YES	yes	referred	1	37.6
post	SURVIVED	1500	32	NO	yes	referred	2	36.2
post	SURVIVED	1500	32	YES	yes	inborn	1	37
post	SURVIVED	1650	32	YES	yes	referred	1	37.3
post	SURVIVED	1900	32	NO	yes	referred	2	36.4
post	SURVIVED	1800	32	YES	yes	referred	1	36.5
post	SURVIVED	1300	32	YES	yes	inborn	1	36.6
post	SURVIVED	1600	32	YES	yes	inborn	1	37.3
post	SURVIVED	1600	32	YES	yes	inborn	1	37.5
post	SURVIVED	2100	32	NO	yes	referred	1	36.4
post	SURVIVED	2100	32	NO	yes	referred	1	36.7
post	SURVIVED	1600	32	YES	yes	referred	1	37
post	SURVIVED	2000	32	YES	yes	inborn	1	36.4
post	SURVIVED	2300	32	YES	yes	referred	1	37.3
post	SURVIVED	1700	32	YES	yes	inborn	2	36.5
post	SURVIVED	1450	32	YES	yes	inborn	1	36.6
post	SURVIVED	1700	32	YES	yes	inborn	1	36.5
post	SURVIVED	1100	32	NO	yes	referred	1	36
post	SURVIVED	2110	32	NO	yes	referred	2	36.2
post	SURVIVED	2200	32	YES	yes	referred	1	36.4
post	SURVIVED	2000	32	NO	yes	referred	2	36.5
post	SURVIVED	2670	32	NO	yes	referred	2	37.3
post	SURVIVED	1900	32	NO	yes	inborn	2	36.7
post	SURVIVED	2200	32	YES	yes	referred	1	37.2
post	SURVIVED	2300	32	YES	yes	referred	1	37.2
post	SURVIVED	1500	32	NO	yes	referred	1	36.1
post	SURVIVED	2000	32	YES	yes	inborn	1	37.7
post	SURVIVED	2200	32	YES	yes	referred	1	37.3
post	SURVIVED	1700	32	NO	yes	referred	2	36
post	SURVIVED	1375	32	YES	yes	inborn	1	36.7
post	SURVIVED	1600	32	YES	yes	referred	1	37.2
post	SURVIVED	2000	32	YES	yes	referred	2	37.1
post	SURVIVED	2200	32	YES	yes	referred	1	37.2
post	SURVIVED	2200	32	NO	yes	referred	1	35.9
post	SURVIVED	2100	32	NO	yes	referred	1	36
post	SURVIVED	1750	32	YES	yes	referred	2	37
post	SURVIVED	1600	32	YES	yes	referred	1	36.9
post	SURVIVED	1900	32	NO	yes	inborn	2	36
post	SURVIVED	1300	32	YES	yes	referred	1	36.5
post	SURVIVED	1400	32	NO	yes	referred	1	35.8
post	SURVIVED	2000	32	YES	yes	inborn	1	36.8
post	SURVIVED	1700	32	YES	yes	inborn	1	36.7
post	SURVIVED	1800	32	YES	yes	referred	1	35.7
post	SURVIVED	1750	32	YES	yes	inborn	1	36.5
post	SURVIVED	1750	32	YES	yes	inborn	1	36.6
post	SURVIVED	1800	32	YES	yes	referred	2	36.2
post	SURVIVED	1700	32	YES	yes	referred	1	36.1
post	SURVIVED	2000	32	YES	yes	inborn	2	36.2
post	SURVIVED	1200	32	YES	yes	referred	1	36.2
post	SURVIVED	2050	32	YES	yes	referred	1	36.6
post	SURVIVED	1800	32	YES	yes	referred	1	37
post	SURVIVED	1900	32	YES	yes	referred	1	36.6
post	SURVIVED	1900	32	YES	yes	referred	1	36.5
post	SURVIVED	2200	32	YES	yes	referred	1	36.8
post	SURVIVED	1500	32	YES	yes	referred	1	36.1
post	SURVIVED	1900	32	NO	yes	referred	2	39.9
post	SURVIVED	2100	32	NO	yes	referred	2	36.1
post	SURVIVED	1900	32	YES	yes	referred	1	36.9
post	SURVIVED	1700	32	YES	yes	referred	1	36.8
post	SURVIVED	1500	32	NO	yes	referred	1	36.9
post	SURVIVED	1890	32	NO	yes	inborn	2	36.3
post	SURVIVED	1600	32	YES	yes	referred	1	36.7
post	SURVIVED	1850	32	NO	yes	referred	1	35.7
post	SURVIVED	1900	32	YES	yes	inborn	1	36.9
post	SURVIVED	2500	32	NO	yes	referred	2	36
post	SURVIVED	1900	32	YES	yes	referred	1	36.2
post	SURVIVED	1800	32	YES	yes	inborn	1	36.8
post	SURVIVED	1350	32	YES	yes	inborn	1	36.5
post	SURVIVED	2100	32	YES	yes	inborn	1	36.4
post	SURVIVED	1660	32	YES	yes	referred	1	36.8
post	SURVIVED	2400	32	NO	yes	inborn	1	36.4
post	SURVIVED	2400	32	YES	yes	referred	1	36.6
post	SURVIVED	1900	32	NO	yes	referred	2	36.2
post	SURVIVED	1700	32	YES	yes	inborn	1	36.3
post	SURVIVED	1500	32	YES	yes	inborn	1	36.2
post	SURVIVED	1500	32	NO	yes	inborn	1	36.3
post	SURVIVED	1900	32	YES	yes	inborn	1	36.9
post	SURVIVED	1200	32	YES	yes	referred	1	36
post	SURVIVED	2300	32	YES	yes	referred	1	36.2
post	SURVIVED	1850	32	YES	yes	inborn	1	36
post	SURVIVED	1800	32	YES	yes	referred	1	37
post	SURVIVED	1700	32	YES	yes	referred	1	36.3
post	SURVIVED	1750	32	YES	yes	referred	1	36.6
post	SURVIVED	1520	32	YES	yes	referred	1	36.8
post	SURVIVED	2000	32	YES	yes	referred	1	36.2
post	SURVIVED	1900	32	YES	yes	referred	1	36.8
post	SURVIVED	1450	32	YES	yes	referred	1	36.5
post	SURVIVED	1900	32	YES	yes	referred	1	36
post	SURVIVED	2200	32	YES	yes	referred	1	36.7
post	SURVIVED	1500	32	YES	yes	inborn	1	36.4
post	SURVIVED	2150	32	NO	yes	inborn	2	36.8
post	SURVIVED	1400	32	YES	yes	referred	1	36.6
post	SURVIVED	1450	32	YES	yes	inborn	1	36.1
post	SURVIVED	1300	32	NO	yes	referred	2	36.1
post	SURVIVED	1600	32	YES	yes	inborn	1	37.1
post	SURVIVED	2200	32	YES	yes	referred	1	37.2
post	SURVIVED	1500	32	NO	yes	inborn	1	36.3
post	SURVIVED	1950	32	NO	yes	inborn	2	36.5
post	SURVIVED	2100	32	NO	yes	referred	1	36.8
post	SURVIVED	1400	32	YES	yes	referred	1	36.5
post	SURVIVED	2000	32	YES	yes	inborn	1	36.8
post	SURVIVED	2300	32	NO	no	inborn	2	36.3
post	SURVIVED	1400	32	NO	no	referred	1	36.4
post	SURVIVED	1520	32	YES	yes	referred	1	36.8
post	SURVIVED	2100	32	NO	no	referred	1	36.1
post	SURVIVED	1900	32	NO	no	referred	1	36.1
post	SURVIVED	2000	32	NO	no	referred	2	35.9
post	SURVIVED	2100	32	YES	yes	referred	1	36.5
post	SURVIVED	1290	32	YES	yes	referred	1	36.7
post	SURVIVED	1750	32	YES	yes	inborn	1	37.1
post	SURVIVED	1800	32	YES	yes	inborn	1	37.1
post	SURVIVED	1900	32	NO	no	referred	1	36.2
post	SURVIVED	2000	32	YES	yes	referred	1	36.6
post	SURVIVED	1800	32	NO	no	referred	2	36.3
post	SURVIVED	1900	32	YES	yes	inborn	1	37
post	SURVIVED	2200	32	YES	yes	inborn	1	36.8
post	SURVIVED	1700	32	NO	no	referred	1	36.1
post	SURVIVED	2300	32	NO	no	referred	2
post	SURVIVED	2210	32	YES	yes	inborn	1	36.8
post	SURVIVED	2000	32	NO	no	referred	2	35.9
post	SURVIVED	2000	32	NO	no	referred	2	35.9
post	SURVIVED	1900	32	NO	no	referred	2	35.9
post	SURVIVED	2100	32	YES	yes	referred	1	36.5
post	SURVIVED	1800	32	YES	yes	inborn	1	37.1
post	SURVIVED	2000	32	YES	yes	referred	1	36.6
post	SURVIVED	1500	32	NO	no	referred	2	36.2
post	SURVIVED	2300	32	YES	yes	referred	1	36.6
post	SURVIVED	1700	32	NO	no	referred	2	36.4
post	SURVIVED	1200	32	NO	no	referred	2
post	SURVIVED	1900	32	NO	no	referred	1	36.2
post	SURVIVED	1700	32	NO	no	referred	2	35.9
post	SURVIVED	2250	32	NO	no	referred	2
post	SURVIVED	1600	32	NO	no	referred	1	36
post	SURVIVED	1800	32	NO	no	referred	1	36
post	SURVIVED	2000	32	YES	yes	inborn	1	36.8
post	SURVIVED	2400	32	YES	yes	referred	1	36.7
post	SURVIVED	1800	32	YES	yes	referred	1	36.7
post	SURVIVED	1500	32	YES	yes	referred	1	36.6
post	SURVIVED	2000	32	YES	yes	inborn	1	36.8
post	SURVIVED	2050	32	YES	yes	referred	1	36.8
post	SURVIVED	1850	32	NO	no	referred	1	36.3
post	SURVIVED	1800	32	NO	no	referred	2
post	SURVIVED	1800	32	YES	yes	inborn	1	36.9
post	SURVIVED	1650	32	YES	yes	inborn	1	36.8
post	SURVIVED	2000	32	YES	yes	referred	1	36.6
post	SURVIVED	1600	32	YES	yes	inborn	1	37
post	SURVIVED	2000	32	NO	no	referred	1	36.2
post	SURVIVED	2100	32	NO	no	referred	1	36.2
post	SURVIVED	1800	32	YES	yes	inborn	1	37.5
post	SURVIVED	1900	32	YES	yes	referred	1	37.3
post	SURVIVED	2000	32	NO	no	referred	2	36.4
post	SURVIVED	1300	32	NO	no	referred	2	36.1
post	SURVIVED	2200	32	YES	yes	referred	1	36.6
post	SURVIVED	1800	32	YES	yes	inborn	1	37
post	SURVIVED	1500	32	YES	yes	inborn	1	37.1
post	SURVIVED	1650	32	YES	yes	inborn	1	36.8
post	SURVIVED	2000	32	YES	yes	inborn	1	37
post	SURVIVED	2000	32	YES	yes	referred	1	36.6
post	SURVIVED	1700	32	NO	no	referred	1	36
post	SURVIVED	1500	32	YES	yes	referred	1	36.6
post	SURVIVED	1500	32	YES	yes	inborn	1	37
post	SURVIVED	1750	32	YES	yes	inborn	1	37
post	SURVIVED	1000	32	YES	yes	inborn	1	37.1
post	SURVIVED	1600	32	YES	yes	inborn	1	37
post	SURVIVED	1900	32	YES	yes	inborn	1	37.1
post	SURVIVED	1150	32	YES	yes	inborn	1	37
post	SURVIVED	1540	32	YES	yes	inborn	1	37
post	SURVIVED	2100	32	YES	yes	inborn	1	36.8
post	SURVIVED	1700	32	YES	yes	inborn	2	37.1
post	SURVIVED	1800	32	YES	yes	referred	1	36.8
post	SURVIVED	1900	32	YES	yes	referred	1	36.5
post	SURVIVED	2400	32	NO	no	referred	1	36.2
post	SURVIVED	2100	32	YES	yes	inborn	1	36.8
post	SURVIVED	2300	32	YES	yes	referred	1	36.5
post	SURVIVED	1500	32	YES	yes	referred	1	36.6
post	SURVIVED	1400	32	NO	no	referred	1	36.4
post	SURVIVED	1700	32	YES	yes	referred	1	36.5
post	SURVIVED	1700	32	YES	yes	inborn	1	37.1
post	SURVIVED	1700	32	YES	yes	inborn	1	37.1
post	SURVIVED	1800	32	YES	yes	referred	1	36.8
post	SURVIVED	1900	32	NO	no	referred	1	36.4
post	SURVIVED	2100	32	NO	no	referred	1	36.4
post	SURVIVED	1500	32	YES	yes	inborn	1	37.1
post	SURVIVED	2200	32	YES	yes	inborn	1	37.1
post	SURVIVED	1300	32	YES	yes	inborn	1	37
post	SURVIVED	1800	32	YES	yes	referred	1	36.5
post	SURVIVED	2100	32	YES	yes	referred	1	36.6
post	SURVIVED	1700	32	YES	yes	inborn	1	37
post	SURVIVED	1700	32	NO	no	referred	2	35.9
post	SURVIVED	1700	32	YES	yes	referred	1	36.6
post	SURVIVED	2000	32	NO	no	referred	1	36.4
post	SURVIVED	1200	32	YES	yes	referred	1	37.3
post	SURVIVED	2000	32	YES	yes	inborn	1	37.1
post	SURVIVED	2000	32	YES	yes	inborn	1	37.1
post	SURVIVED	1900	32	YES	yes	inborn	1	37
post	SURVIVED	2000	32	YES	yes	inborn	1	37.1
post	SURVIVED	1800	32	YES	yes	inborn	1	37.1
post	SURVIVED	1800	32	YES	yes	inborn	1	36
post	SURVIVED	1600	32	NO	yes	referred	1	35.8
post	SURVIVED	1650	32	NO	yes	inborn	1	35.9
post	SURVIVED	3200	32	NO	no	referred	2
post	SURVIVED	2300	32	NO	yes	referred	1	36
post	SURVIVED	1600	32	NO	yes	inborn	1	35.8
post	SURVIVED	2100	32	YES	yes	inborn	1	35.7
post	SURVIVED	1600	32	YES	yes	referred	1	35.9
post	SURVIVED	1600	32	YES	yes	referred	1	35.8
post	SURVIVED	2550	32	NO	yes	referred	1	35.5
post	SURVIVED	1600	32	YES	yes	referred	1	36
post	SURVIVED	1150	32	YES	yes	referred	1	35.8
post	SURVIVED	1700	32	NO	yes	referred	1	35.9
post	SURVIVED	1800	32	YES	yes	referred	1	36
post	SURVIVED	2100	32	NO	no	referred	2
post	SURVIVED	1400	32	NO	yes	referred	1	35.6
post	SURVIVED	2100	32	NO	yes	referred	1	36
post	SURVIVED	2100	32	NO	yes	referred	1	36
post	SURVIVED	2200	32	YES	yes	inborn	1	36
post	SURVIVED	2250	32	NO	no	inborn	2
post	SURVIVED	1600	32	YES	yes	referred	1	36
post	SURVIVED	1950	32	YES	yes	inborn	1	36
post	SURVIVED	950	32	YES	yes	inborn	1	36
post	SURVIVED	1950	32	YES	yes	inborn	1	36
post	SURVIVED	1900	32	YES	yes	inborn	1	36.1
post	SURVIVED	1300	32	NO	no	inborn	2	36
post	SURVIVED	1800	32	YES	yes	inborn	2	37
post	SURVIVED	1500	32	YES	yes	referred	2	36.2
post	SURVIVED	1750	32	YES	no	referred	2	37
post	SURVIVED	1850	32	YES	yes	inborn	2	36.3
post	SURVIVED	1800	32	YES	yes	inborn	2	36
post	SURVIVED	1100	32	YES	yes	referred	2	36.1
post	SURVIVED	1800	32	YES	yes	referred	2	36.6
post	SURVIVED	1800	32	YES	yes		1	36.5
post	SURVIVED	1800	32	YES	yes		2	36.7
post	SURVIVED	1500	32	YES	yes		2	36.2
post	SURVIVED	1900	32	YES	no		2	36.7
post	SURVIVED	1700	32	YES	yes		2	36.7
post	SURVIVED	1950	32	YES	yes		1	36.2
post	SURVIVED	1200	32	NO	no	inborn	2	36.4
post	SURVIVED	1450	32	NO	yes	referred	2	36.7
post	SURVIVED	1700	32	YES	yes	referred	2	37
post	SURVIVED	1950	32	NO	no		2	36.2
post	SURVIVED	1800	32	NO	no		2	37.5
post	SURVIVED		32	NO	yes	inborn	2	37
post	SURVIVED	1455	32	NO	no	inborn	2
post	SURVIVED	1565	32	NO	yes		2	35.2
post	SURVIVED	2500	32	NO	yes	inborn	2	36
post	SURVIVED	1405	32	NO	no	inborn	2
post	SURVIVED	3000	32	NO	yes	inborn	2	35
post	SURVIVED		32	NO	no	inborn	2
post	SURVIVED	2055	32	NO	yes	inborn	2	36.5
post	SURVIVED	2115	32	NO	yes		1	36
post	SURVIVED	1810	32	YES	yes		1	36
post	SURVIVED	1700	32	NO	no		2
post	SURVIVED	2400	32	NO	no		2
post	SURVIVED	2165	32	NO	no		2
post	SURVIVED	1960	32	NO	no		2
post	SURVIVED	2200	32	NO	yes		2	37.9
post	SURVIVED	2100	32	YES	yes	inborn	1
post	SURVIVED	1900	32	YES	yes	inborn	1
post	SURVIVED	2200	32	YES	yes	referred	1
post	SURVIVED	2000	32	YES	yes	inborn	1
post	SURVIVED	2300	32	YES	yes	inborn	1
post	SURVIVED	1500	32	YES	yes	inborn	1
post	SURVIVED	1700	32	YES	yes	inborn	1	37.1
post	SURVIVED	2300	32	YES	yes	inborn	1
post	SURVIVED	2200	32	YES	yes	inborn	1	37.1
post	SURVIVED	2300	32	YES	yes	referred	1
post	SURVIVED	1850	32	YES	yes	inborn	1
post	SURVIVED	2000	32	NO	yes	referred	1
post	SURVIVED	1600	32	YES	yes	inborn	1	37.4
post	SURVIVED	2200	32	NO	yes	referred	1
post	SURVIVED	1400	32	YES	yes	inborn	1
post	SURVIVED	2400	32	YES	yes	inborn	1
post	SURVIVED	1450	32	YES	yes	referred	1
post	SURVIVED	1350	32	YES	yes	referred	1
post	SURVIVED	1900	32	YES	yes	inborn	1	36.5
post	SURVIVED	1200	32	YES	yes	referred	1	36.5
post	SURVIVED	2200	32	YES	yes	referred	1	37.2
post	SURVIVED	1800	32	YES	yes	inborn	1	36.9
post	SURVIVED	2300	32	YES	yes	referred	1	37
post	SURVIVED	2000	32	YES	yes	referred	1
post	SURVIVED	1900	32	YES	yes	referred	1
post	SURVIVED	1900	32	YES	yes	inborn	1	36.8
post	SURVIVED	1900	32	YES	yes	referred	1	36.9
post	SURVIVED	1030	32	YES	yes	referred	1
post	SURVIVED	1700	32	YES	yes	inborn	1
post	SURVIVED	1900	32	YES	yes	referred	1	37.2
post	SURVIVED	1600	32	YES	yes	referred	1
post	SURVIVED	1700	32	YES	yes	inborn	1
post	SURVIVED	2250	32	YES	yes	inborn	1
post	SURVIVED	1500	32	YES	yes	inborn	1
post	SURVIVED	1900	32	YES	yes	referred	1
post	SURVIVED	1500	32	YES	yes	referred	1	37
post	SURVIVED	2000	32	YES	yes	referred	2	36.7
post	SURVIVED	2200	32	YES	yes	referred	2	36.6
post	SURVIVED	1500	32	YES	yes	inborn	1
post	SURVIVED	1300	32	YES	yes	referred	1
post	SURVIVED	2200	32	YES	yes	inborn	1	36.7
post	SURVIVED	1000	32	YES	yes	referred	1	37.1
post	SURVIVED	1500	32	YES	yes	inborn	1	36.4
post	SURVIVED	1600	32	YES	yes	referred	1
post	SURVIVED	1650	32	YES	yes	referred	1	36.9
post	SURVIVED	1200	32	YES	yes	inborn	1
post	SURVIVED	1800	32	YES	yes	referred	1
post	SURVIVED	1550	32	YES	yes	inborn	1	36.4
post	SURVIVED	1800	32	YES	yes	inborn	1	36.8
post	SURVIVED	1500	32	YES	yes	inborn	1	36.6
post	SURVIVED	1700	32	YES	yes	inborn	1
post	SURVIVED	2000	32	YES	yes	referred	1	36.7
post	SURVIVED	1600	32	YES	yes	referred	1	37.2
post	SURVIVED	1300	32	YES	yes	inborn	1
post	SURVIVED	1300	32	YES	yes	referred	1
post	SURVIVED	1800	32	YES	yes	referred	1
post	SURVIVED	1900	32	YES	yes	inborn	1	36.8
post	SURVIVED	1800	32	YES	yes	inborn	1	36.6
post	SURVIVED	1900	32	NO	yes	referred	2	36.7
post	SURVIVED	2100	32	YES	yes	referred	2	36.5
post	SURVIVED	1900	32	YES	yes	referred	2	36.5
post	SURVIVED	1600	32	YES	yes	inborn	1
post	SURVIVED	2000	32	YES	yes	inborn	1
post	SURVIVED	1700	32	YES	yes	referred	1	36.9
post	SURVIVED	1700	32	YES	yes	referred	1	37.2
post	SURVIVED	1500	32	YES	yes	inborn	1	36.8
post	SURVIVED	1700	32	YES	yes	inborn	1	36.7
post	SURVIVED	1800	32	YES	yes	referred	1
post	SURVIVED	1600	32	YES	yes	inborn	1	36.8
post	SURVIVED	2200	32	YES	yes	inborn	1	36.9
post	SURVIVED	1900	32	YES	yes	referred	2	36.5
post	SURVIVED	1700	32	YES	yes	inborn	1	36
post	SURVIVED	1300	32	YES	yes	referred	1
post	SURVIVED	1100	32	YES	yes	inborn	1	36.4
post	SURVIVED	1600	32	YES	yes	referred	2	36.9
post	SURVIVED	1700	32	YES	yes	referred	1	36.9
post	SURVIVED	2000	32	YES	yes	inborn	2	36.5
post	SURVIVED	1600	32	YES	yes	referred	1	35.9
post	SURVIVED	1600	32	YES	yes	referred	2	37.1
post	SURVIVED	2050	32	YES	yes	referred	2	36.7
post	SURVIVED	1700	32	YES	yes	inborn	2	36.9
post	SURVIVED	2000	32	YES	yes	inborn	1
post	SURVIVED	2400	32	YES	yes	referred	1
post	SURVIVED	2300	32	YES	yes	referred	2	36.5
post	SURVIVED	1700	32	YES	yes	referred	1
post	SURVIVED	1800	32	YES	yes	inborn	1	37.2
post	SURVIVED	1900	32	YES	yes	referred	1
post	SURVIVED	1900	32	NO	yes	referred	1
post	SURVIVED	2000	32	YES	yes	inborn	1
post	SURVIVED	1800	32	YES	yes	inborn	2	36.7
post	SURVIVED	1400	32	YES	yes	referred	2	36.9
post	SURVIVED	2300	32	NO	yes	referred	2	36.8
post	SURVIVED	2200	32	YES	yes	referred	2
post	SURVIVED	2100	32	NO	yes	referred	2	36.6
post	SURVIVED	2000	32	YES	yes	referred	1
post	SURVIVED	1700	32	YES	yes	referred	2	36.4
post	SURVIVED	1650	32	YES	yes	inborn	1	37.3
post	SURVIVED	2100	32	NO	yes	referred	1
post	SURVIVED	2200	32	YES	yes	inborn	2	36.8
post	SURVIVED	1300	32	YES	yes	referred	2	37.2
post	SURVIVED	1300	32	YES	yes	referred	2	36.9
post	SURVIVED	1900	32	NO	yes	referred	2	36.6
post	SURVIVED	1400	32	YES	yes	referred	2	36.8
post	SURVIVED	1200	32	YES	yes	referred	2	36.5
post	SURVIVED	1900	32	YES	yes	inborn	1
post	SURVIVED	2000	32	YES	yes	referred	2	37
post	SURVIVED	1500	32	YES	yes	inborn	1
post	SURVIVED	1700	32	YES	yes	inborn	2	36.6
post	SURVIVED	1800	32	YES	yes	inborn	2	37.3
post	SURVIVED	2000	32	NO	yes	referred	2	37.2
post	SURVIVED	2000	32	YES	yes	referred	2	36.7
post	SURVIVED	1200	32	YES	yes	inborn	1
post	SURVIVED	1300	32	YES	yes	inborn	2	37.1
post	SURVIVED	2000	32	YES	yes	referred	2	36.6
post	SURVIVED	1900	32	YES	yes	referred	2	37.3
post	SURVIVED	1700	32	YES	yes	referred	2	36.5
post	SURVIVED	2000	32	YES	yes	referred	2	37.3
post	SURVIVED	2000	32	YES	yes	referred	2	36.8
post	SURVIVED	2100	32	NO	yes	referred	2	36.6
post	SURVIVED	2050	32	YES	yes	inborn	1
post	SURVIVED	2050	32	YES	yes	referred	2	36.8
post	SURVIVED	2000	32	YES	yes	inborn	2	36.9
post	SURVIVED	2400	32	NO	yes	referred	1
post	SURVIVED	1900	32	NO	yes	referred	1
post	SURVIVED	2100	32	YES	yes	referred	2	36.7
post	SURVIVED	1000	32	NO	yes	referred	2	37.1
post	SURVIVED	1000	32	NO	yes	referred	2	36.8
post	SURVIVED	2000	32	YES	yes	inborn	1
post	SURVIVED	2200	32	YES	yes	referred	1
post	SURVIVED	1200	32	YES	yes	referred	2	36.6
post	SURVIVED	1900	32	YES	yes	referred	2	36.8
post	SURVIVED	2000	32	YES	yes	inborn	1
post	SURVIVED	1300	32	YES	yes	referred	2	36.5
post	SURVIVED	2200	32	YES	yes	referred	1
post	SURVIVED	2300	32	YES	yes	referred	1
post	SURVIVED	1950	32	YES	yes	inborn	2
post	SURVIVED	2000	32	YES	yes	referred	2	37.1
post	SURVIVED	1700	32	YES	yes	referred	2	36.8
post	SURVIVED	1000	32	YES	yes	referred	2	37.4
post	SURVIVED	1100	32	YES	yes	referred	2	36.9
post	SURVIVED	2000	32	YES	yes	inborn	2
post	SURVIVED	1900	32	YES	yes	referred	2
post	SURVIVED	2300	32	YES	yes	inborn	2	37.3
post	SURVIVED	2100	32	YES	yes	referred	2
post	SURVIVED	1000	32	YES	yes	inborn	1
post	SURVIVED	1850	32	YES	yes	inborn	2	36.8
post	SURVIVED	2000	32	YES	yes	inborn	2	37.2
post	SURVIVED	1450	32	YES	yes	referred	2	36.6
post	SURVIVED	2100	32	YES	yes	referred	1
post	SURVIVED	1250	32	YES	yes	inborn	1
post	SURVIVED	1400	32	YES	yes	inborn	1
post	SURVIVED	1300	32	YES	yes	inborn	1
post	SURVIVED	1800	32	YES	yes	inborn	1
post	SURVIVED	1550	32	YES	yes	referred	1	37.1
post	SURVIVED	900	32	YES	yes	referred	1	37.1
post	SURVIVED	1100	32	YES	yes	referred	1	36.7
post	SURVIVED	1350	32	NO	no	referred	2
post	SURVIVED	2100	32	NO	no	referred	2
post	SURVIVED	1250	32	NO	no	referred	2
post	SURVIVED	1500	32	YES	yes	inborn	1	36.1
post	SURVIVED	4500	32	YES	yes	inborn	1	35.6
post	SURVIVED	2000	32	NO	no	referred	2
post	SURVIVED	2250	32	YES	yes	inborn	1	36
post	SURVIVED	1900	32	YES	yes	inborn	1	36
post	SURVIVED	2500	32	YES	yes	inborn	1	36
post	SURVIVED	1650	32	YES	yes	referred	1	35.8
post	SURVIVED	1350	32	YES	yes	inborn	1	35.9
post	SURVIVED	2150	32	NO	no	referred	2
post	SURVIVED	2100	32	NO	no	referred	2
post	SURVIVED	1300	32	YES	yes	referred	1	36.2
post	SURVIVED	1950	32	YES	yes	referred	1	36
post	SURVIVED	2200	32	YES	yes	referred	1	36
post	SURVIVED	1650	32	YES	yes	inborn	1	36.1
post	SURVIVED	1300	32	YES	yes	inborn	1	35.8
post	SURVIVED	1800	32	YES	yes	inborn	1	35.8
post	SURVIVED	1750	32	YES	yes	inborn	1	36
post	SURVIVED	1150	32	YES	yes	inborn	1	36
post	SURVIVED	1450	32	YES	yes	inborn	2	36.7
post	SURVIVED	1700	32	YES	yes	inborn	2	36
post	SURVIVED	1900	32	YES	yes	inborn	2	36.5
post	SURVIVED	1700	32	YES	yes	inborn	1	36
post	SURVIVED	1900	32	YES	yes	inborn	1	37
post	SURVIVED	1400	32	YES	yes	inborn	1	36
post	SURVIVED	1000	32	YES	yes	inborn	1	36
pre	SURVIVED	2200	33	YES	yes	referred	1	36.7
pre	SURVIVED	2500	33	YES	no	referred	2
pre	SURVIVED	1900	33	YES	yes	inborn	1
pre	SURVIVED	2400	33	YES	yes	inborn	1
pre	SURVIVED	1250	33	NO	no	inborn	2
pre	SURVIVED	1400	33	YES	yes	referred	1
pre	SURVIVED	2000	33	NO	no	referred	2
pre	SURVIVED	2000	33	NO	no	inborn	2
pre	SURVIVED	2100	33	NO	no	referred	2
pre	SURVIVED	2300	33	YES	yes	inborn	1	36.5
pre	SURVIVED	2350	33	NO	no	inborn	2
pre	SURVIVED	1850	33	YES	yes	inborn	1	36
pre	SURVIVED	2400	33	NO	no	inborn	2
pre	SURVIVED	1900	33	YES	yes	inborn	1	37
pre	SURVIVED	2200	33	YES	yes	referred	1	37
pre	SURVIVED	2500	33	NO	no	inborn	2
pre	SURVIVED	2300	33	YES	yes	referred	1	35.5
pre	SURVIVED	2800	33	NO	no	inborn	2
pre	SURVIVED	2200	34	YES	yes	inborn	1
pre	SURVIVED	1100	34	NO	no	inborn	2
pre	SURVIVED	1700	34	NO	no	inborn	2
pre	SURVIVED	1850	34	NO	no	inborn	2
pre	SURVIVED	2850	34	NO	no	inborn	2
pre	SURVIVED	1850	34	NO	no	referred	2
pre	SURVIVED	2400	34	YES	yes	referred	1
pre	SURVIVED	2000	34	NO	no	referred	2
pre	SURVIVED	1289	34	NO	no	referred	2
pre	SURVIVED	2100	34	YES	yes	inborn	1
pre	SURVIVED	2100	34	YES	yes	referred	1
pre	SURVIVED	2000	34	YES	yes	inborn	1
pre	SURVIVED	2000	34	NO	no	inborn	2
pre	SURVIVED	1600	34	YES	yes	referred	1	36.4
pre	SURVIVED	2000	34	NO	no	inborn	2
pre	SURVIVED	1600	34	YES	yes	inborn	1
pre	SURVIVED	1900	34	YES	yes	inborn	1	36
pre	SURVIVED	2550	34	YES	yes	referred	1	36
pre	SURVIVED	2000	34	YES	yes	inborn	1	35.8
pre	SURVIVED	2100	34	YES	yes	referred	1	36.5
pre	SURVIVED	2000	34	NO	no	inborn	2
pre	SURVIVED	2600	34	NO	no	inborn	2
pre	SURVIVED	2100	34	YES	yes	referred	1	36
pre	SURVIVED	1700	33	NO	no	referred	2
pre	SURVIVED	1750	33	NO	no	inborn	2
pre	SURVIVED	1950	33	YES	no	inborn	2
pre	SURVIVED	1760	33	NO	no	inborn	2
pre	SURVIVED	1700	33	NO	no	inborn	2
pre	SURVIVED	1500	33	NO	no	referred	2
pre	SURVIVED	1470	33	NO	no	referred	1
pre	SURVIVED	1900	33	YES	no	referred	2
pre	SURVIVED	1750	33	NO	no	inborn	2
pre	SURVIVED	1600	33	NO	no	referred	2
pre	SURVIVED	1700	33	NO	no	referred	2
pre	SURVIVED	1980	33	YES	no	referred	2
pre	SURVIVED	1830	33	NO	no	referred	2
pre	SURVIVED	1300	33	NO	no	inborn	1
pre	SURVIVED	1200	34	NO	no	inborn	2
pre	SURVIVED	1300	34	NO	no	inborn	1
pre	SURVIVED	1200	34	NO	no	referred	2
pre	SURVIVED	1800	34	NO	no	referred	2
pre	SURVIVED	1600	34	NO	no	referred	2
pre	SURVIVED	1800	34	NO	no	inborn	2
pre	SURVIVED	1900	34	YES	no	referred	2
pre	SURVIVED	1400	34	NO	no	inborn	1
pre	SURVIVED	1700	34	NO	no	referred	2
pre	SURVIVED	1800	34	NO	no	referred	2
pre	SURVIVED	1800	34	NO	no	referred	2
pre	SURVIVED	1530	34	NO	no	referred	2
pre	SURVIVED	1700	34	NO	no	referred	1
pre	SURVIVED	1500	34	NO	no	referred	2
pre	SURVIVED	1900	34	YES	no	referred	1
pre	SURVIVED	1980	34	YES	no	referred	1
pre	SURVIVED	1950	34	YES	no	referred	2
pre	SURVIVED	1800	34	NO	no	referred	1
pre	SURVIVED	1800	34	NO	no	referred	2
pre	SURVIVED	1500	34	NO	no	referred	2
pre	SURVIVED	2800	34	YES	yes	inborn	2
pre	SURVIVED	1400	34	NO	no	inborn	2
pre	SURVIVED	1900	34	YES	no	referred	1
pre	SURVIVED	1200	34	NO	no	inborn	2
pre	SURVIVED	1850	34	NO	no	inborn	2
pre	SURVIVED	1800	34	NO	no	referred	2
pre	SURVIVED	2150	33	NO	no	inborn	2
pre	SURVIVED	1600	33	YES	yes	referred	1	35.6
pre	SURVIVED	1800	33	NO	no	inborn	2
pre	SURVIVED	1800	33	YES	yes	inborn	1	35.8
pre	SURVIVED	2100	33	YES	yes	inborn	1	36
pre	SURVIVED	1700	33	NO	no	inborn	2
pre	SURVIVED	2400	33	NO	no	inborn	2
pre	SURVIVED	2000	33	YES	yes	referred	1	36
pre	SURVIVED	1750	33	YES	yes	referred	2	35.4
pre	SURVIVED	1800	33	YES	yes	inborn	1	36
pre	SURVIVED	2400	33	YES	yes	referred	1	36
pre	SURVIVED	2450	34	YES	yes	inborn	1	36
pre	SURVIVED	2100	34	YES	yes	inborn	1	36.5
pre	SURVIVED	2000	34	YES	yes	inborn	1	35.8
pre	SURVIVED	1900	34	YES	yes	referred	1	36
pre	SURVIVED	1950	34	YES	yes	referred	1	36
pre	SURVIVED	2200	34	NO	no	inborn	2
pre	SURVIVED	2000	34	NO	no	inborn	2
pre	SURVIVED	1800	34	NO	no	referred	2
pre	SURVIVED	2000	34	NO	no	referred	2
pre	SURVIVED	2700	34	NO	no	referred	2
pre	SURVIVED	1800	34	NO	no	referred	2
pre	SURVIVED	2400	34	NO	no	referred	2
pre	SURVIVED	1800	34	NO	no	referred	2
pre	SURVIVED	1500	34	YES	yes	referred	1	36
pre	SURVIVED	1800	34	NO	no	referred	2	35.7
pre	SURVIVED	1600	34	YES	yes	referred	1
pre	SURVIVED	2200	34	YES	yes	inborn	1	36
pre	SURVIVED	2200	34	YES	yes	referred	1	36
pre	SURVIVED	2400	34	YES	yes	referred	1	36
pre	SURVIVED	2100	34	YES	yes	referred	1	36
pre	SURVIVED	1600	34	YES	yes	inborn	1	36.2
pre	SURVIVED	1800	34	YES	yes	referred	1	36.1
pre	SURVIVED	2000	34	YES	yes	referred	1	35.9
pre	SURVIVED	1900	33	YES	yes	inborn	2	36.2
pre	SURVIVED	1300	34	YES	no	inborn	2	36.2
pre	SURVIVED	1500	34	YES	no	inborn	2	36.2
pre	SURVIVED	1900	33	NO	yes	inborn	2	36
pre	SURVIVED	1890	33	NO	yes	inborn	1	34.7
pre	SURVIVED	1790	33	NO	yes	inborn	1	35.4
pre	SURVIVED	1890	33	NO	yes	inborn	2
pre	SURVIVED	2150	33	NO	yes	inborn	2
pre	SURVIVED	1990	33	NO	no	inborn	2
pre	SURVIVED	1910	33	NO	no		2
pre	SURVIVED	1700	33	NO	no	inborn	2
pre	SURVIVED	1890	33	NO	no	inborn	2
pre	SURVIVED	1630	33	NO	no		2
pre	SURVIVED	1030	34	NO	yes	inborn	2
pre	SURVIVED	2370	34	NO	no	inborn	2
pre	SURVIVED	2300	34	NO	no	inborn	2
pre	SURVIVED	2260	34	NO	no	inborn	2
pre	SURVIVED	1950	34	NO	no	inborn	2
pre	SURVIVED	1800	34	NO	no	inborn	2
pre	SURVIVED	1640	34	NO	no	inborn	2
pre	SURVIVED	2100	34	NO	no	inborn	2
pre	SURVIVED	2140	34	NO	no	inborn	2
pre	SURVIVED	1640	34	NO	no	inborn	2
pre	SURVIVED	1780	34	NO	no	inborn	2
post	SURVIVED	2200	33	NO	yes	referred	1	37.3
post	SURVIVED	2260	33	NO	yes		1	36.6
post	SURVIVED	1400	33	NO	yes		1	36.4
post	SURVIVED	1700	33	NO	yes		1	36.5
post	SURVIVED	1750	33	YES	yes	referred	2	36.8
post	SURVIVED	1300	33	NO	yes	referred	2	36.3
post	SURVIVED	1250	33	NO	yes	referred	1	36.3
post	SURVIVED	1350	33	NO	yes		2	36.2
post	SURVIVED	1350	33	NO	yes	inborn	2	35.9
post	SURVIVED	1200	33	NO	yes	inborn	1	36.8
post	SURVIVED	2800	33	YES	yes		1	37.1
post	SURVIVED	1250	33	NO	yes	referred	2	36.1
post	SURVIVED	1900	33	YES	yes		1	36.8
post	SURVIVED	1300	33	NO	yes	referred	2	35.9
post	SURVIVED	1900	33	YES	yes	inborn	1	36.5
post	SURVIVED	1950	33	YES	no		1	37.4
post	SURVIVED	2350	33	YES	no		1	36.6
post	SURVIVED	1400	33	YES	no	inborn	1	36.6
post	SURVIVED	2000	33	YES	no	referred	1	37
post	SURVIVED	2100	33	YES	no	referred	1	36.5
post	SURVIVED	1210	33	YES	no	inborn	1	36.6
post	SURVIVED	2400	33	YES	no		1	35.7
post	SURVIVED	1750	33	YES	no	referred	1	36.2
post	SURVIVED	2200	33	YES	yes	referred	2	36
post	SURVIVED	2720	33	YES	no	referred	1	37.1
[truncated: 2,707 more rows]

## Sheet: surv_died3496
IMPLEMENTATION	OUTCOME	BIRTH WEIGT	GA	AnteNatalSteroids	Neonatal Antibiotics	INBORN VS.OUTBORN	MATERNAL Antibiotics	INITIAL TEMPERATURE
pre	DEATH	800	24	NO	no	inborn	no
post	SURVIVED	1000	25	NO	yes	referred	yes	35
post	SURVIVED	1600	26	NO	yes	referred	yes	35.8
post	DEATH	700	26	YES	yes	inborn	yes	35.6
pre	SURVIVED	1500	26	NO	no	referred	no
pre	SURVIVED	1100	26	NO	no	inborn	no
pre	DEATH	1100	26	NO	no	inborn	no
post	DEATH	1000	26	NO	yes		no	36.7
post	DEATH	600	26	NO	no	referred	no
post	DEATH	800	26	NO	no	referred	no
post	SURVIVED	1200	27	YES	yes	inborn	yes	36.2
post	SURVIVED	1700	27	NO	yes	referred	yes	39
post	SURVIVED	1200	27	YES	yes	inborn	yes	35.6
post	DEATH	1200	27	NO	no	inborn	yes	36
pre	SURVIVED	1750	27	NO	no	inborn	no
pre	SURVIVED	1200	27	NO	no	inborn	no
post	SURVIVED	900	27	NO	yes		no	35.2
post	SURVIVED	1480	27	NO	yes		no	36.1
post	SURVIVED	900	27	NO	no	inborn	no	37
pre	DEATH	1000	27	NO	no	inborn	no
pre	DEATH	950	27	NO	no	inborn	no
post	DEATH	1250	27	NO	no	referred	no
post	DEATH	1100	27	NO	no	referred	no
post	DEATH	800	27	NO	no	referred	no	36.4
post	DEATH	1300	27	NO	no	referred	no
post	DEATH	1700	27	NO	no	referred	no
post	DEATH	1400	27	NO	no	referred	no
post	DEATH	800	27	NO	yes	inborn	no	37
pre	SURVIVED	2100	28	YES	yes	inborn	yes
pre	SURVIVED	1600	28	YES	yes	referred	yes	36
pre	SURVIVED	1000	28	NO	no	referred	yes
pre	SURVIVED	1400	28	NO	no	referred	yes
pre	SURVIVED	1450	28	NO	no	inborn	yes
pre	SURVIVED	1300	28	NO	no	referred	yes
pre	SURVIVED	1500	28	NO	no	referred	yes
pre	SURVIVED	1700	28	NO	no	referred	yes
pre	SURVIVED	1200	28	NO	no	inborn	yes
pre	SURVIVED	1200	28	YES	yes	inborn	yes	35
pre	SURVIVED	1200	28	YES	yes	referred	yes	36.5
pre	SURVIVED	1700	28	YES	yes	referred	yes	36
post	SURVIVED	860	28	YES	yes	referred	yes	36.2
post	SURVIVED	950	28	YES	yes	referred	yes	36.4
post	SURVIVED	900	28	NO	yes	referred	yes	35.8
post	SURVIVED	850	28	YES	yes	inborn	yes	35.9
post	SURVIVED	900	28	NO	yes	referred	yes	36.1
post	SURVIVED	850	28	YES	yes	referred	yes	37.2
post	SURVIVED	740	28	YES	yes	inborn	yes	37.3
post	SURVIVED	900	28	YES	yes	referred	yes	36.6
post	SURVIVED	1200	28	NO	yes	inborn	yes	35.7
post	SURVIVED	1300	28	YES	yes	inborn	yes	37
post	SURVIVED	1150	28	YES	yes	referred	yes	36
post	SURVIVED	1030	28	YES	yes	inborn	yes	36.6
post	SURVIVED	1100	28	YES	yes	referred	yes	36.1
post	SURVIVED	1300	28	YES	yes	inborn	yes	36.4
post	SURVIVED	1400	28	YES	yes	inborn	yes	36.3
post	SURVIVED	1000	28	YES	yes	inborn	yes	36.9
post	SURVIVED	1200	28	YES	yes	referred	yes	36.8
post	SURVIVED	2400	28	YES	yes	referred	yes	36.6
post	SURVIVED	1700	28	NO	no	referred	yes	36
post	SURVIVED	900	28	YES	yes	inborn	yes	36.8
post	SURVIVED	450	28	YES	yes	inborn	yes	36.8
post	SURVIVED	400	28	YES	yes	inborn	yes	36.8
post	SURVIVED	1600	28	YES	yes	referred	yes	36.6
post	SURVIVED	1100	28	YES	yes	inborn	yes	36.8
post	SURVIVED	2080	28	NO	no	referred	yes	35.7
post	SURVIVED	1500	28	YES	yes	referred	yes	36.5
post	SURVIVED	1100	28	NO	no	referred	yes
post	SURVIVED	1200	28	YES	yes	referred	yes	36.6
post	SURVIVED	1600	28	NO	no	referred	yes	36
post	SURVIVED	1200	28	YES	yes	referred	yes	36.6
post	SURVIVED	700	28	YES	yes	inborn	yes	36.8
post	SURVIVED	1700	28	YES	yes	inborn	yes	36.8
post	SURVIVED	1300	28	YES	yes	inborn	yes	36.9
post	SURVIVED	1000	28	NO	no	referred	yes	36.4
post	SURVIVED	1600	28	YES	yes	inborn	yes	36.8
post	SURVIVED	1400	28	YES	yes	inborn	yes	36.9
post	SURVIVED	2050	28	YES	yes	inborn	yes	36.8
post	SURVIVED	1100	28	YES	yes	inborn	yes	36.8
post	SURVIVED	1700	28	YES	yes	inborn	yes	36.9
post	SURVIVED	850	28	YES	yes	inborn	yes	36.8
post	SURVIVED	1250	28	YES	yes	inborn	yes	36.9
post	SURVIVED	1700	28	YES	yes	referred	yes	36.5
post	SURVIVED	1000	28	YES	yes	referred	yes	37.3
post	SURVIVED	2000	28	YES	yes	inborn	yes	36.8
post	SURVIVED	1000	28	YES	yes	inborn	yes	36.8
post	SURVIVED	1700	28	YES	yes	referred	yes	36
post	SURVIVED	1900	28	YES	yes	referred	yes	35.5
post	SURVIVED	2200	28	YES	yes	referred	yes	35.4
post	SURVIVED	1000	28	YES	yes	referred	yes	36
post	SURVIVED	1150	28	YES	yes	referred	yes	36
post	SURVIVED	1300	28	YES	no	inborn	yes	35.7
post	SURVIVED	1350	28	YES	yes		yes	35.9
post	SURVIVED	1000	28	YES	yes		yes	36
post	SURVIVED		28	NO	no	inborn	yes
post	SURVIVED	1540	28	YES	yes		yes	36.7
post	SURVIVED	1420	28	YES	yes		yes	36
post	SURVIVED	1500	28	YES	yes	referred	yes	35.9
post	SURVIVED	2000	28	YES	yes	referred	yes
post	SURVIVED	1400	28	YES	yes	referred	yes
post	SURVIVED	1920	28	YES	yes	inborn	yes	36.9
post	SURVIVED	950	28	YES	yes	inborn	yes	36.4
post	SURVIVED	1000	28	YES	yes	inborn	yes	37.3
post	SURVIVED	1000	28	YES	yes	referred	yes	36.8
post	SURVIVED	1700	28	YES	yes	inborn	yes
post	SURVIVED	1900	28	YES	yes	inborn	yes	36.8
post	SURVIVED	1000	28	YES	yes	referred	yes	37.3
post	SURVIVED	1600	28	YES	yes	referred	yes	37
post	SURVIVED	1000	28	YES	yes	inborn	yes	36.9
post	SURVIVED	1000	28	YES	yes	inborn	yes
post	SURVIVED	1400	28	YES	yes	referred	yes	36.9
post	SURVIVED	1300	28	YES	yes	inborn	yes
post	SURVIVED	900	28	YES	yes	inborn	yes	36.3
post	SURVIVED	1300	28	YES	yes	referred	yes
post	SURVIVED	1000	28	YES	yes	inborn	yes	37.3
post	SURVIVED	1200	28	YES	yes	referred	yes
post	SURVIVED	1000	28	YES	yes	inborn	yes	36.9
post	SURVIVED	500	28	YES	yes	inborn	yes	36.3
post	SURVIVED	1700	28	YES	yes	inborn	yes
post	SURVIVED	1600	28	YES	yes	inborn	yes
post	SURVIVED	1800	28	YES	yes	inborn	yes	37.4
post	SURVIVED	2200	28	YES	yes	inborn	yes	36.9
post	SURVIVED	1300	28	YES	yes	inborn	yes
post	SURVIVED	1800	28	YES	yes	inborn	yes
post	SURVIVED	1700	28	NO	yes	referred	yes
post	SURVIVED	650	28	YES	yes	inborn	yes	36.7
post	SURVIVED	2000	28	YES	yes	referred	yes
post	SURVIVED	1250	28	YES	yes	referred	yes
post	SURVIVED	1400	28	YES	yes	referred	yes
post	SURVIVED	1000	28	YES	yes	inborn	yes
post	SURVIVED	1000	28	YES	yes	inborn	yes
post	SURVIVED	1200	28	YES	yes	referred	yes
post	SURVIVED	2100	28	YES	yes	referred	yes
post	SURVIVED	1200	28	YES	yes	inborn	yes
post	SURVIVED	1200	28	YES	yes	inborn	yes
post	SURVIVED	700	28	YES	yes	inborn	yes
post	SURVIVED	800	28	YES	yes	inborn	yes	36.7
post	SURVIVED	1900	28	YES	yes	referred	yes
post	SURVIVED	1050	28	YES	yes	inborn	yes	37.4
post	SURVIVED	1100	28	NO	yes	referred	yes	35.7
post	SURVIVED	1000	28	NO	yes	referred	yes	35.6
post	SURVIVED	1000	28	NO	yes	referred	yes	35.6
post	SURVIVED	1300	28	YES	yes	inborn	yes	36
post	SURVIVED	1300	28	YES	yes	referred	yes	35.5
post	SURVIVED	1400	28	YES	no	inborn	yes	35.8
post	SURVIVED	1500	28	YES	yes	inborn	yes	36
post	SURVIVED	1300	28	YES	no	inborn	yes	36
post	SURVIVED	1350	28	YES	yes	inborn	yes	37
post	SURVIVED	1250	28	YES	yes	inborn	yes	37
post	SURVIVED	1700	28	YES	yes	inborn	yes	36.2
post	SURVIVED	1600	28	YES	yes	inborn	yes	36
pre	DEATH	1200	28	YES	yes	inborn	yes	37
pre	DEATH	900	28	NO	no	referred	yes
post	DEATH	910	28	YES	yes	referred	yes	36.2
post	DEATH	950	28	NO	yes	referred	yes	36.9
post	DEATH	700	28	NO	yes	referred	yes	37.2
post	DEATH	810	28	NO	yes		yes	36.2
post	DEATH	950	28	YES	no		yes	37.1
post	DEATH	1000	28	YES	yes	referred	yes	36.8
post	DEATH	800	28	YES	yes		yes	36
post	DEATH	900	28	YES	yes		yes	36.5
post	DEATH	900	28	YES	no	referred	yes	35.9
post	DEATH	700	28	YES	no	inborn	yes	37.1
post	DEATH	2100	28	YES	yes	referred	yes	35
post	DEATH	1400	28	YES	yes	inborn	yes	36.8
post	DEATH	750	28	YES	yes	inborn	yes	36.6
post	DEATH	950	28	YES	yes	inborn	yes	36.2
post	DEATH	1150	28	YES	yes	inborn	yes	36.3
post	DEATH	1350	28	YES	yes	inborn	yes	36.5
post	DEATH	1100	28	YES	yes	inborn	yes	36.7
post	DEATH	1030	28	YES	yes	referred	yes	36.7
post	DEATH	600	28	NO	no	referred	yes	35.7
post	DEATH	800	28	YES	yes	referred	yes	36.6
post	DEATH	1100	28	NO	no	referred	yes	35.7
post	DEATH	900	28	NO	no	referred	yes	36.3
post	DEATH	1000	28	NO	no	referred	yes	36.3
post	DEATH	1200	28	YES	yes	inborn	yes	37.3
post	DEATH	1500	28	YES	yes	inborn	yes	36.9
post	DEATH	1100	28	YES	yes	referred	yes	36.6
post	DEATH	700	28	YES	yes	referred	yes	36.5
post	DEATH	1200	28	YES	yes	inborn	yes	36.9
post	DEATH	750	28	YES	yes	inborn	yes	36.8
post	DEATH	800	28	NO	no	referred	yes	36.4
post	DEATH	950	28	NO	yes	inborn	yes	35
post	DEATH	1000	28	NO	yes	inborn	yes	35.5
post	DEATH	2200	28	NO	yes	inborn	yes	35
post	DEATH	1770	28	NO	yes		yes	34
post	DEATH	900	28	YES	yes	referred	yes	36.6
post	DEATH	1000	28	YES	yes	inborn	yes	36.9
post	DEATH	1200	28	YES	yes	referred	yes	35.9
post	DEATH	1300	28	YES	yes	inborn	yes	36.6
post	DEATH	750	28	YES	yes	inborn	yes	36.8
post	DEATH	1100	28	YES	yes	inborn	yes	36.9
post	DEATH	1000	28	YES	yes	inborn	yes	36.8
post	DEATH	1000	28	YES	yes	inborn	yes	36.6
post	DEATH	1000	28	YES	no	inborn	yes	36.9
post	DEATH	1500	28	NO	no	referred	yes
post	DEATH	600	28	YES	no	inborn	yes	36.4
post	DEATH	1000	28	YES	no	referred	yes
post	DEATH	1000	28	YES	no	referred	yes
post	DEATH	1300	28	YES	yes	inborn	yes	36.7
pre	SURVIVED	1100	28	NO	no	inborn	no
pre	SURVIVED	1150	28	NO	no	referred	no
pre	SURVIVED	1600	28	NO	no	referred	no
pre	SURVIVED	1600	28	NO	no	referred	no
pre	SURVIVED	1650	28	NO	no	inborn	no
pre	SURVIVED	1500	28	NO	no	inborn	no
pre	SURVIVED	1400	28	YES	yes	inborn	no
pre	SURVIVED	1550	28	NO	no	inborn	no
pre	SURVIVED	900	28	NO	no	inborn	no
pre	SURVIVED	1100	28	NO	no	inborn	no
pre	SURVIVED	1600	28	NO	no	referred	no
pre	SURVIVED	1700	28	NO	no	inborn	no
pre	SURVIVED	1850	28	NO	no	inborn	no
pre	SURVIVED	900	28	NO	no	inborn	no
pre	SURVIVED	1500	28	NO	no	inborn	no
pre	SURVIVED	1300	28	NO	no	referred	no
pre	SURVIVED	1700	28	NO	no	referred	no
pre	SURVIVED	1700	28	NO	no	inborn	no
pre	SURVIVED	1900	28	YES	no	referred	no
pre	SURVIVED	2250	28	NO	no	referred	no
pre	SURVIVED	1300	28	NO	no	inborn	no
pre	SURVIVED	3400	28	NO	no	referred	no
pre	SURVIVED	1200	28	YES	no	inborn	no
pre	SURVIVED	1850	28	YES	no	inborn	no
pre	SURVIVED	1300	28	NO	no	inborn	no	36.2
pre	SURVIVED	1250	28	NO	no	inborn	no	36.2
pre	SURVIVED	1450	28	NO	no	inborn	no
pre	SURVIVED	1800	28	NO	no	inborn	no	36.2
pre	SURVIVED	2100	28	NO	no	inborn	no
pre	SURVIVED	1820	28	NO	yes	inborn	no	36
pre	SURVIVED	1350	28	NO	no	inborn	no
pre	SURVIVED	1540	28	NO	no	inborn	no
post	SURVIVED	1200	28	NO	no	referred	no
post	SURVIVED	1760	28	NO	yes	referred	no	36.1
post	SURVIVED	1800	28	YES	yes	inborn	no	36.3
post	SURVIVED	750	28	NO	no	referred	no	35.7
post	SURVIVED	900	28	NO	no	referred	no	36.3
post	SURVIVED	1400	28	NO	no	referred	no	36.4
post	SURVIVED	1550	28	YES	yes	referred	no	36.5
post	SURVIVED	950	28	NO	no	referred	no
post	SURVIVED	900	28	NO	no	referred	no
post	SURVIVED	3000	28	NO	no	referred	no
post	SURVIVED	3100	28	NO	no	inborn	no
post	SURVIVED	1800	28	NO	no	referred	no
post	SURVIVED	1400	28	NO	no	referred	no
post	SURVIVED	1250	28	YES	no	inborn	no	36.3
post	SURVIVED	1500	28	YES	yes	referred	no	37
post	SURVIVED	1650	28	YES	yes		no	36.6
post	SURVIVED	1100	28	YES	yes		no	36.2
post	SURVIVED	1900	28	YES	yes		no	36.7
post	SURVIVED	1500	28	YES	yes	referred	no	36.2
post	SURVIVED	1400	28	NO	no		no	36.4
post	SURVIVED	1900	28	NO	yes		no	33
post	SURVIVED	1330	28	NO	yes	referred	no	35
post	SURVIVED	1950	28	NO	yes	inborn	no	39.2
post	SURVIVED	1900	28	YES	yes	referred	no
post	SURVIVED	1100	28	YES	yes	referred	no	36.7
post	SURVIVED	1050	28	NO	yes	referred	no	36.9
post	SURVIVED	1000	28	YES	yes	inborn	no	37.3
post	SURVIVED	1500	28	YES	yes	referred	no	36.7
post	SURVIVED	1800	28	YES	yes	referred	no	36.9
post	SURVIVED	1800	28	YES	yes	referred	no	36.8
post	SURVIVED	1400	28	YES	yes	referred	no
post	SURVIVED	900	28	YES	yes	referred	no	36.4
post	SURVIVED	800	28	YES	yes	inborn	no	37.3
post	SURVIVED	1370	28	YES	yes	referred	no	36.9
post	SURVIVED	1100	28	YES	yes	referred	no	37.3
post	SURVIVED	1600	28	YES	yes	referred	no	36.9
post	SURVIVED	900	28	YES	yes	inborn	no
post	SURVIVED	1400	28	YES	yes	inborn	no
post	SURVIVED	1700	28	YES	yes	referred	no
post	SURVIVED	1000	28	YES	yes	inborn	no	36.5
post	SURVIVED	1000	28	YES	yes	inborn	no	36.8
post	SURVIVED	900	28	YES	yes	referred	no	37.2
post	SURVIVED	1650	28	YES	yes	inborn	no	36.9
post	SURVIVED	900	28	YES	yes	referred	no	36.8
post	SURVIVED	2200	28	NO	yes	referred	no
post	SURVIVED	1100	28	NO	yes	referred	no	36.4
post	SURVIVED	1400	28	YES	yes	inborn	no
post	SURVIVED	1400	28	YES	yes	inborn	no	37
post	SURVIVED	1200	28	NO	no	inborn	no	36.2
post	SURVIVED	1700	28	NO	no	inborn	no	36.9
pre	DEATH	1100	28	NO	no	inborn	no
pre	DEATH	1100	28	NO	no	inborn	no
pre	DEATH	1800	28	NO	no	referred	no
pre	DEATH	1000	28	NO	no	referred	no
pre	DEATH	1490	28	NO	no	referred	no
pre	DEATH	1200	28	NO	no	referred	no
pre	DEATH	800	28	YES	no	inborn	no
pre	DEATH	1300	28	NO	no	referred	no
pre	DEATH	1500	28	NO	no	referred	no
pre	DEATH	1300	28	NO	no	referred	no
pre	DEATH	1000	28	NO	no		no
post	DEATH	1060	28	NO	no	referred	no
post	DEATH	940	28	NO	no	referred	no
post	DEATH	1040	28	NO	no	referred	no
post	DEATH	1150	28	NO	no	referred	no
post	DEATH	1200	28	NO	no	referred	no
post	DEATH	1900	28	NO	no	referred	no	36.4
post	DEATH	1600	28	NO	no	referred	no	36.4
post	DEATH	800	28	YES	yes	referred	no	36.8
post	DEATH	1100	28	NO	no	referred	no
post	DEATH	1400	28	NO	no	referred	no
post	DEATH	650	28	NO	no	referred	no
post	DEATH	1100	28	YES	yes		no	36.2
post	DEATH	900	28	NO	yes	referred	no	35.1
post	DEATH	700	28	NO	yes	referred	no	35.9
post	DEATH	1000	28	YES	no	referred	no	36.1
post	DEATH	900	28	YES	no	referred	no	35.9
post	DEATH	1200	28	NO	yes	referred	no
post	DEATH	1700	28	YES	yes	referred	no
post	DEATH	1500	28	YES	no	referred	no	37.3
post	DEATH	1000	28	YES	no	inborn	no	37.1
post	DEATH	800	28	NO	yes	inborn	no	36.5
post	DEATH	1300	28	YES	yes	inborn	no	36.7
post	DEATH	1000	28	YES	no	referred	no
post	DEATH	1200	28	YES	no	referred	no
post	DEATH	1300	28	NO	no	inborn	no
post	DEATH	1800	28	NO	no	referred	no
pre	SURVIVED	1000	29	YES	no	inborn	yes
pre	SURVIVED	1500	29	YES	yes	inborn	yes
pre	SURVIVED	1100	29	YES	yes	referred	yes
pre	SURVIVED	1600	29	YES	yes	referred	yes	36.5
pre	SURVIVED	2200	29	YES	yes	referred	yes	36.2
pre	SURVIVED	1600	29	YES	yes	referred	yes	36.1
pre	SURVIVED	1370	29	YES	yes	inborn	yes	36.8
pre	SURVIVED	1900	29	YES	yes	inborn	yes	36.4
post	SURVIVED	900	29	NO	yes		yes	35.9
post	SURVIVED	1200	29	YES	yes		yes	35.9
post	SURVIVED	1260	29	YES	yes		yes	36.6
post	SURVIVED	1900	29	YES	yes	inborn	yes	36.1
post	SURVIVED	1200	29	YES	yes	inborn	yes	36
post	SURVIVED	1100	29	YES	yes	inborn	yes	36
post	SURVIVED	2000	29	YES	yes	inborn	yes	36.2
post	SURVIVED	1625	29	YES	yes		yes	37.2
post	SURVIVED	1600	29	YES	yes	inborn	yes	36.3
post	SURVIVED	1710	29	YES	yes	inborn	yes	36.4
post	SURVIVED	1500	29	YES	yes	referred	yes	36.5
post	SURVIVED	1800	29	YES	yes	referred	yes	36.6
post	SURVIVED	1000	29	YES	yes	inborn	yes	36.3
post	SURVIVED	1700	29	YES	yes	inborn	yes	36.7
post	SURVIVED	1350	29	YES	yes	referred	yes	36.6
post	SURVIVED	2150	29	NO	yes	referred	yes	36.2
post	SURVIVED	1400	29	YES	yes	referred	yes	36.5
post	SURVIVED	1820	29	YES	yes	referred	yes	36.4
post	SURVIVED	1300	29	YES	yes	inborn	yes	37
post	SURVIVED	1800	29	YES	yes	inborn	yes	37
post	SURVIVED	1400	29	YES	yes	referred	yes	36.5
post	SURVIVED	1500	29	YES	yes	referred	yes	36.6
post	SURVIVED	1200	29	YES	yes	inborn	yes	36.9
post	SURVIVED	1050	29	YES	yes	inborn	yes	36.8
post	SURVIVED	2300	29	YES	yes	inborn	yes	36.8
post	SURVIVED	2060	29	NO	no	referred	yes	36
post	SURVIVED	1600	29	NO	no	referred	yes	36
post	SURVIVED	1400	29	YES	yes	referred	yes	36.8
post	SURVIVED	2200	29	YES	yes	inborn	yes	36.8
post	SURVIVED	1200	29	YES	yes	referred	yes	36.5
post	SURVIVED	1900	29	YES	yes	referred	yes	36.8
post	SURVIVED	900	29	YES	yes	inborn	yes	36.8
post	SURVIVED	1400	29	YES	yes	inborn	yes	36.8
post	SURVIVED	2200	29	NO	no	referred	yes
post	SURVIVED	1200	29	YES	yes	referred	yes	36.5
post	SURVIVED	1350	29	NO	no	referred	yes	36
post	SURVIVED	1200	29	YES	yes	inborn	yes	36.9
post	SURVIVED	1200	29	NO	no	referred	yes	36.4
post	SURVIVED	1400	29	NO	no	referred	yes	36
post	SURVIVED	1200	29	YES	yes	referred	yes	36.6
post	SURVIVED	2100	29	YES	yes	referred	yes	36.7
post	SURVIVED	1500	29	YES	yes	inborn	yes	35.8
post	SURVIVED	1600	29	YES	yes	referred	yes	36
post	SURVIVED	1500	29	YES	yes	referred	yes	36.2
post	SURVIVED	1900	29	YES	yes	inborn	yes	35.8
post	SURVIVED	1400	29	NO	yes	referred	yes	35.7
post	SURVIVED	1200	29	NO	yes	inborn	yes	35.5
post	SURVIVED	1100	29	YES	yes	inborn	yes	36
post	SURVIVED	1250	29	YES	yes	referred	yes	35.8
post	SURVIVED	1200	29	NO	yes	inborn	yes	35
post	SURVIVED	2000	29	YES	no	inborn	yes	35.1
post	SURVIVED	1800	29	YES	no	referred	yes	36.2
post	SURVIVED	1800	29	YES	yes		yes	36.5
post	SURVIVED	1400	29	YES	yes		yes	36
post	SURVIVED	2200	29	NO	yes	referred	yes
post	SURVIVED	1200	29	YES	yes	referred	yes	36.8
post	SURVIVED	2500	29	NO	yes	referred	yes
post	SURVIVED	1300	29	YES	yes	inborn	yes	36.8
post	SURVIVED	1400	29	YES	yes	inborn	yes	36.6
post	SURVIVED	2200	29	YES	yes	inborn	yes	37.3
post	SURVIVED	1030	29	YES	yes	inborn	yes
post	SURVIVED	1600	29	YES	yes	referred	yes
post	SURVIVED	1100	29	YES	yes	inborn	yes
post	SURVIVED	1300	29	YES	yes	inborn	yes
post	SURVIVED	1550	29	YES	yes	referred	yes	37.4
post	SURVIVED	2100	29	YES	yes	inborn	yes
post	SURVIVED	1900	29	YES	yes	referred	yes
post	SURVIVED	1000	29	YES	yes	referred	yes	36.5
post	SURVIVED	1300	29	YES	yes	referred	yes	36.8
post	SURVIVED	2200	29	YES	yes	inborn	yes	36.6
post	SURVIVED	1700	29	YES	yes	referred	yes	36.8
post	SURVIVED	1900	29	YES	yes	inborn	yes	36.4
post	SURVIVED	2100	29	YES	yes	inborn	yes	37
post	SURVIVED	1880	29	YES	yes	referred	yes	37.1
post	SURVIVED	1800	29	YES	yes	inborn	yes
post	SURVIVED	1650	29	NO	yes	referred	yes
post	SURVIVED	900	29	YES	yes	inborn	yes
post	SURVIVED	1200	29	YES	yes	inborn	yes
post	SURVIVED	2400	29	YES	yes	inborn	yes
post	SURVIVED	1000	29	YES	yes	referred	yes
post	SURVIVED	1500	29	YES	yes	referred	yes
post	SURVIVED	990	29	YES	yes	inborn	yes
post	SURVIVED	1000	29	YES	yes	inborn	yes	36.8
post	SURVIVED	1500	29	YES	yes	inborn	yes	36
post	SURVIVED	1700	29	YES	yes	inborn	yes	36
post	SURVIVED	1900	29	YES	yes	inborn	yes	35.9
post	SURVIVED	1400	29	YES	yes	inborn	yes	36
post	SURVIVED	1150	29	YES	yes	inborn	yes	35.8
post	SURVIVED	1600	29	YES	yes	inborn	yes	36.2
post	SURVIVED	1700	29	YES	yes	inborn	yes	36
post	SURVIVED	1400	29	YES	yes	inborn	yes	36.6
post	SURVIVED	1850	29	YES	yes	inborn	yes	36.2
post	SURVIVED	1500	29	YES	yes	inborn	yes	36.3
post	SURVIVED	1600	29	YES	yes	inborn	yes	36.8
post	SURVIVED	1300	29	YES	yes	inborn	yes	36
post	SURVIVED	1650	29	YES	yes	inborn	yes	36
post	SURVIVED	1700	29	YES	yes	inborn	yes	36
post	SURVIVED	1300	29	YES	yes	inborn	yes	37
post	SURVIVED	1950	29	YES	yes	referred	yes	36
pre	DEATH	1800	29	NO	yes	referred	yes
pre	DEATH	1600	29	YES	yes	inborn	yes	35
pre	DEATH	1300	29	NO	no	referred	yes
post	DEATH	900	29	NO	yes		yes	37.1
post	DEATH	1400	29	YES	yes	inborn	yes	36.6
post	DEATH	1200	29	NO	yes	referred	yes	36.3
post	DEATH	1600	29	YES	yes	inborn	yes	36.1
post	DEATH	1380	29	YES	yes	inborn	yes	36.8
post	DEATH	1200	29	YES	yes	inborn	yes	37
post	DEATH	1400	29	YES	yes	inborn	yes	36.9
post	DEATH	1100	29	YES	no	referred	yes
post	DEATH	1100	29	YES	yes	referred	yes	36.9
post	DEATH	1200	29	NO	no	referred	yes
post	DEATH	900	29	YES	yes	referred	yes
post	DEATH	1050	29	YES	yes	referred	yes
post	DEATH	1850	29	YES	yes	inborn	yes	35.8
post	DEATH	1900	29	YES	yes	inborn	yes	36.7
post	DEATH	1000	29	YES	yes	inborn	yes
pre	SURVIVED	1600	29	NO	no	referred	no
pre	SURVIVED	1400	29	NO	no	inborn	no
pre	SURVIVED	2200	29	NO	no	inborn	no
pre	SURVIVED	1500	29	NO	no	referred	no
pre	SURVIVED	1600	29	YES	no	inborn	no
pre	SURVIVED	1800	29	YES	no	inborn	no
pre	SURVIVED	1600	29	NO	no	inborn	no
pre	SURVIVED	1700	29	YES	yes	inborn	no
pre	SURVIVED	1500	29	NO	no	inborn	no
pre	SURVIVED	1800	29	NO	no	inborn	no
pre	SURVIVED	1700	29	NO	no	inborn	no
pre	SURVIVED	1300	29	NO	no	inborn	no
pre	SURVIVED	1300	29	NO	no	referred	no
pre	SURVIVED	1650	29	NO	no	referred	no
pre	SURVIVED	1500	29	NO	no	referred	no
pre	SURVIVED	1300	29	NO	no	referred	no
pre	SURVIVED	1600	29	NO	no	referred	no
pre	SURVIVED	1500	29	NO	no	referred	no
pre	SURVIVED	1800	29	NO	no	inborn	no
pre	SURVIVED	1700	29	NO	no	inborn	no
pre	SURVIVED	1600	29	NO	yes	inborn	no	35.9
pre	SURVIVED	1700	29	YES	no	inborn	no
pre	SURVIVED	1900	29	NO	no	inborn	no	36.2
pre	SURVIVED	1800	29	NO	yes	inborn	no	36.2
pre	SURVIVED	1300	29	YES	yes	inborn	no	36.6
pre	SURVIVED	1600	29	YES	yes	inborn	no	36.2
pre	SURVIVED	1600	29	NO	no	inborn	no
pre	SURVIVED	1500	29	NO	no	inborn	no	36.2
pre	SURVIVED	1400	29	YES	yes	inborn	no	36.2
pre	SURVIVED	1800	29	YES	no	inborn	no	36
pre	SURVIVED	1620	29	NO	no		no
pre	SURVIVED	1670	29	NO	no	inborn	no
post	SURVIVED	2000	29	NO	no	inborn	no
post	SURVIVED	1750	29	NO	yes	inborn	no	36.5
post	SURVIVED	1300	29	NO	yes	referred	no	35.9
post	SURVIVED	1720	29	NO	yes	referred	no	35.2
post	SURVIVED	2000	29	NO	yes	referred	no	36.3
post	SURVIVED	2100	29	NO	yes	referred	no	36
post	SURVIVED	1300	29	NO	yes	referred	no	36
post	SURVIVED	1720	29	YES	yes	inborn	no	36.5
post	SURVIVED	1600	29	YES	yes	inborn	no	37.2
post	SURVIVED	1800	29	NO	no	referred	no	36.4
post	SURVIVED	1360	29	NO	no	referred	no	36.4
post	SURVIVED	1200	29	NO	no	referred	no	36.4
post	SURVIVED	1000	29	NO	no	referred	no
post	SURVIVED	1400	29	NO	no	referred	no	36.4
post	SURVIVED	3100	29	NO	no	referred	no
post	SURVIVED	3500	29	NO	no	referred	no
post	SURVIVED	1650	29	NO	no	inborn	no
post	SURVIVED	1300	29	NO	no	referred	no	36.3
post	SURVIVED	1900	29	YES	yes	inborn	no	36.5
post	SURVIVED	1050	29	YES	yes	inborn	no	36.3
post	SURVIVED	1600	29	YES	yes	inborn	no	36.2
post	SURVIVED	1200	29	YES	yes	inborn	no	37
post	SURVIVED	1400	29	YES	yes	inborn	no	36.4
post	SURVIVED	1900	29	YES	yes		no	36.8
post	SURVIVED	1700	29	YES	yes		no	36.3
post	SURVIVED	1500	29	NO	no		no	34.9
post	SURVIVED	1350	29	YES	yes		no	36
post	SURVIVED	1200	29	NO	no		no	36.1
post	SURVIVED	1700	29	NO	yes		no	35.5
post	SURVIVED	1500	29	NO	no	inborn	no	36
post	SURVIVED	1800	29	NO	no	referred	no	36.4
post	SURVIVED	1950	29	YES	no	inborn	no	36.2
post	SURVIVED	1700	29	YES	yes	referred	no	36
post	SURVIVED	1160	29	NO	no	inborn	no
post	SURVIVED	2260	29	NO	no		no
post	SURVIVED	1170	29	NO	yes		no	36.4
post	SURVIVED	2050	29	YES	yes	referred	no	37.3
post	SURVIVED	600	29	NO	yes	referred	no	36.7
post	SURVIVED	2050	29	NO	yes	referred	no	36.5
post	SURVIVED	1200	29	YES	yes	referred	no	36.7
post	SURVIVED	1050	29	YES	yes	referred	no	36.8
post	SURVIVED	1600	29	YES	yes	referred	no	35.9
post	SURVIVED	1900	29	YES	yes	referred	no	36.8
post	SURVIVED	2000	29	YES	yes	referred	no	36.8
post	SURVIVED	1300	29	YES	yes	referred	no	36.6
post	SURVIVED	1400	29	YES	yes	referred	no	37.2
post	SURVIVED	900	29	YES	yes	referred	no
post	SURVIVED	900	29	YES	yes	referred	no	36.5
post	SURVIVED	2000	29	YES	yes	inborn	no	37.1
post	SURVIVED	1600	29	NO	yes	referred	no
post	SURVIVED	1100	29	YES	yes	inborn	no	37.3
post	SURVIVED	1100	29	YES	yes	inborn	no	36
post	SURVIVED	1700	29	NO	yes	referred	no
post	SURVIVED	2200	29	YES	yes	inborn	no	37.1
post	SURVIVED	1200	29	NO	no	inborn	no
post	SURVIVED	1700	29	NO	no	inborn	no	35.8
post	SURVIVED	1800	29	YES	yes	inborn	no	37
post	SURVIVED	1200	29	YES	yes	inborn	no	36.3
post	SURVIVED	1300	29	YES	yes	inborn	no	37
post	SURVIVED	1600	29	YES	yes	inborn	no	36.7
post	SURVIVED	1100	29	YES	yes	inborn	no	36.6
post	SURVIVED	1200	29	YES	yes	inborn	no	36.7
post	SURVIVED	1700	29	YES	no	inborn	no	37
post	SURVIVED	1500	29	YES	yes	inborn	no	36.2
post	SURVIVED	1600	29	YES	yes	inborn	no	36
post	SURVIVED	1600	29	YES	yes	inborn	no	35.8
post	SURVIVED	1600	29	YES	yes	inborn	no	36
post	SURVIVED	1700	29	NO	no	inborn	no	36.1
post	SURVIVED	1720	29	NO	no	inborn	no	36
pre	DEATH	1700	29	NO	no	referred	no
pre	DEATH	1100	29	NO	no	inborn	no
pre	DEATH	1450	29	NO	no	referred	no
pre	DEATH	1120	29	NO	no	inborn	no
pre	DEATH	1400	29	NO	no	referred	no
pre	DEATH	1700	29	NO	no	referred	no
pre	DEATH	1200	29	NO	no	referred	no
pre	DEATH	1440	29	NO	no	inborn	no
pre	DEATH	1510	29	NO	no	inborn	no
post	DEATH	900	29	NO	yes	referred	no	35
post	DEATH	1450	29	YES	yes	inborn	no	36
post	DEATH	1350	29	YES	yes	referred	no	36.1
post	DEATH	1300	29	NO	yes	referred	no	35.7
post	DEATH	1420	29	NO	yes	referred	no	36.2
post	DEATH	1100	29	NO	no	referred	no	35.8
post	DEATH	1400	29	NO	no	referred	no	35.8
post	DEATH	1000	29	YES	yes	referred	no	36.4
post	DEATH	1200	29	NO	no	referred	no	37.1
post	DEATH	1800	29	NO	no	referred	no	35.6
post	DEATH	1100	29	YES	yes		no	36
post	DEATH	1100	29	YES	no		no	36.5
post	DEATH	1050	29	YES	yes		no	36.3
post	DEATH	1300	29	YES	yes		no	36.4
post	DEATH	1200	29	NO	yes		no	36.8
post	DEATH	1910	29	NO	yes		no	35.8
post	DEATH	980	29	NO	yes		no	36.3
post	DEATH	700	29	YES	yes	inborn	no	36.5
pre	SURVIVED	1600	30	YES	no	referred	yes
pre	SURVIVED	1500	30	YES	yes	inborn	yes
pre	SURVIVED	1650	30	YES	yes	inborn	yes	36.8
pre	SURVIVED	1600	30	YES	yes	inborn	yes	36
pre	SURVIVED	1200	30	YES	yes	inborn	yes	35
pre	SURVIVED	1500	30	YES	yes	inborn	yes	36.4
pre	SURVIVED	1850	30	YES	yes	referred	yes	35.5
pre	SURVIVED	1900	30	YES	yes	inborn	yes
pre	SURVIVED	1700	30	YES	yes	referred	yes	36
pre	SURVIVED	1800	30	YES	no	inborn	yes
pre	SURVIVED	1800	30	NO	no	referred	yes
pre	SURVIVED	1100	30	NO	no	referred	yes
pre	SURVIVED	1300	30	NO	no	referred	yes
pre	SURVIVED	1200	30	NO	no	referred	yes
pre	SURVIVED	1900	30	YES	no	referred	yes
pre	SURVIVED	1200	30	NO	no	referred	yes
pre	SURVIVED	1000	30	NO	no	inborn	yes
pre	SURVIVED	1800	30	NO	no	referred	yes
pre	SURVIVED	1200	30	NO	no	referred	yes
pre	SURVIVED	1500	30	NO	no	referred	yes
pre	SURVIVED	1800	30	NO	no	referred	yes
pre	SURVIVED	1150	30	YES	yes	inborn	yes	35.5
pre	SURVIVED	1200	30	YES	yes	inborn	yes	35.6
pre	SURVIVED	2000	30	YES	yes	referred	yes	36
pre	SURVIVED	1800	30	YES	yes	inborn	yes	36.9
pre	SURVIVED	1550	30	YES	yes	inborn	yes	36.2
pre	SURVIVED	1700	30	NO	yes	inborn	yes	36
pre	SURVIVED	1400	30	YES	no	inborn	yes	35.1
pre	SURVIVED	1300	30	NO	no	inborn	yes	36.8
pre	SURVIVED	1050	30	NO	yes	inborn	yes	33
post	SURVIVED	1300	30	NO	yes		yes	37.2
post	SURVIVED	1000	30	YES	yes		yes	36.5
post	SURVIVED	900	30	YES	yes	referred	yes	37.3
post	SURVIVED	1000	30	NO	yes		yes	36.6
post	SURVIVED	1350	30	NO	yes		yes	35.9
post	SURVIVED	1800	30	NO	yes	referred	yes	36.2
post	SURVIVED	1300	30	YES	yes	referred	yes	37.2
post	SURVIVED	1000	30	YES	yes	referred	yes	36
post	SURVIVED	1000	30	YES	yes	referred	yes	35.6
post	SURVIVED	1000	30	YES	yes	referred	yes	36.2
post	SURVIVED	1300	30	YES	yes	referred	yes	37.2
post	SURVIVED	1200	30	YES	yes	inborn	yes	36.9
post	SURVIVED	1500	30	NO	yes	referred	yes	36
post	SURVIVED	1600	30	YES	yes	inborn	yes	36.2
post	SURVIVED	1700	30	NO	yes	referred	yes	35.8
post	SURVIVED	2400	30	YES	yes	referred	yes	36
post	SURVIVED	1000	30	YES	yes	referred	yes	36
post	SURVIVED	2150	30	NO	yes	inborn	yes
post	SURVIVED	1450	30	YES	yes	referred	yes	36.6
post	SURVIVED	1350	30	YES	yes	referred	yes	37.1
post	SURVIVED	1300	30	YES	yes	inborn	yes	37.2
post	SURVIVED	2230	30	NO	yes	referred	yes	35.9
post	SURVIVED	1440	30	YES	yes	inborn	yes	37.3
post	SURVIVED	2000	30	YES	yes	referred	yes	36.7
post	SURVIVED	2100	30	YES	yes	referred	yes	36.9
post	SURVIVED	1400	30	NO	yes	referred	yes	36
post	SURVIVED	1300	30	NO	yes	referred	yes	36.2
post	SURVIVED	1900	30	YES	yes	inborn	yes	36.9
post	SURVIVED	1300	30	NO	yes	referred	yes	35.7
post	SURVIVED	1650	30	YES	yes	inborn	yes	35.9
post	SURVIVED	1700	30	YES	yes		yes	37
post	SURVIVED	1800	30	YES	yes	inborn	yes	36.6
post	SURVIVED	2000	30	YES	yes	referred	yes	36.5
post	SURVIVED	1500	30	YES	yes	referred	yes	37
post	SURVIVED	1500	30	YES	yes	referred	yes	37
post	SURVIVED	1700	30	YES	yes	inborn	yes	36.9
post	SURVIVED	1500	30	YES	yes	inborn	yes	37
post	SURVIVED	1500	30	YES	yes	referred	yes	36.2
post	SURVIVED	2000	30	YES	yes	referred	yes	37.3
post	SURVIVED	2130	30	YES	yes	referred	yes	36.6
post	SURVIVED	1200	30	YES	yes	referred	yes	36.4
post	SURVIVED	1800	30	NO	yes	referred	yes	36.3
post	SURVIVED	1600	30	YES	yes	inborn	yes	37.2
post	SURVIVED	1700	30	YES	yes	inborn	yes	36.4
post	SURVIVED	1740	30	NO	yes	referred	yes	36.1
post	SURVIVED	1500	30	YES	yes	referred	yes	36.2
post	SURVIVED	1700	30	YES	yes	inborn	yes	36.6
post	SURVIVED	1600	30	YES	yes	inborn	yes	36.8
post	SURVIVED	1400	30	YES	yes	referred	yes	36.1
post	SURVIVED	1750	30	YES	yes	referred	yes	37.1
post	SURVIVED	2300	30	YES	yes	referred	yes	36.3
post	SURVIVED	1300	30	YES	yes	referred	yes	36
post	SURVIVED	1250	30	YES	yes	referred	yes	36.6
post	SURVIVED	1300	30	YES	yes	referred	yes	36.6
post	SURVIVED	1230	30	YES	yes	referred	yes	36.6
post	SURVIVED	1840	30	YES	yes	referred	yes	36.6
post	SURVIVED	2000	30	NO	no	referred	yes
post	SURVIVED	1350	30	YES	yes	referred	yes	36.7
post	SURVIVED	1180	30	YES	yes	inborn	yes	37.1
post	SURVIVED	1800	30	YES	yes	inborn	yes	37
post	SURVIVED	1100	30	NO	no	referred	yes	36.1
post	SURVIVED	1600	30	NO	no	referred	yes	36
post	SURVIVED	1600	30	NO	no	referred	yes	36.1
post	SURVIVED	2060	30	NO	no	referred	yes	36
post	SURVIVED	2200	30	YES	yes	referred	yes	36.5
post	SURVIVED	1300	30	YES	yes	inborn	yes	37.1
post	SURVIVED	2050	30	YES	yes	inborn	yes	37.1
post	SURVIVED	2100	30	YES	yes	inborn	yes	37.1
post	SURVIVED	1600	30	YES	yes	inborn	yes	37
post	SURVIVED	2300	30	YES	yes	inborn	yes	36.9
post	SURVIVED	1900	30	YES	yes	referred	yes	36.6
post	SURVIVED	1900	30	NO	no	referred	yes	36.1
post	SURVIVED	1800	30	YES	yes	inborn	yes	36.9
post	SURVIVED	2050	30	NO	no	referred	yes	36
post	SURVIVED	2200	30	NO	no	referred	yes	35.9
post	SURVIVED	2000	30	NO	no	referred	yes	36.4
post	SURVIVED	1400	30	YES	yes	referred	yes	36.5
post	SURVIVED	1700	30	NO	no	referred	yes	35.9
post	SURVIVED	1400	30	NO	no	referred	yes	36.1
post	SURVIVED	1600	30	YES	yes	inborn	yes	37.6
post	SURVIVED	2200	30	NO	no	referred	yes	36.1
post	SURVIVED	1800	30	NO	no	referred	yes	35.8
post	SURVIVED	1500	30	YES	yes	referred	yes	36.6
post	SURVIVED	1300	30	YES	yes	inborn	yes	36.8
post	SURVIVED	1300	30	YES	yes	inborn	yes	37.2
post	SURVIVED	1400	30	YES	yes	referred	yes	36.8
post	SURVIVED	2000	30	YES	yes	inborn	yes	36.9
post	SURVIVED	1400	30	YES	yes	inborn	yes	36.8
post	SURVIVED	900	30	YES	yes	referred	yes	36.6
post	SURVIVED	1400	30	YES	yes	inborn	yes	36.9
post	SURVIVED	2200	30	YES	yes	inborn	yes	36.8
post	SURVIVED	1300	30	YES	yes	inborn	yes	37.2
post	SURVIVED	2100	30	YES	yes	inborn	yes	36.9
post	SURVIVED	1400	30	YES	yes	referred	yes	36.7
post	SURVIVED	1400	30	YES	yes	inborn	yes	37.1
post	SURVIVED	1500	30	YES	yes	inborn	yes	36.9
post	SURVIVED	1600	30	YES	yes	inborn	yes	36.9
post	SURVIVED	1500	30	YES	yes	inborn	yes	36.9
post	SURVIVED	1200	30	YES	yes	referred	yes	36.7
post	SURVIVED	2100	30	YES	yes	inborn	yes	36.9
post	SURVIVED	1900	30	YES	yes	referred	yes	36.5
post	SURVIVED	1400	30	YES	yes	referred	yes	36.7
post	SURVIVED	1500	30	YES	yes	referred	yes	36.6
post	SURVIVED	1200	30	YES	yes	inborn	yes	37.2
post	SURVIVED	1950	30	YES	yes	inborn	yes	35.9
post	SURVIVED	2000	30	NO	yes	referred	yes	35.8
post	SURVIVED	1850	30	NO	yes	inborn	yes	35
post	SURVIVED	1600	30	YES	yes	inborn	yes	35.9
post	SURVIVED	2400	30	YES	yes	referred	yes	36.2
post	SURVIVED	1550	30	YES	yes	inborn	yes	36
post	SURVIVED	1100	30	YES	yes	inborn	yes	36.1
post	SURVIVED	1500	30	YES	yes	inborn	yes	36
post	SURVIVED	1300	30	YES	yes	referred	yes	35.8
post	SURVIVED	1450	30	YES	yes	inborn	yes	35.9
post	SURVIVED	2100	30	NO	yes	referred	yes	35.5
post	SURVIVED	1500	30	NO	yes	referred	yes	35.4
post	SURVIVED	1200	30	YES	yes	inborn	yes	36
post	SURVIVED	1900	30	NO	yes	inborn	yes	35.5
post	SURVIVED	2000	30	NO	yes	inborn	yes	35.9
post	SURVIVED	1850	30	YES	yes	referred	yes	36.4
post	SURVIVED	1800	30	YES	no	inborn	yes	36.4
post	SURVIVED	1300	30	YES	yes	inborn	yes	36.8
post	SURVIVED	1700	30	YES	yes	inborn	yes	36.4
post	SURVIVED	1950	30	YES	yes		yes	36.4
post	SURVIVED	1950	30	YES	yes		yes	36.1
post	SURVIVED	2350	30	NO	no	inborn	yes	35.9
post	SURVIVED	1800	30	YES	yes		yes	36.5
post	SURVIVED		30	NO	yes		yes	34
post	SURVIVED	1370	30	NO	yes		yes	36.4
post	SURVIVED	1700	30	YES	yes	inborn	yes	36.8
post	SURVIVED	900	30	YES	yes	inborn	yes
post	SURVIVED	750	30	YES	yes	referred	yes
post	SURVIVED	1400	30	YES	no	inborn	yes
post	SURVIVED	1700	30	YES	yes	inborn	yes	37.2
post	SURVIVED	1200	30	YES	yes	referred	yes
post	SURVIVED	1920	30	YES	yes	inborn	yes
post	SURVIVED	1900	30	YES	yes	inborn	yes	36.6
post	SURVIVED	1250	30	YES	yes	inborn	yes
post	SURVIVED	1650	30	YES	yes	inborn	yes
post	SURVIVED	1300	30	YES	yes	inborn	yes	36.8
post	SURVIVED	1200	30	YES	yes	inborn	yes
post	SURVIVED	1800	30	YES	yes	inborn	yes
post	SURVIVED	1400	30	YES	yes	inborn	yes
post	SURVIVED	1500	30	NO	yes	referred	yes	36.9
post	SURVIVED	1800	30	YES	yes	inborn	yes	36.6
post	SURVIVED	2400	30	YES	yes	inborn	yes
post	SURVIVED	2000	30	YES	yes	inborn	yes	36.8
post	SURVIVED	1450	30	YES	yes	referred	yes
post	SURVIVED	1500	30	YES	yes	inborn	yes
post	SURVIVED	1800	30	YES	yes	inborn	yes	36.6
post	SURVIVED	1250	30	YES	yes	inborn	yes	36.5
post	SURVIVED	2200	30	YES	yes	referred	yes	36.8
post	SURVIVED	1600	30	YES	yes	inborn	yes
post	SURVIVED	1800	30	YES	yes	inborn	yes
post	SURVIVED	2000	30	YES	yes	referred	yes	37
post	SURVIVED	1200	30	YES	yes	inborn	yes
post	SURVIVED	1800	30	YES	yes	referred	yes	36.6
post	SURVIVED	1900	30	NO	yes	referred	yes
post	SURVIVED	1100	30	YES	yes	referred	yes	36.4
post	SURVIVED	1100	30	YES	yes	referred	yes	36.6
post	SURVIVED	1400	30	YES	yes	inborn	yes
post	SURVIVED	1700	30	YES	yes	referred	yes	36.2
post	SURVIVED	1400	30	YES	yes	referred	yes	36.6
post	SURVIVED	1800	30	YES	yes	inborn	yes
post	SURVIVED	1700	30	YES	yes	inborn	yes
post	SURVIVED	1500	30	YES	yes	inborn	yes	37.3
post	SURVIVED	800	30	NO	yes	referred	yes	36.9
post	SURVIVED	2000	30	YES	yes	inborn	yes
post	SURVIVED	1400	30	YES	yes	inborn	yes	36.6
post	SURVIVED	1650	30	YES	yes	inborn	yes	37.3
post	SURVIVED	1400	30	YES	yes	referred	yes
post	SURVIVED	1400	30	YES	yes	referred	yes
post	SURVIVED	1300	30	YES	yes	referred	yes
post	SURVIVED	2100	30	YES	yes	referred	yes
post	SURVIVED	1450	30	YES	yes	inborn	yes
post	SURVIVED	1700	30	YES	yes	inborn	yes
post	SURVIVED	1400	30	YES	yes	inborn	yes
post	SURVIVED	800	30	YES	yes	inborn	yes	36.5
post	SURVIVED	900	30	YES	yes	inborn	yes
post	SURVIVED	1600	30	YES	yes	inborn	yes
post	SURVIVED	1400	30	NO	yes	referred	yes
post	SURVIVED	2400	30	YES	yes	referred	yes
post	SURVIVED	1800	30	YES	yes	inborn	yes
post	SURVIVED	2000	30	YES	yes	inborn	yes
post	SURVIVED	1950	30	YES	yes	referred	yes
post	SURVIVED	1800	30	YES	yes	referred	yes
post	SURVIVED	1200	30	YES	yes	inborn	yes
post	SURVIVED	1800	30	YES	yes	referred	yes
post	SURVIVED	2050	30	YES	yes	referred	yes
post	SURVIVED	1400	30	YES	yes	inborn	yes
post	SURVIVED	1400	30	YES	yes	inborn	yes	35.9
post	SURVIVED	1700	30	YES	yes	inborn	yes	35.8
post	SURVIVED	2100	30	NO	yes	referred	yes	35.9
post	SURVIVED	1400	30	YES	yes	inborn	yes	36
post	SURVIVED	1400	30	YES	yes	referred	yes	35.8
post	SURVIVED	1900	30	NO	yes	referred	yes	36
post	SURVIVED	1800	30	YES	yes	inborn	yes	35.5
post	SURVIVED	1500	30	YES	yes	inborn	yes	36
post	SURVIVED	1650	30	YES	yes	inborn	yes	36.2
post	SURVIVED	1300	30	YES	no	inborn	yes	36
post	SURVIVED	1200	30	YES	yes	inborn	yes	37
post	SURVIVED	1800	30	YES	yes	inborn	yes	36
post	SURVIVED	1900	30	YES	yes	inborn	yes	36.8
post	SURVIVED	3400	30	YES	yes	inborn	yes	36
post	SURVIVED	3300	30	YES	yes	inborn	yes	36.2
post	SURVIVED	1900	30	YES	yes	inborn	yes	36
post	SURVIVED	1900	30	YES	yes	inborn	yes	36
post	SURVIVED	1700	30	YES	yes	inborn	yes	36
post	SURVIVED	1900	30	YES	yes	inborn	yes	35.4
post	SURVIVED	1900	30	YES	yes	inborn	yes	37
post	SURVIVED	1300	30	YES	yes	inborn	yes	36
pre	DEATH	1100	30	YES	yes	referred	yes
pre	DEATH	1700	30	YES	no	inborn	yes
pre	DEATH	1000	30	NO	no	inborn	yes
post	DEATH	1000	30	NO	no	referred	yes	37.1
post	DEATH	1650	30	NO	yes	referred	yes	36.2
post	DEATH	1000	30	YES	yes		yes	36.2
post	DEATH	1000	30	YES	yes	referred	yes	36.9
post	DEATH	1000	30	YES	yes		yes	36.2
post	DEATH	1000	30	NO	no		yes	35.9
post	DEATH	1000	30	NO	no	referred	yes	37.1
post	DEATH	1500	30	NO	yes	inborn	yes	35.7
post	DEATH	1200	30	YES	yes	referred	yes	35
post	DEATH	1300	30	YES	yes	inborn	yes	36
post	DEATH	1370	30	YES	yes	inborn	yes	37.1
post	DEATH	1600	30	NO	yes	referred	yes	35.9
post	DEATH	1100	30	NO	yes		yes	35.9
post	DEATH	1230	30	YES	yes	inborn	yes	36.8
post	DEATH	1300	30	YES	yes		yes	36.8
post	DEATH	2300	30	YES	yes	inborn	yes	37.9
post	DEATH	1000	30	NO	yes	referred	yes	36
post	DEATH	1000	30	YES	yes	referred	yes	36.7
post	DEATH	1750	30	YES	yes	referred	yes	36.4
post	DEATH	1300	30	YES	yes	referred	yes	36
post	DEATH	700	30	NO	no	referred	yes	35.8
post	DEATH	1300	30	NO	no	referred	yes	36
post	DEATH	1300	30	YES	yes	referred	yes	36.5
post	DEATH	1700	30	YES	yes	referred	yes	36.6
post	DEATH	1950	30	YES	yes	referred	yes	37.3
post	DEATH	1100	30	NO	no	referred	yes	36.1
post	DEATH	1400	30	NO	no	referred	yes	36
post	DEATH	1050	30	YES	yes	inborn	yes	36.8
post	DEATH	1800	30	YES	yes	referred	yes	36.6
post	DEATH	1400	30	YES	yes	referred	yes	36.7
post	DEATH	1400	30	YES	yes	referred	yes	36.7
post	DEATH	1800	30	YES	yes	referred	yes	36.8
post	DEATH	1800	30	YES	yes	referred	yes	36.8
post	DEATH	1000	30	NO	no	inborn	yes	36.3
post	DEATH	1100	30	NO	no	referred	yes	36
post	DEATH	1900	30	YES	yes	referred	yes	35.9
post	DEATH	1600	30	NO	yes	referred	yes	35.5
post	DEATH	2000	30	YES	yes	referred	yes	35.8
post	DEATH	1450	30	NO	no	referred	yes	35.8
post	DEATH	1800	30	YES	yes		yes	36
post	DEATH	1800	30	YES	yes		yes	36.5
post	DEATH	1700	30	YES	yes	inborn	yes	33
post	DEATH	1000	30	NO	no	referred	yes	35.8
post	DEATH	1700	30	YES	no	referred	yes	37
post	DEATH	1500	30	YES	no	inborn	yes	37.1
post	DEATH	1000	30	YES	yes	referred	yes
post	DEATH	800	30	YES	yes	referred	yes	36.4
post	DEATH	1270	30	YES	yes	referred	yes
post	DEATH	1300	30	YES	yes	inborn	yes
post	DEATH	800	30	YES	no	inborn	yes
post	DEATH	1150	30	YES	yes	inborn	yes	35.9
post	DEATH	900	30	NO	yes	referred	yes	35.5
post	DEATH	1300	30	YES	yes	inborn	yes	35.9
pre	SURVIVED	1400	30	NO	no	referred	no
pre	SURVIVED	1350	30	NO	no	referred	no
pre	SURVIVED	3200	30	NO	no	referred	no
pre	SURVIVED	2300	30	NO	no	inborn	no
pre	SURVIVED	1400	30	NO	no	referred	no
pre	SURVIVED	2900	30	NO	no	inborn	no
pre	SURVIVED	1300	30	NO	no	inborn	no
pre	SURVIVED	1800	30	NO	no	inborn	no
pre	SURVIVED	1800	30	NO	no	inborn	no
pre	SURVIVED	1500	30	YES	no	inborn	no
pre	SURVIVED	1600	30	NO	no	inborn	no
pre	SURVIVED	1800	30	NO	no	inborn	no
pre	SURVIVED	1900	30	NO	no	inborn	no
pre	SURVIVED	1800	30	NO	no	inborn	no
pre	SURVIVED	1300	30	NO	no	inborn	no
pre	SURVIVED	1800	30	NO	yes	inborn	no
pre	SURVIVED	1800	30	NO	no	inborn	no
pre	SURVIVED	1250	30	NO	no	inborn	no
pre	SURVIVED	1000	30	NO	no	inborn	no
pre	SURVIVED	1800	30	NO	no	referred	no
pre	SURVIVED	2400	30	YES	yes	referred	no
pre	SURVIVED	1200	30	NO	no	inborn	no
pre	SURVIVED	1900	30	YES	no	inborn	no
pre	SURVIVED	1950	30	YES	no	referred	no
pre	SURVIVED	1900	30	YES	no	inborn	no
pre	SURVIVED	1800	30	NO	no	inborn	no
pre	SURVIVED	1450	30	NO	no	referred	no
pre	SURVIVED	1300	30	NO	no	referred	no
pre	SURVIVED	1600	30	NO	no	referred	no
pre	SURVIVED	1500	30	NO	no	referred	no
pre	SURVIVED	1900	30	YES	no	inborn	no
pre	SURVIVED	1900	30	YES	no	inborn	no
pre	SURVIVED	1300	30	NO	no	referred	no
pre	SURVIVED	1700	30	NO	no	referred	no
pre	SURVIVED	1750	30	YES	no	referred	no
pre	SURVIVED	2000	30	NO	no	inborn	no
pre	SURVIVED	1600	30	YES	no	inborn	no	36.2
pre	SURVIVED	1450	30	YES	no	inborn	no
pre	SURVIVED	1800	30	YES	yes	inborn	no	36.2
pre	SURVIVED	1400	30	NO	no	referred	no	36.8
pre	SURVIVED	1400	30	NO	no	inborn	no	36.2
pre	SURVIVED	1500	30	NO	no	inborn	no
pre	SURVIVED	1200	30	NO	no	inborn	no	36.2
pre	SURVIVED	1300	30	NO	no	inborn	no	36
pre	SURVIVED	1600	30	NO	no	inborn	no	36
pre	SURVIVED	1570	30	YES	yes	inborn	no	36.7
pre	SURVIVED	1200	30	YES	yes	inborn	no	36.2
pre	SURVIVED	1300	30	NO	yes	inborn	no	36
pre	SURVIVED	1300	30	NO	no	inborn	no
pre	SURVIVED	1700	30	YES	yes	inborn	no	36.3
pre	SURVIVED	1300	30	NO	no	inborn	no	35.8
pre	SURVIVED	1600	30	NO	no	inborn	no	36.2
pre	SURVIVED	1850	30	NO	no	inborn	no
pre	SURVIVED	1950	30	NO	no	inborn	no
pre	SURVIVED	1850	30	NO	no	inborn	no
pre	SURVIVED	1900	30	NO	no	inborn	no
pre	SURVIVED	1950	30	NO	no	inborn	no
pre	SURVIVED	1600	30	NO	no	inborn	no
pre	SURVIVED	3000	30	NO	no	inborn	no	36.6
pre	SURVIVED	1600	30	YES	yes	inborn	no	36.2
pre	SURVIVED	1750	30	NO	no	inborn	no	36.2
pre	SURVIVED	1800	30	YES	no	inborn	no	36.2
pre	SURVIVED	1800	30	YES	yes	inborn	no	36.2
pre	SURVIVED	1400	30	NO	no	inborn	no	36.2
pre	SURVIVED	1620	30	NO	no	inborn	no
pre	SURVIVED	1630	30	NO	yes	inborn	no
pre	SURVIVED	2400	30	NO	no	inborn	no
post	SURVIVED	1800	30	NO	no	referred	no
post	SURVIVED	2200	30	NO	no	inborn	no
post	SURVIVED	2200	30	NO	no	inborn	no
post	SURVIVED	2200	30	YES	yes	referred	no	36.6
post	SURVIVED	1500	30	NO	yes	referred	no	36.4
post	SURVIVED	1900	30	NO	yes	inborn	no	36.8
post	SURVIVED	1400	30	NO	yes	inborn	no	35.9
post	SURVIVED	2150	30	YES	yes	referred	no	36.3
post	SURVIVED	1870	30	NO	yes	referred	no	36.3
post	SURVIVED	1630	30	NO	yes	referred	no	35.9
post	SURVIVED	1350	30	NO	yes	referred	no	36.2
post	SURVIVED	2350	30	YES	yes	referred	no	36.8
post	SURVIVED	1500	30	YES	yes	referred	no	36
post	SURVIVED	1700	30	NO	yes	referred	no	36.1
post	SURVIVED	1660	30	YES	yes	inborn	no	36.2
post	SURVIVED	1400	30	NO	yes	referred	no	36
post	SURVIVED	1820	30	NO	yes	referred	no	36.3
post	SURVIVED	1900	30	NO	yes	referred	no	36.4
post	SURVIVED	1700	30	NO	yes	inborn	no	36.2
post	SURVIVED	1700	30	NO	yes	inborn	no	36.5
post	SURVIVED	1450	30	YES	yes	referred	no	36.6
post	SURVIVED	1900	30	YES	yes	referred	no	36.1
post	SURVIVED	2100	30	NO	no	referred	no	35.8
post	SURVIVED	2050	30	NO	no	referred	no	36.3
post	SURVIVED	2050	30	NO	no	referred	no	36.3
post	SURVIVED	1500	30	NO	no	inborn	no	36.3
post	SURVIVED	1700	30	NO	no	referred	no	36.4
post	SURVIVED	1200	30	NO	no	referred	no	36.4
post	SURVIVED	1900	30	NO	no	inborn	no
post	SURVIVED	1300	30	NO	no	referred	no
post	SURVIVED	1500	30	NO	yes		no	36
post	SURVIVED	1900	30	YES	yes	inborn	no	36.1
post	SURVIVED	1700	30	NO	no	inborn	no	35.2
post	SURVIVED	1900	30	NO	no	inborn	no	36.1
post	SURVIVED	1650	30	NO	no	inborn	no	36
post	SURVIVED	1850	30	YES	yes	inborn	no	35.9
post	SURVIVED	1750	30	YES	no	inborn	no	36.2
post	SURVIVED	1800	30	NO	no	inborn	no	36.5
post	SURVIVED	1600	30	YES	no	inborn	no	36.2
post	SURVIVED	1850	30	YES	yes	inborn	no	35.4
post	SURVIVED	1900	30	YES	no	inborn	no	36.1
post	SURVIVED	1700	30	NO	no	inborn	no	36.6
post	SURVIVED	1800	30	YES	no	inborn	no	36
post	SURVIVED	1700	30	YES	yes	inborn	no	36.4
post	SURVIVED	1700	30	YES	yes	inborn	no	37
post	SURVIVED	1900	30	YES	yes	inborn	no	36
post	SURVIVED	1500	30	YES	yes	inborn	no	37
post	SURVIVED	1500	30	YES	yes	inborn	no	36
post	SURVIVED	1750	30	NO	no	inborn	no	36.4
post	SURVIVED	1400	30	YES	yes	inborn	no	36.3
post	SURVIVED	1950	30	NO	yes	referred	no	36.2
post	SURVIVED	1400	30	NO	no	inborn	no	36.2
post	SURVIVED	1700	30	YES	yes	inborn	no	36.2
post	SURVIVED	800	30	NO	yes	inborn	no	36.7
post	SURVIVED	1450	30	NO	yes	inborn	no	36.6
post	SURVIVED	1700	30	YES	yes	inborn	no	36.2
post	SURVIVED	1700	30	NO	no		no	36.6
post	SURVIVED	1900	30	YES	yes		no	36.7
post	SURVIVED	1650	30	YES	yes		no	37
post	SURVIVED	1900	30	YES	yes		no	35.8
post	SURVIVED	1200	30	YES	yes		no	35.9
post	SURVIVED	1900	30	NO	no		no	36
post	SURVIVED	1600	30	YES	yes		no	35.1
post	SURVIVED	1500	30	NO	no		no	36.6
post	SURVIVED	1850	30	YES	yes		no	36
post	SURVIVED	1900	30	NO	no		no	36.2
post	SURVIVED	1600	30	YES	yes		no	36
post	SURVIVED	1650	30	YES	yes		no	36.6
post	SURVIVED	1800	30	YES	yes		no
post	SURVIVED	1800	30	YES	yes		no	36.5
post	SURVIVED	1300	30	NO	no		no	37
post	SURVIVED	1650	30	YES	yes		no	36.5
post	SURVIVED	1600	30	YES	yes		no	36
post	SURVIVED	1300	30	YES	yes		no	36.9
post	SURVIVED	1600	30	YES	no		no	36.4
post	SURVIVED	1900	30	YES	yes	inborn	no	36.7
post	SURVIVED	1400	30	NO	no	inborn	no	36.8
post	SURVIVED	1800	30	NO	no	inborn	no	36.2
post	SURVIVED	1700	30	NO	no	inborn	no	36.2
post	SURVIVED	1600	30	YES	yes	inborn	no	36.5
post	SURVIVED	1800	30	NO	no	inborn	no	36.2
post	SURVIVED	1600	30	NO	no	inborn	no	36.7
post	SURVIVED	1600	30	NO	no	inborn	no	35
post	SURVIVED	1950	30	NO	no		no	36
post	SURVIVED	1900	30	NO	no		no	36.5
post	SURVIVED	1900	30	NO	no		no	37.3
post	SURVIVED	1400	30	YES	no		no	36.5
post	SURVIVED	1800	30	NO	yes	inborn	no	35
post	SURVIVED	1590	30	NO	yes	inborn	no	36
post	SURVIVED	2350	30	NO	yes	inborn	no	36
post	SURVIVED	1400	30	NO	no	inborn	no
post	SURVIVED	1845	30	NO	no		no
post	SURVIVED	1039	30	NO	no		no	35
post	SURVIVED	1038	30	NO	no		no	36
post	SURVIVED	1900	30	NO	no		no
post	SURVIVED	2000	30	YES	yes	referred	no	36.6
post	SURVIVED	1300	30	NO	yes	referred	no	36.7
post	SURVIVED	1500	30	YES	yes	referred	no	36.9
post	SURVIVED	2100	30	YES	no	referred	no	37
post	SURVIVED	1600	30	YES	yes	referred	no	36.4
post	SURVIVED	1100	30	YES	yes	inborn	no	36.7
post	SURVIVED	1100	30	YES	yes	inborn	no	36.7
post	SURVIVED	1400	30	YES	yes	referred	no	36.7
post	SURVIVED	1000	30	YES	yes	inborn	no	36.9
post	SURVIVED	1600	30	YES	yes	referred	no	37.3
post	SURVIVED	1500	30	NO	yes	referred	no	37.4
post	SURVIVED	1950	30	YES	yes	referred	no	36.6
post	SURVIVED	1200	30	NO	yes	referred	no
post	SURVIVED	1000	30	YES	yes	referred	no	36.4
post	SURVIVED	1100	30	YES	yes	referred	no	36.8
post	SURVIVED	1350	30	YES	yes	referred	no	37.1
post	SURVIVED	1500	30	YES	yes	referred	no	36.9
post	SURVIVED	1500	30	YES	yes	referred	no
post	SURVIVED	1050	30	YES	yes	referred	no	36.6
post	SURVIVED	1500	30	YES	yes	inborn	no	36.4
post	SURVIVED	1350	30	NO	no	inborn	no
post	SURVIVED	1400	30	NO	no	referred	no
post	SURVIVED	2300	30	NO	no	referred	no
post	SURVIVED	1600	30	NO	no	referred	no
post	SURVIVED	1750	30	NO	no	referred	no
post	SURVIVED	1300	30	NO	no	referred	no
post	SURVIVED	3050	30	NO	no	inborn	no	36
post	SURVIVED	1600	30	YES	yes	inborn	no	36.2
post	SURVIVED	1100	30	NO	no	inborn	no	36.6
post	SURVIVED	1700	30	NO	no	inborn	no	37
post	SURVIVED	1750	30	YES	yes	inborn	no	36.6
post	SURVIVED	1600	30	YES	yes	inborn	no	36.4
post	SURVIVED	1800	30	YES	yes	inborn	no	37
post	SURVIVED	1400	30	YES	yes	inborn	no	37.1
post	SURVIVED	1900	30	NO	no	inborn	no	36.1
post	SURVIVED	1600	30	YES	yes	inborn	no	36.7
post	SURVIVED	1750	30	YES	yes	inborn	no	36.2
post	SURVIVED	1100	30	YES	yes	referred	no	36
post	SURVIVED	1600	30	YES	yes	inborn	no	36.1
post	SURVIVED	1850	30	YES	yes	inborn	no	36.3
post	SURVIVED	1900	30	YES	yes	inborn	no	36
post	SURVIVED	1800	30	NO	no	inborn	no	36.3
post	SURVIVED	1700	30	NO	no	inborn	no	36.5
post	SURVIVED	1650	30	NO	no	inborn	no	35.8
pre	DEATH	650	30	NO	no	referred	no
pre	DEATH	1800	30	NO	no	inborn	no
pre	DEATH	1400	30	NO	no	inborn	no
pre	DEATH	1800	30	NO	no	inborn	no
pre	DEATH	1100	30	NO	no	inborn	no
pre	DEATH	900	30	NO	no	referred	no
pre	DEATH	900	30	NO	no	inborn	no
pre	DEATH	1500	30	NO	no	inborn	no
pre	DEATH	1500	30	NO	no	inborn	no
pre	DEATH	1550	30	NO	no	inborn	no
pre	DEATH	1100	30	YES	no	inborn	no	36.2
pre	DEATH	1200	30	NO	no	inborn	no	36.3
pre	DEATH	1000	30	YES	yes	referred	no
post	DEATH	1300	30	NO	no	referred	no
post	DEATH	1600	30	NO	yes	referred	no	36.6
post	DEATH	1650	30	NO	yes	referred	no	36.1
post	DEATH	1600	30	NO	yes	referred	no	36.3
post	DEATH	1300	30	YES	yes	referred	no	36.2
post	DEATH	1300	30	NO	yes	referred	no	36.1
post	DEATH	1850	30	NO	yes	referred	no	36.3
post	DEATH	1520	30	YES	yes	referred	no	35.9
post	DEATH	1200	30	NO	no	referred	no
post	DEATH	1100	30	NO	no	referred	no	36.3
post	DEATH	1100	30	NO	no	referred	no	36.3
post	DEATH	600	30	NO	no	referred	no	36.3
post	DEATH	1750	30	NO	no	referred	no
post	DEATH	1000	30	YES	no	inborn	no	35
post	DEATH	2200	30	NO	no	referred	no
post	DEATH	1350	30	NO	no	inborn	no
post	DEATH	1900	30	YES	yes	referred	no	36.1
post	DEATH	1000	30	YES	yes		no	35.2
post	DEATH	1600	30	YES	yes		no	36
post	DEATH	1600	30	YES	no		no	36.6
post	DEATH	3000	30	NO	no	inborn	no
post	DEATH	1200	30	YES	yes	referred	no	36.5
post	DEATH	1250	30	YES	yes	referred	no	36.8
post	DEATH	1300	30	YES	no	referred	no
post	DEATH	1300	30	YES	yes	referred	no
post	DEATH	1600	30	NO	no	referred	no
pre	SURVIVED	3000	31	YES	yes	referred	yes
pre	SURVIVED	3500	31	YES	yes	referred	yes
pre	SURVIVED	1800	31	YES	yes	inborn	yes
pre	SURVIVED	1500	31	YES	yes	referred	yes	36.5
pre	SURVIVED	1700	31	YES	yes	inborn	yes	36.5
pre	SURVIVED	1500	31	YES	yes	referred	yes	35.9
pre	SURVIVED	1500	31	YES	yes	inborn	yes	35
pre	SURVIVED	1800	31	YES	yes	inborn	yes	35.5
pre	SURVIVED	1400	31	NO	no	inborn	yes
pre	SURVIVED	1900	31	YES	no	referred	yes
pre	SURVIVED	1500	31	NO	no	referred	yes
pre	SURVIVED	2700	31	YES	yes	referred	yes	36
pre	SURVIVED	1700	31	YES	yes	referred	yes	35.8
pre	SURVIVED	1900	31	YES	yes	inborn	yes	36
pre	SURVIVED	1500	31	YES	yes	inborn	yes	36.2
pre	SURVIVED	1370	31	YES	yes	inborn	yes	35
post	SURVIVED	1300	31	YES	yes		yes	37.1
post	SURVIVED	1150	31	YES	yes	inborn	yes	37.2
post	SURVIVED	1300	31	YES	yes	referred	yes	36.5
post	SURVIVED	1300	31	NO	yes	referred	yes	36.2
post	SURVIVED	1200	31	NO	yes		yes	36.9
post	SURVIVED	1000	31	YES	yes	referred	yes	37.3
post	SURVIVED	1000	31	NO	yes	referred	yes	36.2
post	SURVIVED	1200	31	YES	yes		yes	36.2
post	SURVIVED	1200	31	YES	yes		yes	37.2
post	SURVIVED	1150	31	YES	yes	referred	yes	36.2
post	SURVIVED	1150	31	NO	yes		yes	35.8
post	SURVIVED	1700	31	NO	no	inborn	yes	36
post	SURVIVED	1450	31	YES	yes	inborn	yes	35.9
post	SURVIVED	1500	31	YES	yes	inborn	yes	35.9
post	SURVIVED	1500	31	YES	yes	referred	yes	36
post	SURVIVED	1500	31	YES	yes	inborn	yes	36
post	SURVIVED	1200	31	NO	yes	referred	yes	35.8
post	SURVIVED	2100	31	YES	yes	referred	yes	36
post	SURVIVED	1650	31	YES	yes	referred	yes	35.9
post	SURVIVED	1200	31	YES	yes	inborn	yes	36
post	SURVIVED	1150	31	NO	yes	referred	yes	35.6
post	SURVIVED	2050	31	YES	yes	inborn	yes	36.6
post	SURVIVED	1100	31	NO	yes	referred	yes	35.7
post	SURVIVED	1400	31	NO	yes	referred	yes	35.9
post	SURVIVED	1530	31	YES	yes	referred	yes	35.9
post	SURVIVED	1670	31	YES	yes	referred	yes	37.1
post	SURVIVED	2300	31	YES	yes		yes	37
post	SURVIVED	2000	31	YES	yes	referred	yes	36.8
post	SURVIVED	1900	31	YES	yes	referred	yes	36.7
post	SURVIVED	2000	31	YES	yes	referred	yes	36.9
post	SURVIVED	1500	31	YES	yes	inborn	yes	36.9
post	SURVIVED	2300	31	YES	yes	inborn	yes	37
post	SURVIVED	2000	31	YES	yes	inborn	yes	37.3
post	SURVIVED	1600	31	YES	yes	referred	yes	36.5
post	SURVIVED	1400	31	YES	yes	inborn	yes	36.6
post	SURVIVED	1500	31	YES	yes	referred	yes	36.3
post	SURVIVED	1500	31	YES	yes	referred	yes	36.5
post	SURVIVED	1400	31	YES	yes	inborn	yes	37.1
post	SURVIVED	2000	31	YES	yes	referred	yes	36.8
post	SURVIVED	2420	31	YES	yes	referred	yes	36.7
post	SURVIVED	1450	31	YES	yes	referred	yes	36.4
post	SURVIVED	1470	31	YES	yes	referred	yes	36.8
post	SURVIVED	1410	31	YES	yes	referred	yes	36.2
post	SURVIVED	1500	31	YES	yes	inborn	yes	36.9
post	SURVIVED	1690	31	NO	yes	referred	yes	36.1
post	SURVIVED	1600	31	YES	yes	inborn	yes	35.9
post	SURVIVED	1600	31	YES	yes	referred	yes	36.2
post	SURVIVED	2000	31	YES	yes	referred	yes	36.2
post	SURVIVED	2100	31	NO	yes	referred	yes	36
post	SURVIVED	1800	31	YES	yes	inborn	yes	36.5
post	SURVIVED	1850	31	YES	yes	inborn	yes	36.5
post	SURVIVED	1750	31	YES	yes	referred	yes	36.4
post	SURVIVED	1250	31	YES	yes	inborn	yes	36.3
post	SURVIVED	1000	31	YES	yes	referred	yes	37.4
post	SURVIVED	1100	31	YES	yes	referred	yes	36.6
post	SURVIVED	1400	31	YES	yes	inborn	yes	37.1
post	SURVIVED	2260	31	YES	yes	inborn	yes	37.1
post	SURVIVED	1300	31	NO	no	referred	yes
post	SURVIVED	1300	31	YES	yes	referred	yes	36.6
post	SURVIVED	2050	31	NO	no	referred	yes
post	SURVIVED	1000	31	YES	yes	inborn	yes	37.1
post	SURVIVED	1900	31	YES	yes	inborn	yes	36.8
post	SURVIVED	1100	31	NO	no	referred	yes	36
post	SURVIVED	1600	31	NO	no	referred	yes	36.1
post	SURVIVED	2200	31	YES	yes	inborn	yes	36.9
post	SURVIVED	1400	31	YES	yes	inborn	yes	36.9
post	SURVIVED	2200	31	YES	yes	inborn	yes	36.9
post	SURVIVED	1750	31	NO	no	referred	yes	36
post	SURVIVED	1100	31	YES	yes	inborn	yes	36.8
post	SURVIVED	1600	31	YES	yes	inborn	yes	37.1
post	SURVIVED	1500	31	NO	no	referred	yes	36
post	SURVIVED	2200	31	YES	yes	inborn	yes	36.9
post	SURVIVED	1800	31	YES	yes	referred	yes	36.7
post	SURVIVED	2100	31	YES	yes	referred	yes	36.6
post	SURVIVED	1550	31	YES	yes	referred	yes	36.8
post	SURVIVED	2200	31	YES	yes	inborn	yes	36.9
post	SURVIVED	2250	31	YES	yes	inborn	yes	36.8
post	SURVIVED	1270	31	YES	yes	inborn	yes	36.9
post	SURVIVED	2000	31	YES	yes	inborn	yes	36.9
post	SURVIVED	1900	31	NO	no	referred	yes	35.9
post	SURVIVED	1300	31	YES	yes	inborn	yes	36.9
post	SURVIVED	1200	31	YES	yes	referred	yes	36.7
post	SURVIVED	1800	31	YES	yes	inborn	yes	36.9
post	SURVIVED	1300	31	YES	yes	inborn	yes	37.1
post	SURVIVED	1900	31	NO	no	referred	yes
post	SURVIVED	1600	31	YES	yes	inborn	yes	37.1
post	SURVIVED	2100	31	YES	yes	inborn	yes	36
post	SURVIVED	1700	31	YES	yes	inborn	yes	36
post	SURVIVED	1600	31	YES	yes	referred	yes	35.6
post	SURVIVED	2250	31	YES	yes	referred	yes	36
post	SURVIVED	1300	31	YES	yes	referred	yes	36
post	SURVIVED	1600	31	YES	yes	referred	yes	35.5
post	SURVIVED	1650	31	NO	yes	referred	yes	35.9
post	SURVIVED	2250	31	YES	yes	referred	yes	36
post	SURVIVED	1700	31	YES	yes	referred	yes	36.2
post	SURVIVED	1950	31	YES	yes	inborn	yes	36
post	SURVIVED	1300	31	YES	yes	referred	yes	36
post	SURVIVED	1600	31	YES	yes	referred	yes	35.8
post	SURVIVED	2300	31	YES	yes	inborn	yes	36
post	SURVIVED	1900	31	YES	yes	referred	yes	36.8
post	SURVIVED	1900	31	YES	yes	inborn	yes	35.2
post	SURVIVED	1900	31	YES	yes	inborn	yes	36
post	SURVIVED	1900	31	YES	yes		yes	36.8
post	SURVIVED	2150	31	YES	no	inborn	yes	35.2
post	SURVIVED	1900	31	YES	yes		yes	36.4
post	SURVIVED	1080	31	YES	yes		yes	34.9
post	SURVIVED	1200	31	YES	yes	inborn	yes
post	SURVIVED	1500	31	YES	yes	referred	yes
post	SURVIVED	1500	31	YES	yes	inborn	yes
post	SURVIVED	2200	31	YES	yes	referred	yes	36.8
post	SURVIVED	1400	31	YES	yes	inborn	yes
post	SURVIVED	1300	31	YES	yes	inborn	yes
post	SURVIVED	1400	31	NO	yes	inborn	yes
post	SURVIVED	1030	31	YES	yes	inborn	yes
post	SURVIVED	1700	31	NO	yes	referred	yes	36.8
post	SURVIVED	1600	31	YES	yes	referred	yes
post	SURVIVED	1400	31	NO	yes	inborn	yes
post	SURVIVED	1700	31	NO	yes	referred	yes
post	SURVIVED	1400	31	YES	yes	referred	yes
post	SURVIVED	1300	31	YES	yes	inborn	yes	36.6
post	SURVIVED	1350	31	YES	yes	inborn	yes	36.9
post	SURVIVED	2100	31	YES	yes	referred	yes	37.1
post	SURVIVED	1400	31	YES	yes	referred	yes
post	SURVIVED	1800	31	YES	yes	inborn	yes
post	SURVIVED	1900	31	YES	yes	referred	yes
post	SURVIVED	1800	31	YES	yes	inborn	yes
post	SURVIVED	2000	31	YES	yes	inborn	yes
post	SURVIVED	1600	31	YES	yes	inborn	yes
post	SURVIVED	1500	31	YES	yes	inborn	yes	35.9
post	SURVIVED	1300	31	YES	yes	referred	yes	36.9
post	SURVIVED	2450	31	YES	yes	inborn	yes	37.3
post	SURVIVED	1600	31	YES	yes	referred	yes
post	SURVIVED	2000	31	YES	yes	referred	yes
post	SURVIVED	1800	31	YES	yes	inborn	yes
post	SURVIVED	2400	31	YES	yes	inborn	yes
post	SURVIVED	1600	31	YES	yes	referred	yes	36.7
post	SURVIVED	1800	31	YES	yes	referred	yes
post	SURVIVED	1600	31	YES	yes	referred	yes
post	SURVIVED	1900	31	YES	yes	inborn	yes
post	SURVIVED	2000	31	YES	yes	inborn	yes
post	SURVIVED	2100	31	YES	yes	referred	yes
post	SURVIVED	1200	31	YES	yes	referred	yes	37.2
post	SURVIVED	1300	31	YES	yes	referred	yes	36.4
post	SURVIVED	2000	31	YES	yes	inborn	yes	36.9
post	SURVIVED	1600	31	YES	yes	referred	yes	36.7
post	SURVIVED	1800	31	YES	yes	inborn	yes
post	SURVIVED	2200	31	YES	yes	inborn	yes
post	SURVIVED	1600	31	YES	yes	inborn	yes	37.5
post	SURVIVED	2000	31	YES	yes	inborn	yes	36.4
post	SURVIVED	1950	31	YES	yes	referred	yes	37.3
post	SURVIVED	1950	31	YES	yes	referred	yes
post	SURVIVED	800	31	YES	yes	referred	yes
post	SURVIVED	1400	31	YES	yes	referred	yes
post	SURVIVED	2000	31	YES	yes	referred	yes
post	SURVIVED	2400	31	YES	yes	inborn	yes	37.4
post	SURVIVED	1050	31	YES	yes	inborn	yes
post	SURVIVED	1200	31	YES	yes	inborn	yes
post	SURVIVED	1700	31	YES	yes	inborn	yes
post	SURVIVED	1200	31	YES	yes	referred	yes
post	SURVIVED	1140	31	YES	yes	referred	yes
post	SURVIVED	1180	31	YES	yes	referred	yes
post	SURVIVED	1800	31	YES	yes	referred	yes
post	SURVIVED	1800	31	YES	yes	inborn	yes
post	SURVIVED	2300	31	NO	yes	referred	yes	35.8
post	SURVIVED	1250	31	YES	yes	inborn	yes	35.7
post	SURVIVED	1850	31	YES	yes	referred	yes	36
post	SURVIVED	1750	31	YES	yes	inborn	yes	36
post	SURVIVED	1400	31	YES	yes	inborn	yes	36
post	SURVIVED	1700	31	NO	yes	referred	yes	36
post	SURVIVED	1500	31	YES	yes	inborn	yes	36
post	SURVIVED	1850	31	YES	yes	inborn	yes	36
pre	DEATH	1350	31	YES	yes	inborn	yes	35
post	DEATH	800	31	NO	no	referred	yes	35.9
post	DEATH	1150	31	YES	yes	inborn	yes	36
post	DEATH	850	31	NO	no	inborn	yes	37.1
post	DEATH	1750	31	YES	yes	referred	yes	36
post	DEATH	1200	31	YES	yes	referred	yes	36.6
post	DEATH	2450	31	YES	yes	referred	yes	36.1
post	DEATH	1400	31	YES	yes	referred	yes	36.6
post	DEATH	1400	31	NO	no	referred	yes	36.1
post	DEATH	1600	31	YES	yes	referred	yes	36.8
post	DEATH	1200	31	YES	yes	inborn	yes	36.8
post	DEATH	1200	31	NO	yes	referred	yes	35.7
post	DEATH	1665	31	YES	yes	inborn	yes	35
post	DEATH	900	31	YES	no	referred	yes	36.6
post	DEATH	1000	31	YES	no	referred	yes	36.8
post	DEATH	1500	31	YES	no	inborn	yes	36
post	DEATH	1200	31	YES	yes	inborn	yes	36.8
post	DEATH	1600	31	NO	yes	referred	yes
post	DEATH	800	31	YES	yes	inborn	yes
post	DEATH	2000	31	YES	yes	referred	yes
post	DEATH	750	31	YES	yes	referred	yes
post	DEATH	1700	31	NO	yes	referred	yes	35.8
post	DEATH	1200	31	NO	yes	referred	yes	36
post	DEATH	1750	31	YES	no	inborn	yes	36.2
pre	SURVIVED	3150	31	NO	no	referred	no
pre	SURVIVED	1300	31	NO	no	inborn	no
pre	SURVIVED	1400	31	NO	no	inborn	no
pre	SURVIVED	1800	31	NO	no	referred	no
pre	SURVIVED	2300	31	NO	no	referred	no
pre	SURVIVED	1650	31	NO	no	referred	no
pre	SURVIVED	1400	31	NO	no	referred	no
pre	SURVIVED	1900	31	YES	no	referred	no
pre	SURVIVED	1650	31	NO	no	referred	no
pre	SURVIVED	1600	31	NO	no	referred	no
pre	SURVIVED	1700	31	NO	no	referred	no
pre	SURVIVED	1900	31	NO	no	referred	no
pre	SURVIVED	2300	31	NO	no	inborn	no
pre	SURVIVED	1200	31	YES	yes	inborn	no	36.3
pre	SURVIVED	1600	31	YES	yes	inborn	no	36.2
pre	SURVIVED	1700	31	NO	no	inborn	no	36.6
pre	SURVIVED	2080	31	NO	no	inborn	no
pre	SURVIVED	1630	31	NO	no	inborn	no
pre	SURVIVED	1400	31	NO	no	inborn	no
pre	SURVIVED	2000	31	NO	no		no
post	SURVIVED	1600	31	YES	yes	referred	no	36.7
post	SURVIVED	1300	31	NO	yes		no	36.1
post	SURVIVED	1380	31	YES	yes	referred	no	36.3
post	SURVIVED	1800	31	NO	yes	referred	no	36.4
post	SURVIVED	1450	31	YES	yes	referred	no	36
post	SURVIVED	1800	31	NO	no	referred	no	36
post	SURVIVED	2100	31	NO	no	referred	no	36
post	SURVIVED	1900	31	NO	no	referred	no	35.9
post	SURVIVED	1600	31	NO	no	referred	no	36.4
post	SURVIVED	2150	31	NO	no	referred	no	36.4
post	SURVIVED	2100	31	NO	no	referred	no	36.4
post	SURVIVED	1800	31	NO	no	referred	no	36.3
post	SURVIVED	1600	31	NO	no	referred	no
post	SURVIVED	2200	31	NO	no	referred	no
post	SURVIVED	1800	31	YES	yes	inborn	no	36.2
post	SURVIVED	1800	31	YES	yes		no	36.5
post	SURVIVED	1700	31	YES	yes		no	36.1
post	SURVIVED	1600	31	YES	yes		no	36.4
post	SURVIVED	1400	31	NO	no		no	36.7
post	SURVIVED	1600	31	YES	yes		no	36.3
post	SURVIVED	1800	31	NO	no		no	37.4
post	SURVIVED	1510	31	NO	no	referred	no
post	SURVIVED	2045	31	NO	no	referred	no
post	SURVIVED	2130	31	YES	yes	referred	no	37
post	SURVIVED	1550	31	YES	yes	referred	no
post	SURVIVED	1100	31	NO	yes	referred	no	36.5
post	SURVIVED	1550	31	NO	yes	referred	no	36.1
post	SURVIVED	1650	31	NO	yes	referred	no	36.3
post	SURVIVED	1400	31	YES	yes	inborn	no	37
post	SURVIVED	1900	31	YES	yes	referred	no	37.2
post	SURVIVED	1540	31	YES	yes	referred	no	36.7
post	SURVIVED	2100	31	YES	yes	inborn	no
post	SURVIVED	2100	31	YES	yes	referred	no	36.9
post	SURVIVED	1000	31	NO	yes	referred	no	36.7
post	SURVIVED	1600	31	NO	yes	referred	no	36.5
post	SURVIVED	2300	31	NO	yes	referred	no	36.6
post	SURVIVED	2200	31	NO	yes	referred	no	36.9
post	SURVIVED	1700	31	YES	yes	referred	no
post	SURVIVED	2300	31	YES	yes	referred	no	37.3
post	SURVIVED	1800	31	YES	yes	inborn	no
post	SURVIVED	2100	31	YES	yes	referred	no	36.5
post	SURVIVED	1700	31	NO	no	referred	no
post	SURVIVED	1750	31	NO	no	referred	no
post	SURVIVED	1450	31	NO	no	inborn	no
post	SURVIVED	1800	31	NO	no	inborn	no	37
post	SURVIVED	1950	31	YES	yes	inborn	no	35.5
post	SURVIVED	1700	31	YES	yes	inborn	no	36
pre	DEATH	1800	31	NO	no	inborn	no
pre	DEATH	1500	31	NO	no	referred	no
pre	DEATH	1100	31	NO	no	inborn	no
pre	DEATH	1800	31	NO	yes	referred	no	35.9
pre	DEATH	1700	31	NO	no	inborn	no
pre	DEATH	1050	31	NO	no	inborn	no
post	DEATH	1750	31	YES	yes	referred	no	36.4
post	DEATH	1300	31	YES	no	inborn	no	35
post	DEATH	1300	31	NO	no	inborn	no
post	DEATH	1200	31	NO	no	inborn	no
post	DEATH	1250	31	YES	yes	referred	no
post	DEATH	1000	31	YES	yes	referred	no	36.8
post	DEATH	1300	31	YES	yes	referred	no	36.7
post	DEATH	1700	31	YES	no	referred	no	36.6
post	DEATH	1400	31	YES	yes	referred	no	36.6
post	DEATH	1800	31	YES	no	inborn	no
post	DEATH	1250	31	NO	no	inborn	no
pre	SURVIVED	2300	32	YES	yes	inborn	yes	36.5
pre	SURVIVED	1600	32	YES	yes	referred	yes
pre	SURVIVED	1700	32	YES	yes	inborn	yes
pre	SURVIVED	2000	32	YES	yes	referred	yes
pre	SURVIVED	1900	32	YES	yes	inborn	yes
pre	SURVIVED	2200	32	YES	yes	inborn	yes	36
pre	SURVIVED	2450	32	YES	yes	referred	yes
pre	SURVIVED	1800	32	YES	yes	referred	yes	36.9
pre	SURVIVED	1800	32	YES	yes	referred	yes	35.5
pre	SURVIVED	2400	32	YES	yes	inborn	yes	35.8
pre	SURVIVED	2400	32	YES	yes	referred	yes	35.8
pre	SURVIVED	1600	32	NO	no	inborn	yes
pre	SURVIVED	1500	32	NO	no	inborn	yes
pre	SURVIVED	1700	32	NO	no	referred	yes
pre	SURVIVED	1100	32	NO	no	inborn	yes
pre	SURVIVED	2000	32	YES	no	referred	yes
pre	SURVIVED	2000	32	YES	yes	inborn	yes	36.2
pre	SURVIVED	1900	32	YES	yes	referred	yes	36
pre	SURVIVED	2000	32	YES	yes	referred	yes
pre	SURVIVED	1800	32	YES	yes	inborn	yes	36.2
pre	SURVIVED	1700	32	YES	yes	referred	yes	35.8
pre	SURVIVED	2500	32	YES	yes	inborn	yes	36
pre	SURVIVED	2200	32	YES	yes	inborn	yes	36
pre	SURVIVED	1900	32	YES	yes	inborn	yes	36
pre	SURVIVED	1300	32	YES	yes	inborn	yes	36.4
pre	SURVIVED	1800	32	YES	yes	inborn	yes	36.7
pre	SURVIVED	1400	32	YES	yes	inborn	yes	36
pre	SURVIVED	1400	32	YES	yes	inborn	yes	36.7
pre	SURVIVED	1950	32	YES	no	inborn	yes	36.4
pre	SURVIVED	1710	32	YES	yes	inborn	yes	36.1
post	SURVIVED	1100	32	NO	yes	inborn	yes	37.2
post	SURVIVED	1300	32	YES	yes	referred	yes	36.9
post	SURVIVED	1100	32	YES	yes	referred	yes	36.2
post	SURVIVED	1600	32	YES	yes		yes	36.1
post	SURVIVED	1900	32	YES	yes	inborn	yes	37.1
post	SURVIVED	2200	32	YES	yes	referred	yes	36.8
post	SURVIVED	1100	32	YES	yes	inborn	yes	36
post	SURVIVED	1200	32	YES	yes		yes	37.1
post	SURVIVED	1850	32	YES	yes	referred	yes	36.1
post	SURVIVED	1300	32	YES	yes	inborn	yes	37.2
post	SURVIVED	1100	32	YES	yes		yes	36
post	SURVIVED	1300	32	YES	yes	referred	yes	36.5
post	SURVIVED	1000	32	YES	yes	referred	yes	36.2
post	SURVIVED	1600	32	NO	yes	referred	yes	36.8
post	SURVIVED	1000	32	YES	yes	inborn	yes	37.3
post	SURVIVED	1300	32	YES	yes	inborn	yes	36.4
post	SURVIVED	1850	32	YES	yes		yes	36.2
post	SURVIVED	1700	32	YES	yes	inborn	yes	37.1
post	SURVIVED	1100	32	YES	yes	referred	yes	36.6
post	SURVIVED	2200	32	YES	yes	inborn	yes	36.4
post	SURVIVED	1400	32	NO	no	referred	yes	35.5
post	SURVIVED	1750	32	YES	yes	inborn	yes	36
post	SURVIVED	1600	32	YES	yes	inborn	yes	35.9
post	SURVIVED	1700	32	YES	yes	inborn	yes	36
post	SURVIVED	1600	32	YES	yes	referred	yes	35.5
post	SURVIVED	1500	32	YES	yes	inborn	yes	35.3
post	SURVIVED	1800	32	NO	yes	referred	yes	36
post	SURVIVED	1400	32	YES	yes	referred	yes	35.9
post	SURVIVED	2400	32	YES	yes	inborn	yes	35.4
post	SURVIVED	1200	32	YES	yes	referred	yes	35
post	SURVIVED	1900	32	YES	yes	referred	yes	35.9
post	SURVIVED	2300	32	YES	yes	referred	yes	36
post	SURVIVED	1700	32	NO	yes	inborn	yes	35.9
post	SURVIVED	2130	32	YES	yes	referred	yes	36.9
post	SURVIVED	1600	32	YES	yes		yes	37.2
post	SURVIVED	1900	32	YES	yes	referred	yes	37
post	SURVIVED	1800	32	YES	yes	referred	yes	37.6
post	SURVIVED	1500	32	YES	yes	inborn	yes	37
post	SURVIVED	1650	32	YES	yes	referred	yes	37.3
post	SURVIVED	1800	32	YES	yes	referred	yes	36.5
post	SURVIVED	1300	32	YES	yes	inborn	yes	36.6
post	SURVIVED	1600	32	YES	yes	inborn	yes	37.3
post	SURVIVED	1600	32	YES	yes	inborn	yes	37.5
post	SURVIVED	2100	32	NO	yes	referred	yes	36.4
post	SURVIVED	2100	32	NO	yes	referred	yes	36.7
post	SURVIVED	1600	32	YES	yes	referred	yes	37
post	SURVIVED	2000	32	YES	yes	inborn	yes	36.4
post	SURVIVED	2300	32	YES	yes	referred	yes	37.3
post	SURVIVED	1450	32	YES	yes	inborn	yes	36.6
post	SURVIVED	1700	32	YES	yes	inborn	yes	36.5
post	SURVIVED	1100	32	NO	yes	referred	yes	36
post	SURVIVED	2200	32	YES	yes	referred	yes	36.4
post	SURVIVED	2200	32	YES	yes	referred	yes	37.2
post	SURVIVED	2300	32	YES	yes	referred	yes	37.2
post	SURVIVED	1500	32	NO	yes	referred	yes	36.1
post	SURVIVED	2000	32	YES	yes	inborn	yes	37.7
post	SURVIVED	2200	32	YES	yes	referred	yes	37.3
post	SURVIVED	1375	32	YES	yes	inborn	yes	36.7
post	SURVIVED	1600	32	YES	yes	referred	yes	37.2
post	SURVIVED	2200	32	YES	yes	referred	yes	37.2
post	SURVIVED	2200	32	NO	yes	referred	yes	35.9
post	SURVIVED	2100	32	NO	yes	referred	yes	36
post	SURVIVED	1600	32	YES	yes	referred	yes	36.9
post	SURVIVED	1300	32	YES	yes	referred	yes	36.5
post	SURVIVED	1400	32	NO	yes	referred	yes	35.8
post	SURVIVED	2000	32	YES	yes	inborn	yes	36.8
post	SURVIVED	1700	32	YES	yes	inborn	yes	36.7
post	SURVIVED	1800	32	YES	yes	referred	yes	35.7
post	SURVIVED	1750	32	YES	yes	inborn	yes	36.5
post	SURVIVED	1750	32	YES	yes	inborn	yes	36.6
post	SURVIVED	1700	32	YES	yes	referred	yes	36.1
post	SURVIVED	1200	32	YES	yes	referred	yes	36.2
post	SURVIVED	2050	32	YES	yes	referred	yes	36.6
post	SURVIVED	1800	32	YES	yes	referred	yes	37
post	SURVIVED	1900	32	YES	yes	referred	yes	36.6
post	SURVIVED	1900	32	YES	yes	referred	yes	36.5
post	SURVIVED	2200	32	YES	yes	referred	yes	36.8
post	SURVIVED	1500	32	YES	yes	referred	yes	36.1
post	SURVIVED	1900	32	YES	yes	referred	yes	36.9
post	SURVIVED	1700	32	YES	yes	referred	yes	36.8
post	SURVIVED	1500	32	NO	yes	referred	yes	36.9
post	SURVIVED	1600	32	YES	yes	referred	yes	36.7
post	SURVIVED	1850	32	NO	yes	referred	yes	35.7
post	SURVIVED	1900	32	YES	yes	inborn	yes	36.9
post	SURVIVED	1900	32	YES	yes	referred	yes	36.2
post	SURVIVED	1800	32	YES	yes	inborn	yes	36.8
post	SURVIVED	1350	32	YES	yes	inborn	yes	36.5
post	SURVIVED	2100	32	YES	yes	inborn	yes	36.4
post	SURVIVED	1660	32	YES	yes	referred	yes	36.8
post	SURVIVED	2400	32	NO	yes	inborn	yes	36.4
post	SURVIVED	2400	32	YES	yes	referred	yes	36.6
post	SURVIVED	1700	32	YES	yes	inborn	yes	36.3
post	SURVIVED	1500	32	YES	yes	inborn	yes	36.2
post	SURVIVED	1500	32	NO	yes	inborn	yes	36.3
post	SURVIVED	1900	32	YES	yes	inborn	yes	36.9
post	SURVIVED	1200	32	YES	yes	referred	yes	36
post	SURVIVED	2300	32	YES	yes	referred	yes	36.2
post	SURVIVED	1850	32	YES	yes	inborn	yes	36
post	SURVIVED	1800	32	YES	yes	referred	yes	37
post	SURVIVED	1700	32	YES	yes	referred	yes	36.3
post	SURVIVED	1750	32	YES	yes	referred	yes	36.6
post	SURVIVED	1520	32	YES	yes	referred	yes	36.8
post	SURVIVED	2000	32	YES	yes	referred	yes	36.2
post	SURVIVED	1900	32	YES	yes	referred	yes	36.8
post	SURVIVED	1450	32	YES	yes	referred	yes	36.5
post	SURVIVED	1900	32	YES	yes	referred	yes	36
post	SURVIVED	2200	32	YES	yes	referred	yes	36.7
post	SURVIVED	1500	32	YES	yes	inborn	yes	36.4
post	SURVIVED	1400	32	YES	yes	referred	yes	36.6
post	SURVIVED	1450	32	YES	yes	inborn	yes	36.1
post	SURVIVED	1600	32	YES	yes	inborn	yes	37.1
post	SURVIVED	2200	32	YES	yes	referred	yes	37.2
post	SURVIVED	1500	32	NO	yes	inborn	yes	36.3
post	SURVIVED	2100	32	NO	yes	referred	yes	36.8
post	SURVIVED	1400	32	YES	yes	referred	yes	36.5
post	SURVIVED	2000	32	YES	yes	inborn	yes	36.8
post	SURVIVED	1400	32	NO	no	referred	yes	36.4
post	SURVIVED	1520	32	YES	yes	referred	yes	36.8
post	SURVIVED	2100	32	NO	no	referred	yes	36.1
post	SURVIVED	1900	32	NO	no	referred	yes	36.1
post	SURVIVED	2100	32	YES	yes	referred	yes	36.5
post	SURVIVED	1290	32	YES	yes	referred	yes	36.7
post	SURVIVED	1750	32	YES	yes	inborn	yes	37.1
post	SURVIVED	1800	32	YES	yes	inborn	yes	37.1
post	SURVIVED	1900	32	NO	no	referred	yes	36.2
post	SURVIVED	2000	32	YES	yes	referred	yes	36.6
post	SURVIVED	1900	32	YES	yes	inborn	yes	37
post	SURVIVED	2200	32	YES	yes	inborn	yes	36.8
post	SURVIVED	1700	32	NO	no	referred	yes	36.1
post	SURVIVED	2210	32	YES	yes	inborn	yes	36.8
post	SURVIVED	2100	32	YES	yes	referred	yes	36.5
post	SURVIVED	1800	32	YES	yes	inborn	yes	37.1
post	SURVIVED	2000	32	YES	yes	referred	yes	36.6
post	SURVIVED	2300	32	YES	yes	referred	yes	36.6
post	SURVIVED	1900	32	NO	no	referred	yes	36.2
post	SURVIVED	1600	32	NO	no	referred	yes	36
post	SURVIVED	1800	32	NO	no	referred	yes	36
post	SURVIVED	2000	32	YES	yes	inborn	yes	36.8
post	SURVIVED	2400	32	YES	yes	referred	yes	36.7
post	SURVIVED	1800	32	YES	yes	referred	yes	36.7
post	SURVIVED	1500	32	YES	yes	referred	yes	36.6
post	SURVIVED	2000	32	YES	yes	inborn	yes	36.8
post	SURVIVED	2050	32	YES	yes	referred	yes	36.8
post	SURVIVED	1850	32	NO	no	referred	yes	36.3
post	SURVIVED	1800	32	YES	yes	inborn	yes	36.9
post	SURVIVED	1650	32	YES	yes	inborn	yes	36.8
post	SURVIVED	2000	32	YES	yes	referred	yes	36.6
post	SURVIVED	1600	32	YES	yes	inborn	yes	37
post	SURVIVED	2000	32	NO	no	referred	yes	36.2
post	SURVIVED	2100	32	NO	no	referred	yes	36.2
post	SURVIVED	1800	32	YES	yes	inborn	yes	37.5
post	SURVIVED	1900	32	YES	yes	referred	yes	37.3
post	SURVIVED	2200	32	YES	yes	referred	yes	36.6
post	SURVIVED	1800	32	YES	yes	inborn	yes	37
post	SURVIVED	1500	32	YES	yes	inborn	yes	37.1
post	SURVIVED	1650	32	YES	yes	inborn	yes	36.8
post	SURVIVED	2000	32	YES	yes	inborn	yes	37
post	SURVIVED	2000	32	YES	yes	referred	yes	36.6
post	SURVIVED	1700	32	NO	no	referred	yes	36
post	SURVIVED	1500	32	YES	yes	referred	yes	36.6
post	SURVIVED	1500	32	YES	yes	inborn	yes	37
post	SURVIVED	1750	32	YES	yes	inborn	yes	37
post	SURVIVED	1000	32	YES	yes	inborn	yes	37.1
post	SURVIVED	1600	32	YES	yes	inborn	yes	37
post	SURVIVED	1900	32	YES	yes	inborn	yes	37.1
post	SURVIVED	1150	32	YES	yes	inborn	yes	37
post	SURVIVED	1540	32	YES	yes	inborn	yes	37
post	SURVIVED	2100	32	YES	yes	inborn	yes	36.8
post	SURVIVED	1800	32	YES	yes	referred	yes	36.8
post	SURVIVED	1900	32	YES	yes	referred	yes	36.5
post	SURVIVED	2400	32	NO	no	referred	yes	36.2
post	SURVIVED	2100	32	YES	yes	inborn	yes	36.8
post	SURVIVED	2300	32	YES	yes	referred	yes	36.5
post	SURVIVED	1500	32	YES	yes	referred	yes	36.6
post	SURVIVED	1400	32	NO	no	referred	yes	36.4
post	SURVIVED	1700	32	YES	yes	referred	yes	36.5
post	SURVIVED	1700	32	YES	yes	inborn	yes	37.1
post	SURVIVED	1700	32	YES	yes	inborn	yes	37.1
post	SURVIVED	1800	32	YES	yes	referred	yes	36.8
post	SURVIVED	1900	32	NO	no	referred	yes	36.4
post	SURVIVED	2100	32	NO	no	referred	yes	36.4
post	SURVIVED	1500	32	YES	yes	inborn	yes	37.1
post	SURVIVED	2200	32	YES	yes	inborn	yes	37.1
post	SURVIVED	1300	32	YES	yes	inborn	yes	37
post	SURVIVED	1800	32	YES	yes	referred	yes	36.5
post	SURVIVED	2100	32	YES	yes	referred	yes	36.6
post	SURVIVED	1700	32	YES	yes	inborn	yes	37
post	SURVIVED	1700	32	YES	yes	referred	yes	36.6
post	SURVIVED	2000	32	NO	no	referred	yes	36.4
post	SURVIVED	1200	32	YES	yes	referred	yes	37.3
post	SURVIVED	2000	32	YES	yes	inborn	yes	37.1
post	SURVIVED	2000	32	YES	yes	inborn	yes	37.1
post	SURVIVED	1900	32	YES	yes	inborn	yes	37
post	SURVIVED	2000	32	YES	yes	inborn	yes	37.1
post	SURVIVED	1800	32	YES	yes	inborn	yes	37.1
post	SURVIVED	1800	32	YES	yes	inborn	yes	36
post	SURVIVED	1600	32	NO	yes	referred	yes	35.8
post	SURVIVED	1650	32	NO	yes	inborn	yes	35.9
post	SURVIVED	2300	32	NO	yes	referred	yes	36
post	SURVIVED	1600	32	NO	yes	inborn	yes	35.8
post	SURVIVED	2100	32	YES	yes	inborn	yes	35.7
post	SURVIVED	1600	32	YES	yes	referred	yes	35.9
post	SURVIVED	1600	32	YES	yes	referred	yes	35.8
post	SURVIVED	2550	32	NO	yes	referred	yes	35.5
post	SURVIVED	1600	32	YES	yes	referred	yes	36
post	SURVIVED	1150	32	YES	yes	referred	yes	35.8
post	SURVIVED	1700	32	NO	yes	referred	yes	35.9
post	SURVIVED	1800	32	YES	yes	referred	yes	36
post	SURVIVED	1400	32	NO	yes	referred	yes	35.6
post	SURVIVED	2100	32	NO	yes	referred	yes	36
post	SURVIVED	2100	32	NO	yes	referred	yes	36
post	SURVIVED	2200	32	YES	yes	inborn	yes	36
post	SURVIVED	1600	32	YES	yes	referred	yes	36
post	SURVIVED	1950	32	YES	yes	inborn	yes	36
post	SURVIVED	950	32	YES	yes	inborn	yes	36
post	SURVIVED	1950	32	YES	yes	inborn	yes	36
post	SURVIVED	1900	32	YES	yes	inborn	yes	36.1
post	SURVIVED	1800	32	YES	yes		yes	36.5
post	SURVIVED	1950	32	YES	yes		yes	36.2
post	SURVIVED	2115	32	NO	yes		yes	36
post	SURVIVED	1810	32	YES	yes		yes	36
post	SURVIVED	2100	32	YES	yes	inborn	yes
post	SURVIVED	1900	32	YES	yes	inborn	yes
post	SURVIVED	2200	32	YES	yes	referred	yes
post	SURVIVED	2000	32	YES	yes	inborn	yes
post	SURVIVED	2300	32	YES	yes	inborn	yes
post	SURVIVED	1500	32	YES	yes	inborn	yes
post	SURVIVED	1700	32	YES	yes	inborn	yes	37.1
post	SURVIVED	2300	32	YES	yes	inborn	yes
post	SURVIVED	2200	32	YES	yes	inborn	yes	37.1
post	SURVIVED	2300	32	YES	yes	referred	yes
post	SURVIVED	1850	32	YES	yes	inborn	yes
post	SURVIVED	2000	32	NO	yes	referred	yes
post	SURVIVED	1600	32	YES	yes	inborn	yes	37.4
post	SURVIVED	2200	32	NO	yes	referred	yes
post	SURVIVED	1400	32	YES	yes	inborn	yes
post	SURVIVED	2400	32	YES	yes	inborn	yes
post	SURVIVED	1450	32	YES	yes	referred	yes
post	SURVIVED	1350	32	YES	yes	referred	yes
post	SURVIVED	1900	32	YES	yes	inborn	yes	36.5
post	SURVIVED	1200	32	YES	yes	referred	yes	36.5
post	SURVIVED	2200	32	YES	yes	referred	yes	37.2
post	SURVIVED	1800	32	YES	yes	inborn	yes	36.9
post	SURVIVED	2300	32	YES	yes	referred	yes	37
post	SURVIVED	2000	32	YES	yes	referred	yes
post	SURVIVED	1900	32	YES	yes	referred	yes
post	SURVIVED	1900	32	YES	yes	inborn	yes	36.8
post	SURVIVED	1900	32	YES	yes	referred	yes	36.9
post	SURVIVED	1030	32	YES	yes	referred	yes
post	SURVIVED	1700	32	YES	yes	inborn	yes
post	SURVIVED	1900	32	YES	yes	referred	yes	37.2
post	SURVIVED	1600	32	YES	yes	referred	yes
post	SURVIVED	1700	32	YES	yes	inborn	yes
post	SURVIVED	2250	32	YES	yes	inborn	yes
post	SURVIVED	1500	32	YES	yes	inborn	yes
post	SURVIVED	1900	32	YES	yes	referred	yes
post	SURVIVED	1500	32	YES	yes	referred	yes	37
post	SURVIVED	1500	32	YES	yes	inborn	yes
post	SURVIVED	1300	32	YES	yes	referred	yes
post	SURVIVED	2200	32	YES	yes	inborn	yes	36.7
post	SURVIVED	1000	32	YES	yes	referred	yes	37.1
post	SURVIVED	1500	32	YES	yes	inborn	yes	36.4
post	SURVIVED	1600	32	YES	yes	referred	yes
post	SURVIVED	1650	32	YES	yes	referred	yes	36.9
post	SURVIVED	1200	32	YES	yes	inborn	yes
post	SURVIVED	1800	32	YES	yes	referred	yes
post	SURVIVED	1550	32	YES	yes	inborn	yes	36.4
post	SURVIVED	1800	32	YES	yes	inborn	yes	36.8
post	SURVIVED	1500	32	YES	yes	inborn	yes	36.6
post	SURVIVED	1700	32	YES	yes	inborn	yes
post	SURVIVED	2000	32	YES	yes	referred	yes	36.7
post	SURVIVED	1600	32	YES	yes	referred	yes	37.2
post	SURVIVED	1300	32	YES	yes	inborn	yes
post	SURVIVED	1300	32	YES	yes	referred	yes
post	SURVIVED	1800	32	YES	yes	referred	yes
post	SURVIVED	1900	32	YES	yes	inborn	yes	36.8
post	SURVIVED	1800	32	YES	yes	inborn	yes	36.6
post	SURVIVED	1600	32	YES	yes	inborn	yes
post	SURVIVED	2000	32	YES	yes	inborn	yes
post	SURVIVED	1700	32	YES	yes	referred	yes	36.9
post	SURVIVED	1700	32	YES	yes	referred	yes	37.2
post	SURVIVED	1500	32	YES	yes	inborn	yes	36.8
post	SURVIVED	1700	32	YES	yes	inborn	yes	36.7
post	SURVIVED	1800	32	YES	yes	referred	yes
post	SURVIVED	1600	32	YES	yes	inborn	yes	36.8
post	SURVIVED	2200	32	YES	yes	inborn	yes	36.9
post	SURVIVED	1700	32	YES	yes	inborn	yes	36
post	SURVIVED	1300	32	YES	yes	referred	yes
post	SURVIVED	1100	32	YES	yes	inborn	yes	36.4
post	SURVIVED	1700	32	YES	yes	referred	yes	36.9
post	SURVIVED	1600	32	YES	yes	referred	yes	35.9
post	SURVIVED	2000	32	YES	yes	inborn	yes
post	SURVIVED	2400	32	YES	yes	referred	yes
post	SURVIVED	1700	32	YES	yes	referred	yes
post	SURVIVED	1800	32	YES	yes	inborn	yes	37.2
post	SURVIVED	1900	32	YES	yes	referred	yes
post	SURVIVED	1900	32	NO	yes	referred	yes
post	SURVIVED	2000	32	YES	yes	inborn	yes
post	SURVIVED	2000	32	YES	yes	referred	yes
post	SURVIVED	1650	32	YES	yes	inborn	yes	37.3
post	SURVIVED	2100	32	NO	yes	referred	yes
post	SURVIVED	1900	32	YES	yes	inborn	yes
post	SURVIVED	1500	32	YES	yes	inborn	yes
post	SURVIVED	1200	32	YES	yes	inborn	yes
post	SURVIVED	2050	32	YES	yes	inborn	yes
post	SURVIVED	2400	32	NO	yes	referred	yes
post	SURVIVED	1900	32	NO	yes	referred	yes
post	SURVIVED	2000	32	YES	yes	inborn	yes
post	SURVIVED	2200	32	YES	yes	referred	yes
post	SURVIVED	2000	32	YES	yes	inborn	yes
post	SURVIVED	2200	32	YES	yes	referred	yes
post	SURVIVED	2300	32	YES	yes	referred	yes
post	SURVIVED	1000	32	YES	yes	inborn	yes
post	SURVIVED	2100	32	YES	yes	referred	yes
post	SURVIVED	1250	32	YES	yes	inborn	yes
post	SURVIVED	1400	32	YES	yes	inborn	yes
post	SURVIVED	1300	32	YES	yes	inborn	yes
post	SURVIVED	1800	32	YES	yes	inborn	yes
post	SURVIVED	1550	32	YES	yes	referred	yes	37.1
post	SURVIVED	900	32	YES	yes	referred	yes	37.1
post	SURVIVED	1100	32	YES	yes	referred	yes	36.7
post	SURVIVED	1500	32	YES	yes	inborn	yes	36.1
post	SURVIVED	4500	32	YES	yes	inborn	yes	35.6
post	SURVIVED	2250	32	YES	yes	inborn	yes	36
post	SURVIVED	1900	32	YES	yes	inborn	yes	36
post	SURVIVED	2500	32	YES	yes	inborn	yes	36
post	SURVIVED	1650	32	YES	yes	referred	yes	35.8
post	SURVIVED	1350	32	YES	yes	inborn	yes	35.9
post	SURVIVED	1300	32	YES	yes	referred	yes	36.2
post	SURVIVED	1950	32	YES	yes	referred	yes	36
post	SURVIVED	2200	32	YES	yes	referred	yes	36
post	SURVIVED	1650	32	YES	yes	inborn	yes	36.1
post	SURVIVED	1300	32	YES	yes	inborn	yes	35.8
post	SURVIVED	1800	32	YES	yes	inborn	yes	35.8
post	SURVIVED	1750	32	YES	yes	inborn	yes	36
post	SURVIVED	1150	32	YES	yes	inborn	yes	36
post	SURVIVED	1700	32	YES	yes	inborn	yes	36
post	SURVIVED	1900	32	YES	yes	inborn	yes	37
post	SURVIVED	1400	32	YES	yes	inborn	yes	36
post	SURVIVED	1000	32	YES	yes	inborn	yes	36
pre	DEATH	2300	32	YES	yes	referred	yes
pre	DEATH	1750	32	YES	yes	referred	yes	35.8
pre	DEATH	1400	32	NO	no	referred	yes
pre	DEATH	1700	32	NO	yes	inborn	yes	35
pre	DEATH	1050	32	NO	yes	inborn	yes
post	DEATH	1020	32	NO	no		yes	35.9
post	DEATH	1000	32	NO	no	referred	yes	37.1
post	DEATH	1300	32	YES	yes		yes	36.4
post	DEATH	1100	32	YES	yes	referred	yes	36.2
post	DEATH	1100	32	YES	yes	inborn	yes	35.5
post	DEATH	1800	32	NO	yes	inborn	yes	36
post	DEATH	1500	32	YES	yes	inborn	yes	36.7
post	DEATH	1400	32	YES	yes	inborn	yes	36.9
post	DEATH	1500	32	YES	yes	referred	yes	36.1
post	DEATH	1700	32	NO	yes	referred	yes	36.5
post	DEATH	1090	32	NO	no	referred	yes
post	DEATH	1300	32	NO	no	referred	yes	36
post	DEATH	2100	32	NO	no	referred	yes	36.1
post	DEATH	1200	32	YES	yes	referred	yes	36.6
post	DEATH	1800	32	YES	yes	referred	yes	36.7
post	DEATH	1400	32	NO	no	referred	yes
post	DEATH	1400	32	YES	yes	inborn	yes	37.1
post	DEATH	1700	32	YES	yes	inborn	yes	37
post	DEATH	900	32	YES	yes	inborn	yes	37
post	DEATH	1800	32	NO	no	referred	yes	36.1
post	DEATH	1900	32	YES	yes	referred	yes	36.6
post	DEATH	2400	32	NO	no	referred	yes
post	DEATH	1400	32	NO	yes	referred	yes	35.8
post	DEATH	1200	32	YES	yes	inborn	yes	36
post	DEATH	1545	32	NO	yes		yes	36.5
post	DEATH	1500	32	YES	yes	inborn	yes
post	DEATH	1600	32	YES	no	referred	yes	36.8
post	DEATH	2100	32	NO	yes	referred	yes
post	DEATH	1100	32	YES	yes	inborn	yes
post	DEATH	2000	32	YES	no	inborn	yes
post	DEATH	1900	32	YES	yes	referred	yes
post	DEATH	2200	32	YES	no	referred	yes
post	DEATH	1200	32	YES	yes	inborn	yes
post	DEATH	1800	32	YES	no	referred	yes
post	DEATH	1300	32	NO	yes	referred	yes	35
post	DEATH	1700	32	NO	yes	referred	yes	35.7
pre	SURVIVED	2200	32	NO	no	referred	no
pre	SURVIVED	1700	32	NO	no	referred	no
pre	SURVIVED	2000	32	NO	no	referred	no
pre	SURVIVED	1600	32	YES	yes	inborn	no
pre	SURVIVED	1800	32	NO	no	inborn	no
pre	SURVIVED	1150	32	NO	no	inborn	no
pre	SURVIVED	3000	32	NO	no	inborn	no
pre	SURVIVED	2900	32	NO	no	inborn	no
pre	SURVIVED	1800	32	NO	no	inborn	no
pre	SURVIVED	1500	32	YES	yes	inborn	no
pre	SURVIVED	1800	32	NO	no	inborn	no
pre	SURVIVED	1950	32	NO	no	inborn	no
pre	SURVIVED	1680	32	NO	no	inborn	no
pre	SURVIVED	1400	32	NO	no	inborn	no
pre	SURVIVED	1360	32	NO	no	inborn	no
pre	SURVIVED	1800	32	YES	yes	inborn	no
pre	SURVIVED	1650	32	NO	no	inborn	no
pre	SURVIVED	1350	32	YES	yes	inborn	no
pre	SURVIVED	1300	32	NO	no	inborn	no
pre	SURVIVED	1950	32	NO	no	inborn	no
pre	SURVIVED	1400	32	YES	no	inborn	no
pre	SURVIVED	1100	32	NO	no	inborn	no
pre	SURVIVED	1900	32	YES	no	referred	no
pre	SURVIVED	1200	32	NO	no	referred	no
pre	SURVIVED	1900	32	YES	no	referred	no
pre	SURVIVED	1800	32	NO	no	inborn	no
pre	SURVIVED	1650	32	NO	no	inborn	no
pre	SURVIVED	1750	32	NO	no	referred	no
pre	SURVIVED	1400	32	NO	no	referred	no
pre	SURVIVED	1400	32	NO	no	referred	no
pre	SURVIVED	1200	32	NO	no	inborn	no
pre	SURVIVED	1900	32	YES	no	referred	no
pre	SURVIVED	1500	32	NO	no	referred	no
pre	SURVIVED	1600	32	NO	no	referred	no
pre	SURVIVED	1500	32	NO	no	inborn	no
pre	SURVIVED	1800	32	NO	no	inborn	no
pre	SURVIVED	1930	32	YES	no	referred	no
pre	SURVIVED	1850	32	NO	no	referred	no
pre	SURVIVED	1900	32	YES	no	referred	no
pre	SURVIVED	1850	32	NO	no	inborn	no
pre	SURVIVED	1900	32	NO	no	referred	no
pre	SURVIVED	2300	32	NO	no	referred	no
pre	SURVIVED	1800	32	NO	no	referred	no
pre	SURVIVED	2300	32	NO	no	inborn	no
pre	SURVIVED	1700	32	NO	no	inborn	no
pre	SURVIVED	1900	32	YES	yes	referred	no	36
pre	SURVIVED	2100	32	YES	yes	referred	no	36
pre	SURVIVED	1800	32	NO	no	inborn	no	36.4
pre	SURVIVED	1500	32	NO	no	inborn	no	36.2
pre	SURVIVED	1700	32	NO	no	inborn	no	36.2
pre	SURVIVED	1700	32	YES	yes	inborn	no	36.2
pre	SURVIVED	1150	32	NO	no	referred	no	36.3
pre	SURVIVED	2150	32	NO	yes	inborn	no	34
pre	SURVIVED	1320	32	NO	no	inborn	no
pre	SURVIVED	1320	32	NO	no	inborn	no
pre	SURVIVED	1230	32	NO	no	inborn	no
pre	SURVIVED	1320	32	NO	no		no
pre	SURVIVED	1940	32	NO	no		no
pre	SURVIVED	2070	32	NO	no	inborn	no
pre	SURVIVED	1900	32	NO	no	inborn	no
pre	SURVIVED	1930	32	NO	no	inborn	no
pre	SURVIVED	1660	32	NO	no		no
pre	SURVIVED	1720	32	NO	no		no
post	SURVIVED	1900	32	NO	no	referred	no
post	SURVIVED	2400	32	NO	no	referred	no
post	SURVIVED	1200	32	NO	no	referred	no
post	SURVIVED	2200	32	NO	no	inborn	no
post	SURVIVED	1650	32	YES	yes	referred	no	36.2
post	SURVIVED	1920	32	YES	yes	inborn	no	37
post	SURVIVED	1500	32	NO	yes	referred	no	36.2
post	SURVIVED	1900	32	NO	yes	referred	no	36.4
post	SURVIVED	1700	32	YES	yes	inborn	no	36.5
post	SURVIVED	2110	32	NO	yes	referred	no	36.2
post	SURVIVED	2000	32	NO	yes	referred	no	36.5
post	SURVIVED	2670	32	NO	yes	referred	no	37.3
post	SURVIVED	1900	32	NO	yes	inborn	no	36.7
post	SURVIVED	1700	32	NO	yes	referred	no	36
post	SURVIVED	2000	32	YES	yes	referred	no	37.1
post	SURVIVED	1750	32	YES	yes	referred	no	37
post	SURVIVED	1900	32	NO	yes	inborn	no	36
post	SURVIVED	1800	32	YES	yes	referred	no	36.2
post	SURVIVED	2000	32	YES	yes	inborn	no	36.2
post	SURVIVED	1900	32	NO	yes	referred	no	39.9
post	SURVIVED	2100	32	NO	yes	referred	no	36.1
post	SURVIVED	1890	32	NO	yes	inborn	no	36.3
post	SURVIVED	2500	32	NO	yes	referred	no	36
post	SURVIVED	1900	32	NO	yes	referred	no	36.2
post	SURVIVED	2150	32	NO	yes	inborn	no	36.8
post	SURVIVED	1300	32	NO	yes	referred	no	36.1
post	SURVIVED	1950	32	NO	yes	inborn	no	36.5
post	SURVIVED	2300	32	NO	no	inborn	no	36.3
post	SURVIVED	2000	32	NO	no	referred	no	35.9
post	SURVIVED	1800	32	NO	no	referred	no	36.3
post	SURVIVED	2300	32	NO	no	referred	no
post	SURVIVED	2000	32	NO	no	referred	no	35.9
post	SURVIVED	2000	32	NO	no	referred	no	35.9
post	SURVIVED	1900	32	NO	no	referred	no	35.9
post	SURVIVED	1500	32	NO	no	referred	no	36.2
post	SURVIVED	1700	32	NO	no	referred	no	36.4
post	SURVIVED	1200	32	NO	no	referred	no
post	SURVIVED	1700	32	NO	no	referred	no	35.9
post	SURVIVED	2250	32	NO	no	referred	no
post	SURVIVED	1800	32	NO	no	referred	no
post	SURVIVED	2000	32	NO	no	referred	no	36.4
post	SURVIVED	1300	32	NO	no	referred	no	36.1
post	SURVIVED	1700	32	YES	yes	inborn	no	37.1
post	SURVIVED	1700	32	NO	no	referred	no	35.9
post	SURVIVED	3200	32	NO	no	referred	no
post	SURVIVED	2100	32	NO	no	referred	no
post	SURVIVED	2250	32	NO	no	inborn	no
post	SURVIVED	1300	32	NO	no	inborn	no	36
post	SURVIVED	1800	32	YES	yes	inborn	no	37
post	SURVIVED	1500	32	YES	yes	referred	no	36.2
post	SURVIVED	1750	32	YES	no	referred	no	37
post	SURVIVED	1850	32	YES	yes	inborn	no	36.3
post	SURVIVED	1800	32	YES	yes	inborn	no	36
post	SURVIVED	1100	32	YES	yes	referred	no	36.1
post	SURVIVED	1800	32	YES	yes	referred	no	36.6
post	SURVIVED	1800	32	YES	yes		no	36.7
post	SURVIVED	1500	32	YES	yes		no	36.2
post	SURVIVED	1900	32	YES	no		no	36.7
post	SURVIVED	1700	32	YES	yes		no	36.7
post	SURVIVED	1200	32	NO	no	inborn	no	36.4
post	SURVIVED	1450	32	NO	yes	referred	no	36.7
post	SURVIVED	1700	32	YES	yes	referred	no	37
post	SURVIVED	1950	32	NO	no		no	36.2
post	SURVIVED	1800	32	NO	no		no	37.5
post	SURVIVED		32	NO	yes	inborn	no	37
post	SURVIVED	1455	32	NO	no	inborn	no
post	SURVIVED	1565	32	NO	yes		no	35.2
post	SURVIVED	2500	32	NO	yes	inborn	no	36
post	SURVIVED	1405	32	NO	no	inborn	no
post	SURVIVED	3000	32	NO	yes	inborn	no	35
post	SURVIVED		32	NO	no	inborn	no
post	SURVIVED	2055	32	NO	yes	inborn	no	36.5
post	SURVIVED	1700	32	NO	no		no
post	SURVIVED	2400	32	NO	no		no
post	SURVIVED	2165	32	NO	no		no
post	SURVIVED	1960	32	NO	no		no
post	SURVIVED	2200	32	NO	yes		no	37.9
post	SURVIVED	2000	32	YES	yes	referred	no	36.7
post	SURVIVED	2200	32	YES	yes	referred	no	36.6
post	SURVIVED	1900	32	NO	yes	referred	no	36.7
post	SURVIVED	2100	32	YES	yes	referred	no	36.5
post	SURVIVED	1900	32	YES	yes	referred	no	36.5
post	SURVIVED	1900	32	YES	yes	referred	no	36.5
post	SURVIVED	1600	32	YES	yes	referred	no	36.9
post	SURVIVED	2000	32	YES	yes	inborn	no	36.5
post	SURVIVED	1600	32	YES	yes	referred	no	37.1
post	SURVIVED	2050	32	YES	yes	referred	no	36.7
post	SURVIVED	1700	32	YES	yes	inborn	no	36.9
post	SURVIVED	2300	32	YES	yes	referred	no	36.5
post	SURVIVED	1800	32	YES	yes	inborn	no	36.7
post	SURVIVED	1400	32	YES	yes	referred	no	36.9
post	SURVIVED	2300	32	NO	yes	referred	no	36.8
post	SURVIVED	2200	32	YES	yes	referred	no
post	SURVIVED	2100	32	NO	yes	referred	no	36.6
post	SURVIVED	1700	32	YES	yes	referred	no	36.4
post	SURVIVED	2200	32	YES	yes	inborn	no	36.8
post	SURVIVED	1300	32	YES	yes	referred	no	37.2
post	SURVIVED	1300	32	YES	yes	referred	no	36.9
post	SURVIVED	1900	32	NO	yes	referred	no	36.6
post	SURVIVED	1400	32	YES	yes	referred	no	36.8
post	SURVIVED	1200	32	YES	yes	referred	no	36.5
post	SURVIVED	2000	32	YES	yes	referred	no	37
post	SURVIVED	1700	32	YES	yes	inborn	no	36.6
post	SURVIVED	1800	32	YES	yes	inborn	no	37.3
post	SURVIVED	2000	32	NO	yes	referred	no	37.2
post	SURVIVED	2000	32	YES	yes	referred	no	36.7
post	SURVIVED	1300	32	YES	yes	inborn	no	37.1
post	SURVIVED	2000	32	YES	yes	referred	no	36.6
post	SURVIVED	1900	32	YES	yes	referred	no	37.3
post	SURVIVED	1700	32	YES	yes	referred	no	36.5
post	SURVIVED	2000	32	YES	yes	referred	no	37.3
post	SURVIVED	2000	32	YES	yes	referred	no	36.8
post	SURVIVED	2100	32	NO	yes	referred	no	36.6
post	SURVIVED	2050	32	YES	yes	referred	no	36.8
post	SURVIVED	2000	32	YES	yes	inborn	no	36.9
post	SURVIVED	2100	32	YES	yes	referred	no	36.7
[truncated: 1,497 more rows]

## Sheet: SURVDIED_FSB3970
IMPLEMENTATION	OUTCOME	BIRTH WEIGT	GA	ACS	NEOANTIB	INBORN VS OUTBORN	MATERNAL	INITIAL TEMPERATURE
pre	SURVIVED	2100	28	YES	yes	inborn	yes
pre	SURVIVED	1600	28	YES	yes	referred	yes	36
pre	SURVIVED	1000	28	NO	no	referred	yes
pre	SURVIVED	1400	28	NO	no	referred	yes
pre	SURVIVED	1450	28	NO	no	inborn	yes
pre	SURVIVED	1300	28	NO	no	referred	yes
pre	SURVIVED	1500	28	NO	no	referred	yes
pre	SURVIVED	1700	28	NO	no	referred	yes
pre	SURVIVED	1200	28	NO	no	inborn	yes
pre	SURVIVED	1200	28	YES	yes	inborn	yes	35
pre	SURVIVED	1200	28	YES	yes	referred	yes	36.5
pre	SURVIVED	1700	28	YES	yes	referred	yes	36
pre	DEATH	1200	28	YES	yes	inborn	yes	37
pre	DEATH	900	28	NO	no	referred	yes
pre	FSB	1100	28	NO	no	referred	yes
pre	FSB	1200	28	YES	no	inborn	yes
pre	FSB	1100	28	NO	no	referred	yes
pre	FSB	800	28	YES	no	referred	yes
pre	SURVIVED	1000	29	YES	no	inborn	yes
pre	SURVIVED	1500	29	YES	yes	inborn	yes
pre	SURVIVED	1100	29	YES	yes	referred	yes
pre	SURVIVED	1600	29	YES	yes	referred	yes	36.5
pre	SURVIVED	2200	29	YES	yes	referred	yes	36.2
pre	SURVIVED	1600	29	YES	yes	referred	yes	36.1
pre	SURVIVED	1370	29	YES	yes	inborn	yes	36.8
pre	SURVIVED	1900	29	YES	yes	inborn	yes	36.4
pre	DEATH	1800	29	NO	yes	referred	yes
pre	DEATH	1600	29	YES	yes	inborn	yes	35
pre	DEATH	1300	29	NO	no	referred	yes
pre	FSB	1100	29	YES	no	referred	yes
pre	SURVIVED	1600	30	YES	no	referred	yes
pre	SURVIVED	1500	30	YES	yes	inborn	yes
pre	SURVIVED	1650	30	YES	yes	inborn	yes	36.8
pre	SURVIVED	1600	30	YES	yes	inborn	yes	36
pre	SURVIVED	1200	30	YES	yes	inborn	yes	35
pre	SURVIVED	1500	30	YES	yes	inborn	yes	36.4
pre	SURVIVED	1850	30	YES	yes	referred	yes	35.5
pre	SURVIVED	1900	30	YES	yes	inborn	yes
pre	SURVIVED	1700	30	YES	yes	referred	yes	36
pre	SURVIVED	1800	30	YES	no	inborn	yes
pre	SURVIVED	1800	30	NO	no	referred	yes
pre	SURVIVED	1100	30	NO	no	referred	yes
pre	SURVIVED	1300	30	NO	no	referred	yes
pre	SURVIVED	1200	30	NO	no	referred	yes
pre	SURVIVED	1900	30	YES	no	referred	yes
pre	SURVIVED	1200	30	NO	no	referred	yes
pre	SURVIVED	1000	30	NO	no	inborn	yes
pre	SURVIVED	1800	30	NO	no	referred	yes
pre	SURVIVED	1200	30	NO	no	referred	yes
pre	SURVIVED	1500	30	NO	no	referred	yes
pre	SURVIVED	1800	30	NO	no	referred	yes
pre	SURVIVED	1150	30	YES	yes	inborn	yes	35.5
pre	SURVIVED	1200	30	YES	yes	inborn	yes	35.6
pre	SURVIVED	2000	30	YES	yes	referred	yes	36
pre	SURVIVED	1800	30	YES	yes	inborn	yes	36.9
pre	SURVIVED	1550	30	YES	yes	inborn	yes	36.2
pre	SURVIVED	1700	30	NO	yes	inborn	yes	36
pre	SURVIVED	1400	30	YES	no	inborn	yes	35.1
pre	SURVIVED	1300	30	NO	no	inborn	yes	36.8
pre	SURVIVED	1050	30	NO	yes	inborn	yes	33
pre	DEATH	1100	30	YES	yes	referred	yes
pre	DEATH	1700	30	YES	no	inborn	yes
pre	DEATH	1000	30	NO	no	inborn	yes
pre	FSB	1400	30	NO	no	referred	yes
pre	FSB	1200	30	NO	no	referred	yes
pre	FSB	950	30	YES	no	referred	yes
pre	FSB	1500	30	NO	no	referred	yes
pre	FSB	1400	30	NO	no	referred	yes
pre	FSB	1000	30	NO	no	referred	yes
pre	FSB	800	30	YES	no	referred	yes
pre	SURVIVED	3000	31	YES	yes	referred	yes
pre	SURVIVED	3500	31	YES	yes	referred	yes
pre	SURVIVED	1800	31	YES	yes	inborn	yes
pre	SURVIVED	1500	31	YES	yes	referred	yes	36.5
pre	SURVIVED	1700	31	YES	yes	inborn	yes	36.5
pre	SURVIVED	1500	31	YES	yes	referred	yes	35.9
pre	SURVIVED	1500	31	YES	yes	inborn	yes	35
pre	SURVIVED	1800	31	YES	yes	inborn	yes	35.5
pre	SURVIVED	1400	31	NO	no	inborn	yes
pre	SURVIVED	1900	31	YES	no	referred	yes
pre	SURVIVED	1500	31	NO	no	referred	yes
pre	SURVIVED	2700	31	YES	yes	referred	yes	36
pre	SURVIVED	1700	31	YES	yes	referred	yes	35.8
pre	SURVIVED	1900	31	YES	yes	inborn	yes	36
pre	SURVIVED	1500	31	YES	yes	inborn	yes	36.2
pre	SURVIVED	1370	31	YES	yes	inborn	yes	35
pre	DEATH	1350	31	YES	yes	inborn	yes	35
pre	SURVIVED	2300	32	YES	yes	inborn	yes	36.5
pre	SURVIVED	1600	32	YES	yes	referred	yes
pre	SURVIVED	1700	32	YES	yes	inborn	yes
pre	SURVIVED	2000	32	YES	yes	referred	yes
pre	SURVIVED	1900	32	YES	yes	inborn	yes
pre	SURVIVED	2200	32	YES	yes	inborn	yes	36
pre	SURVIVED	2450	32	YES	yes	referred	yes
pre	SURVIVED	1800	32	YES	yes	referred	yes	36.9
pre	SURVIVED	1800	32	YES	yes	referred	yes	35.5
pre	SURVIVED	2400	32	YES	yes	inborn	yes	35.8
pre	SURVIVED	2400	32	YES	yes	referred	yes	35.8
pre	SURVIVED	1600	32	NO	no	inborn	yes
pre	SURVIVED	1500	32	NO	no	inborn	yes
pre	SURVIVED	1700	32	NO	no	referred	yes
pre	SURVIVED	1100	32	NO	no	inborn	yes
pre	SURVIVED	2000	32	YES	no	referred	yes
pre	SURVIVED	2000	32	YES	yes	inborn	yes	36.2
pre	SURVIVED	1900	32	YES	yes	referred	yes	36
pre	SURVIVED	2000	32	YES	yes	referred	yes
pre	SURVIVED	1800	32	YES	yes	inborn	yes	36.2
pre	SURVIVED	1700	32	YES	yes	referred	yes	35.8
pre	SURVIVED	2500	32	YES	yes	inborn	yes	36
pre	SURVIVED	2200	32	YES	yes	inborn	yes	36
pre	SURVIVED	1900	32	YES	yes	inborn	yes	36
pre	SURVIVED	1300	32	YES	yes	inborn	yes	36.4
pre	SURVIVED	1800	32	YES	yes	inborn	yes	36.7
pre	SURVIVED	1400	32	YES	yes	inborn	yes	36
pre	SURVIVED	1400	32	YES	yes	inborn	yes	36.7
pre	SURVIVED	1950	32	YES	no	inborn	yes	36.4
pre	SURVIVED	1710	32	YES	yes	inborn	yes	36.1
pre	DEATH	2300	32	YES	yes	referred	yes
pre	DEATH	1750	32	YES	yes	referred	yes	35.8
pre	DEATH	1400	32	NO	no	referred	yes
pre	DEATH	1700	32	NO	yes	inborn	yes	35
pre	DEATH	1050	32	NO	yes	inborn	yes
pre	FSB	1200	32	NO	no	inborn	yes
pre	FSB	1800	32	NO	no	referred	yes
pre	SURVIVED	2200	33	YES	yes	referred	yes	36.7
pre	SURVIVED	1900	33	YES	yes	inborn	yes
pre	SURVIVED	2400	33	YES	yes	inborn	yes
pre	SURVIVED	1400	33	YES	yes	referred	yes
pre	SURVIVED	2300	33	YES	yes	inborn	yes	36.5
pre	SURVIVED	1850	33	YES	yes	inborn	yes	36
pre	SURVIVED	1900	33	YES	yes	inborn	yes	37
pre	SURVIVED	2200	33	YES	yes	referred	yes	37
pre	SURVIVED	2300	33	YES	yes	referred	yes	35.5
pre	SURVIVED	1470	33	NO	no	referred	yes
pre	SURVIVED	1300	33	NO	no	inborn	yes
pre	SURVIVED	1600	33	YES	yes	referred	yes	35.6
pre	SURVIVED	1800	33	YES	yes	inborn	yes	35.8
pre	SURVIVED	2100	33	YES	yes	inborn	yes	36
pre	SURVIVED	2000	33	YES	yes	referred	yes	36
pre	SURVIVED	1800	33	YES	yes	inborn	yes	36
pre	SURVIVED	2400	33	YES	yes	referred	yes	36
pre	SURVIVED	1890	33	NO	yes	inborn	yes	34.7
pre	SURVIVED	1790	33	NO	yes	inborn	yes	35.4
pre	DEATH	1100	33	NO	no	referred	yes
pre	DEATH	1800	33	NO	no	referred	yes
pre	FSB	1300	33	YES	no	referred	yes
pre	FSB	1200	33	NO	no	inborn	yes
pre	FSB	1600	33	NO	no	inborn	yes
pre	FSB	1500	33	NO	no	referred	yes
pre	SURVIVED	2200	34	YES	yes	inborn	yes
pre	SURVIVED	2400	34	YES	yes	referred	yes
pre	SURVIVED	2100	34	YES	yes	inborn	yes
pre	SURVIVED	2100	34	YES	yes	referred	yes
pre	SURVIVED	2000	34	YES	yes	inborn	yes
pre	SURVIVED	1600	34	YES	yes	referred	yes	36.4
pre	SURVIVED	1600	34	YES	yes	inborn	yes
pre	SURVIVED	1900	34	YES	yes	inborn	yes	36
pre	SURVIVED	2550	34	YES	yes	referred	yes	36
pre	SURVIVED	2000	34	YES	yes	inborn	yes	35.8
pre	SURVIVED	2100	34	YES	yes	referred	yes	36.5
pre	SURVIVED	2100	34	YES	yes	referred	yes	36
pre	SURVIVED	1300	34	NO	no	inborn	yes
pre	SURVIVED	1400	34	NO	no	inborn	yes
pre	SURVIVED	1700	34	NO	no	referred	yes
pre	SURVIVED	1900	34	YES	no	referred	yes
pre	SURVIVED	1980	34	YES	no	referred	yes
pre	SURVIVED	1800	34	NO	no	referred	yes
pre	SURVIVED	1900	34	YES	no	referred	yes
pre	SURVIVED	2450	34	YES	yes	inborn	yes	36
pre	SURVIVED	2100	34	YES	yes	inborn	yes	36.5
pre	SURVIVED	2000	34	YES	yes	inborn	yes	35.8
pre	SURVIVED	1900	34	YES	yes	referred	yes	36
pre	SURVIVED	1950	34	YES	yes	referred	yes	36
pre	SURVIVED	1500	34	YES	yes	referred	yes	36
pre	SURVIVED	1600	34	YES	yes	referred	yes
pre	SURVIVED	2200	34	YES	yes	inborn	yes	36
pre	SURVIVED	2200	34	YES	yes	referred	yes	36
pre	SURVIVED	2400	34	YES	yes	referred	yes	36
pre	SURVIVED	2100	34	YES	yes	referred	yes	36
pre	SURVIVED	1600	34	YES	yes	inborn	yes	36.2
pre	SURVIVED	1800	34	YES	yes	referred	yes	36.1
pre	SURVIVED	2000	34	YES	yes	referred	yes	35.9
pre	DEATH	1050	34	YES	yes	inborn	yes	35.4
pre	DEATH	1100	34	YES	yes	referred	yes	36
pre	DEATH	1400	34	NO	no	referred	yes
pre	FSB	1200	34	YES	no	referred	yes
pre	FSB	1200	34	YES	no	referred	yes
pre	FSB	1600	34	YES	no	referred	yes
pre	FSB	1300	34	NO	no	referred	yes
pre	FSB	1200	34	NO	no	referred	yes
pre	DEATH	800	24	NO	no	inborn	no
pre	SURVIVED	1500	26	NO	no	referred	no
pre	SURVIVED	1100	26	NO	no	inborn	no
pre	DEATH	1100	26	NO	no	inborn	no
pre	SURVIVED	1750	27	NO	no	inborn	no
pre	SURVIVED	1200	27	NO	no	inborn	no
pre	DEATH	1000	27	NO	no	inborn	no
pre	DEATH	950	27	NO	no	inborn	no
pre	FSB	800	27	NO	no	referred	no
pre	FSB	1100	27	NO	no	inborn	no
pre	SURVIVED	1100	28	NO	no	inborn	no
pre	SURVIVED	1150	28	NO	no	referred	no
pre	SURVIVED	1600	28	NO	no	referred	no
pre	SURVIVED	1600	28	NO	no	referred	no
pre	SURVIVED	1650	28	NO	no	inborn	no
pre	SURVIVED	1500	28	NO	no	inborn	no
pre	SURVIVED	1400	28	YES	yes	inborn	no
pre	SURVIVED	1550	28	NO	no	inborn	no
pre	SURVIVED	900	28	NO	no	inborn	no
pre	SURVIVED	1100	28	NO	no	inborn	no
pre	SURVIVED	1600	28	NO	no	referred	no
pre	SURVIVED	1700	28	NO	no	inborn	no
pre	SURVIVED	1850	28	NO	no	inborn	no
pre	SURVIVED	900	28	NO	no	inborn	no
pre	SURVIVED	1500	28	NO	no	inborn	no
pre	SURVIVED	1300	28	NO	no	referred	no
pre	SURVIVED	1700	28	NO	no	referred	no
pre	SURVIVED	1700	28	NO	no	inborn	no
pre	SURVIVED	1900	28	YES	no	referred	no
pre	SURVIVED	2250	28	NO	no	referred	no
pre	SURVIVED	1300	28	NO	no	inborn	no
pre	SURVIVED	3400	28	NO	no	referred	no
pre	SURVIVED	1200	28	YES	no	inborn	no
pre	SURVIVED	1850	28	YES	no	inborn	no
pre	SURVIVED	1300	28	NO	no	inborn	no	36.2
pre	SURVIVED	1250	28	NO	no	inborn	no	36.2
pre	SURVIVED	1450	28	NO	no	inborn	no
pre	SURVIVED	1800	28	NO	no	inborn	no	36.2
pre	SURVIVED	2100	28	NO	no	inborn	no
pre	SURVIVED	1820	28	NO	yes	inborn	no	36
pre	SURVIVED	1350	28	NO	no	inborn	no
pre	SURVIVED	1540	28	NO	no	inborn	no
pre	DEATH	1100	28	NO	no	inborn	no
pre	DEATH	1100	28	NO	no	inborn	no
pre	DEATH	1800	28	NO	no	referred	no
pre	DEATH	1000	28	NO	no	referred	no
pre	DEATH	1490	28	NO	no	referred	no
pre	DEATH	1200	28	NO	no	referred	no
pre	DEATH	800	28	YES	no	inborn	no
pre	DEATH	1300	28	NO	no	referred	no
pre	DEATH	1500	28	NO	no	referred	no
pre	DEATH	1300	28	NO	no	referred	no
pre	DEATH	1000	28	NO	no		no
pre	FSB	1000	28	NO	no	inborn	no
pre	FSB	1200	28	NO	no	inborn	no
pre	FSB	1400	28	NO	no	inborn	no
pre	FSB	1000	28	NO	no	referred	no
pre	FSB	1700	28	NO	no	referred	no
pre	FSB	1350	28	NO	no	referred	no
pre	FSB	950	28	YES	no	inborn	no
pre	FSB	1000	28	NO	no	inborn	no
pre	FSB	970	28	YES	no	inborn	no
pre	FSB	1700	28	NO	no	referred	no
pre	FSB	1800	28	NO	no	referred	no
pre	FSB	900	28	NO	no	referred	no
pre	FSB	1900	28	YES	no	inborn	no
pre	FSB	1100	28	YES	no	referred	no
pre	FSB	1050	28	YES	no	inborn	no
pre	FSB	1000	28	NO	no	inborn	no
pre	FSB	1400	28	NO	no	inborn	no
pre	FSB	1200	28	NO	no	inborn	no
pre	FSB	1500	28	NO	no	inborn	no
pre	FSB	1680	28	NO	no	referred	no
pre	FSB	1700	28	NO	no	referred	no
pre	FSB	1700	28	NO	no	inborn	no
pre	FSB		28	NO	no	inborn	no
pre	SURVIVED	1600	29	NO	no	referred	no
pre	SURVIVED	1400	29	NO	no	inborn	no
pre	SURVIVED	2200	29	NO	no	inborn	no
pre	SURVIVED	1500	29	NO	no	referred	no
pre	SURVIVED	1600	29	YES	no	inborn	no
pre	SURVIVED	1800	29	YES	no	inborn	no
pre	SURVIVED	1600	29	NO	no	inborn	no
pre	SURVIVED	1700	29	YES	yes	inborn	no
pre	SURVIVED	1500	29	NO	no	inborn	no
pre	SURVIVED	1800	29	NO	no	inborn	no
pre	SURVIVED	1700	29	NO	no	inborn	no
pre	SURVIVED	1300	29	NO	no	inborn	no
pre	SURVIVED	1300	29	NO	no	referred	no
pre	SURVIVED	1650	29	NO	no	referred	no
pre	SURVIVED	1500	29	NO	no	referred	no
pre	SURVIVED	1300	29	NO	no	referred	no
pre	SURVIVED	1600	29	NO	no	referred	no
pre	SURVIVED	1500	29	NO	no	referred	no
pre	SURVIVED	1800	29	NO	no	inborn	no
pre	SURVIVED	1700	29	NO	no	inborn	no
pre	SURVIVED	1600	29	NO	yes	inborn	no	35.9
pre	SURVIVED	1700	29	YES	no	inborn	no
pre	SURVIVED	1900	29	NO	no	inborn	no	36.2
pre	SURVIVED	1800	29	NO	yes	inborn	no	36.2
pre	SURVIVED	1300	29	YES	yes	inborn	no	36.6
pre	SURVIVED	1600	29	YES	yes	inborn	no	36.2
pre	SURVIVED	1600	29	NO	no	inborn	no
pre	SURVIVED	1500	29	NO	no	inborn	no	36.2
pre	SURVIVED	1400	29	YES	yes	inborn	no	36.2
pre	SURVIVED	1800	29	YES	no	inborn	no	36
pre	SURVIVED	1620	29	NO	no		no
pre	SURVIVED	1670	29	NO	no	inborn	no
pre	DEATH	1700	29	NO	no	referred	no
pre	DEATH	1100	29	NO	no	inborn	no
pre	DEATH	1450	29	NO	no	referred	no
pre	DEATH	1120	29	NO	no	inborn	no
pre	DEATH	1400	29	NO	no	referred	no
pre	DEATH	1700	29	NO	no	referred	no
pre	DEATH	1200	29	NO	no	referred	no
pre	DEATH	1440	29	NO	no	inborn	no
pre	DEATH	1510	29	NO	no	inborn	no
pre	FSB	1400	29	NO	no	inborn	no
pre	FSB	1100	29	YES	no	inborn	no
pre	FSB	1300	29	NO	no	referred	no
pre	FSB	1200	29	NO	no	inborn	no	36.2
pre	FSB	1400	29	NO	no	inborn	no
pre	FSB	1600	29	NO	no	inborn	no
pre	FSB	1100	29	NO	no	inborn	no
pre	SURVIVED	1400	30	NO	no	referred	no
pre	SURVIVED	1350	30	NO	no	referred	no
pre	SURVIVED	3200	30	NO	no	referred	no
pre	SURVIVED	2300	30	NO	no	inborn	no
pre	SURVIVED	1400	30	NO	no	referred	no
pre	SURVIVED	2900	30	NO	no	inborn	no
pre	SURVIVED	1300	30	NO	no	inborn	no
pre	SURVIVED	1800	30	NO	no	inborn	no
pre	SURVIVED	1800	30	NO	no	inborn	no
pre	SURVIVED	1500	30	YES	no	inborn	no
pre	SURVIVED	1600	30	NO	no	inborn	no
pre	SURVIVED	1800	30	NO	no	inborn	no
pre	SURVIVED	1900	30	NO	no	inborn	no
pre	SURVIVED	1800	30	NO	no	inborn	no
pre	SURVIVED	1300	30	NO	no	inborn	no
pre	SURVIVED	1800	30	NO	yes	inborn	no
pre	SURVIVED	1800	30	NO	no	inborn	no
pre	SURVIVED	1250	30	NO	no	inborn	no
pre	SURVIVED	1000	30	NO	no	inborn	no
pre	SURVIVED	1800	30	NO	no	referred	no
pre	SURVIVED	2400	30	YES	yes	referred	no
pre	SURVIVED	1200	30	NO	no	inborn	no
pre	SURVIVED	1900	30	YES	no	inborn	no
pre	SURVIVED	1950	30	YES	no	referred	no
pre	SURVIVED	1900	30	YES	no	inborn	no
pre	SURVIVED	1800	30	NO	no	inborn	no
pre	SURVIVED	1450	30	NO	no	referred	no
pre	SURVIVED	1300	30	NO	no	referred	no
pre	SURVIVED	1600	30	NO	no	referred	no
pre	SURVIVED	1500	30	NO	no	referred	no
pre	SURVIVED	1900	30	YES	no	inborn	no
pre	SURVIVED	1900	30	YES	no	inborn	no
pre	SURVIVED	1300	30	NO	no	referred	no
pre	SURVIVED	1700	30	NO	no	referred	no
pre	SURVIVED	1750	30	YES	no	referred	no
pre	SURVIVED	2000	30	NO	no	inborn	no
pre	SURVIVED	1600	30	YES	no	inborn	no	36.2
pre	SURVIVED	1450	30	YES	no	inborn	no
pre	SURVIVED	1800	30	YES	yes	inborn	no	36.2
pre	SURVIVED	1400	30	NO	no	referred	no	36.8
pre	SURVIVED	1400	30	NO	no	inborn	no	36.2
pre	SURVIVED	1500	30	NO	no	inborn	no
pre	SURVIVED	1200	30	NO	no	inborn	no	36.2
pre	SURVIVED	1300	30	NO	no	inborn	no	36
pre	SURVIVED	1600	30	NO	no	inborn	no	36
pre	SURVIVED	1570	30	YES	yes	inborn	no	36.7
pre	SURVIVED	1200	30	YES	yes	inborn	no	36.2
pre	SURVIVED	1300	30	NO	yes	inborn	no	36
pre	SURVIVED	1300	30	NO	no	inborn	no
pre	SURVIVED	1700	30	YES	yes	inborn	no	36.3
pre	SURVIVED	1300	30	NO	no	inborn	no	35.8
pre	SURVIVED	1600	30	NO	no	inborn	no	36.2
pre	SURVIVED	1850	30	NO	no	inborn	no
pre	SURVIVED	1950	30	NO	no	inborn	no
pre	SURVIVED	1850	30	NO	no	inborn	no
pre	SURVIVED	1900	30	NO	no	inborn	no
pre	SURVIVED	1950	30	NO	no	inborn	no
pre	SURVIVED	1600	30	NO	no	inborn	no
pre	SURVIVED	3000	30	NO	no	inborn	no	36.6
pre	SURVIVED	1600	30	YES	yes	inborn	no	36.2
pre	SURVIVED	1750	30	NO	no	inborn	no	36.2
pre	SURVIVED	1800	30	YES	no	inborn	no	36.2
pre	SURVIVED	1800	30	YES	yes	inborn	no	36.2
pre	SURVIVED	1400	30	NO	no	inborn	no	36.2
pre	SURVIVED	1620	30	NO	no	inborn	no
pre	SURVIVED	1630	30	NO	yes	inborn	no
pre	SURVIVED	2400	30	NO	no	inborn	no
pre	DEATH	650	30	NO	no	referred	no
pre	DEATH	1800	30	NO	no	inborn	no
pre	DEATH	1400	30	NO	no	inborn	no
pre	DEATH	1800	30	NO	no	inborn	no
pre	DEATH	1100	30	NO	no	inborn	no
pre	DEATH	900	30	NO	no	referred	no
pre	DEATH	900	30	NO	no	inborn	no
pre	DEATH	1500	30	NO	no	inborn	no
pre	DEATH	1500	30	NO	no	inborn	no
pre	DEATH	1550	30	NO	no	inborn	no
pre	DEATH	1100	30	YES	no	inborn	no	36.2
pre	DEATH	1200	30	NO	no	inborn	no	36.3
pre	DEATH	1000	30	YES	yes	referred	no
pre	FSB	1800	30	NO	no	inborn	no
pre	FSB	1250	30	NO	no	inborn	no
pre	FSB	1800	30	NO	no	inborn	no
pre	FSB	1400	30	NO	no	inborn	no
pre	FSB	1900	30	YES	no	referred	no
pre	FSB	1300	30	NO	no	referred	no
pre	FSB	1000	30	NO	no	inborn	no
pre	FSB	1550	30	NO	no	inborn	no
pre	FSB	1700	30	NO	no	inborn	no
pre	FSB	1700	30	NO	no	referred	no
pre	FSB	1800	30	NO	no	referred	no
pre	FSB	1100	30	NO	no	referred	no	36.6
pre	FSB	1500	30	NO	no	inborn	no
pre	FSB	1650	30	NO	no	inborn	no
pre	FSB	1200	30	NO	no	inborn	no	36
pre	SURVIVED	3150	31	NO	no	referred	no
pre	SURVIVED	1300	31	NO	no	inborn	no
pre	SURVIVED	1400	31	NO	no	inborn	no
pre	SURVIVED	1800	31	NO	no	referred	no
pre	SURVIVED	2300	31	NO	no	referred	no
pre	SURVIVED	1650	31	NO	no	referred	no
pre	SURVIVED	1400	31	NO	no	referred	no
pre	SURVIVED	1900	31	YES	no	referred	no
pre	SURVIVED	1650	31	NO	no	referred	no
pre	SURVIVED	1600	31	NO	no	referred	no
pre	SURVIVED	1700	31	NO	no	referred	no
pre	SURVIVED	1900	31	NO	no	referred	no
pre	SURVIVED	2300	31	NO	no	inborn	no
pre	SURVIVED	1200	31	YES	yes	inborn	no	36.3
pre	SURVIVED	1600	31	YES	yes	inborn	no	36.2
pre	SURVIVED	1700	31	NO	no	inborn	no	36.6
pre	SURVIVED	2080	31	NO	no	inborn	no
pre	SURVIVED	1630	31	NO	no	inborn	no
pre	SURVIVED	1400	31	NO	no	inborn	no
pre	SURVIVED	2000	31	NO	no		no
pre	DEATH	1800	31	NO	no	inborn	no
pre	DEATH	1500	31	NO	no	referred	no
pre	DEATH	1100	31	NO	no	inborn	no
pre	DEATH	1800	31	NO	yes	referred	no	35.9
pre	DEATH	1700	31	NO	no	inborn	no
pre	DEATH	1050	31	NO	no	inborn	no
pre	FSB	1800	31	NO	no	referred	no
pre	FSB	2200	31	NO	no	referred	no
pre	FSB	1900	31	NO	no	inborn	no
pre	FSB	1550	31	NO	no	inborn	no
pre	FSB	1200	31	NO	no	inborn	no
pre	FSB	1700	31	NO	no	referred	no
pre	FSB	1650	31	NO	no	inborn	no
pre	FSB	1580	31	NO	no	referred	no
pre	FSB	2900	31	NO	no	inborn	no
pre	SURVIVED	2200	32	NO	no	referred	no
pre	SURVIVED	1700	32	NO	no	referred	no
pre	SURVIVED	2000	32	NO	no	referred	no
pre	SURVIVED	1600	32	YES	yes	inborn	no
pre	SURVIVED	1800	32	NO	no	inborn	no
pre	SURVIVED	1150	32	NO	no	inborn	no
pre	SURVIVED	3000	32	NO	no	inborn	no
pre	SURVIVED	2900	32	NO	no	inborn	no
pre	SURVIVED	1800	32	NO	no	inborn	no
pre	SURVIVED	1500	32	YES	yes	inborn	no
pre	SURVIVED	1800	32	NO	no	inborn	no
pre	SURVIVED	1950	32	NO	no	inborn	no
pre	SURVIVED	1680	32	NO	no	inborn	no
pre	SURVIVED	1400	32	NO	no	inborn	no
pre	SURVIVED	1360	32	NO	no	inborn	no
pre	SURVIVED	1800	32	YES	yes	inborn	no
pre	SURVIVED	1650	32	NO	no	inborn	no
pre	SURVIVED	1350	32	YES	yes	inborn	no
pre	SURVIVED	1300	32	NO	no	inborn	no
pre	SURVIVED	1950	32	NO	no	inborn	no
pre	SURVIVED	1400	32	YES	no	inborn	no
pre	SURVIVED	1100	32	NO	no	inborn	no
pre	SURVIVED	1900	32	YES	no	referred	no
pre	SURVIVED	1200	32	NO	no	referred	no
pre	SURVIVED	1900	32	YES	no	referred	no
pre	SURVIVED	1800	32	NO	no	inborn	no
pre	SURVIVED	1650	32	NO	no	inborn	no
pre	SURVIVED	1750	32	NO	no	referred	no
pre	SURVIVED	1400	32	NO	no	referred	no
pre	SURVIVED	1400	32	NO	no	referred	no
pre	SURVIVED	1200	32	NO	no	inborn	no
pre	SURVIVED	1900	32	YES	no	referred	no
pre	SURVIVED	1500	32	NO	no	referred	no
pre	SURVIVED	1600	32	NO	no	referred	no
pre	SURVIVED	1500	32	NO	no	inborn	no
pre	SURVIVED	1800	32	NO	no	inborn	no
pre	SURVIVED	1930	32	YES	no	referred	no
pre	SURVIVED	1850	32	NO	no	referred	no
pre	SURVIVED	1900	32	YES	no	referred	no
pre	SURVIVED	1850	32	NO	no	inborn	no
pre	SURVIVED	1900	32	NO	no	referred	no
pre	SURVIVED	2300	32	NO	no	referred	no
pre	SURVIVED	1800	32	NO	no	referred	no
pre	SURVIVED	2300	32	NO	no	inborn	no
pre	SURVIVED	1700	32	NO	no	inborn	no
pre	SURVIVED	1900	32	YES	yes	referred	no	36
pre	SURVIVED	2100	32	YES	yes	referred	no	36
pre	SURVIVED	1800	32	NO	no	inborn	no	36.4
pre	SURVIVED	1500	32	NO	no	inborn	no	36.2
pre	SURVIVED	1700	32	NO	no	inborn	no	36.2
pre	SURVIVED	1700	32	YES	yes	inborn	no	36.2
pre	SURVIVED	1150	32	NO	no	referred	no	36.3
pre	SURVIVED	2150	32	NO	yes	inborn	no	34
pre	SURVIVED	1320	32	NO	no	inborn	no
pre	SURVIVED	1320	32	NO	no	inborn	no
pre	SURVIVED	1230	32	NO	no	inborn	no
pre	SURVIVED	1320	32	NO	no		no
pre	SURVIVED	1940	32	NO	no		no
pre	SURVIVED	2070	32	NO	no	inborn	no
pre	SURVIVED	1900	32	NO	no	inborn	no
pre	SURVIVED	1930	32	NO	no	inborn	no
pre	SURVIVED	1660	32	NO	no		no
pre	SURVIVED	1720	32	NO	no		no
pre	DEATH	1200	32	NO	no	inborn	no
pre	DEATH	1100	32	NO	no	referred	no
pre	DEATH	1200	32	YES	no	referred	no
pre	DEATH	1500	32	NO	no	referred	no
pre	DEATH	1400	32	NO	no	referred	no
pre	DEATH	1450	32	NO	no	referred	no
pre	DEATH	1000	32	NO	no	referred	no
pre	DEATH	1950	32	YES	no	referred	no
pre	DEATH	1000	32	NO	no	inborn	no	34.1
pre	DEATH	1000	32	NO	no	inborn	no	35.4
pre	DEATH	1000	32	NO	no	inborn	no	34
pre	DEATH	950	32	NO	no	referred	no
pre	DEATH	1350	32	NO	yes	inborn	no	34
pre	DEATH	1740	32	NO	no		no
pre	DEATH	1670	32	NO	no		no
pre	DEATH	2190	32	NO	yes	inborn	no	34
pre	FSB	2000	32	NO	no	referred	no
pre	FSB	2000	32	NO	no	referred	no
pre	FSB	1000	32	YES	no	referred	no
pre	FSB	2250	32	YES	no	referred	no
pre	FSB	800	32	YES	no	referred	no
pre	FSB	1900	32	YES	no	referred	no
pre	FSB	1400	32	NO	no	referred	no
pre	FSB	1800	32	NO	no	inborn	no
pre	FSB	1500	32	NO	no	referred	no
pre	FSB	1500	32	NO	no	referred	no
pre	FSB	1200	32	NO	no	referred	no
pre	FSB	1800	32	NO	no	referred	no
pre	FSB	1300	32	NO	no	inborn	no	36.2
pre	FSB	2500	32	NO	no	inborn	no
pre	FSB	2110	32	NO	no	referred	no
pre	SURVIVED	2500	33	YES	no	referred	no
pre	SURVIVED	1250	33	NO	no	inborn	no
pre	SURVIVED	2000	33	NO	no	referred	no
pre	SURVIVED	2000	33	NO	no	inborn	no
pre	SURVIVED	2100	33	NO	no	referred	no
pre	SURVIVED	2350	33	NO	no	inborn	no
pre	SURVIVED	2400	33	NO	no	inborn	no
pre	SURVIVED	2500	33	NO	no	inborn	no
pre	SURVIVED	2800	33	NO	no	inborn	no
pre	SURVIVED	1700	33	NO	no	referred	no
pre	SURVIVED	1750	33	NO	no	inborn	no
pre	SURVIVED	1950	33	YES	no	inborn	no
pre	SURVIVED	1760	33	NO	no	inborn	no
pre	SURVIVED	1700	33	NO	no	inborn	no
pre	SURVIVED	1500	33	NO	no	referred	no
pre	SURVIVED	1900	33	YES	no	referred	no
pre	SURVIVED	1750	33	NO	no	inborn	no
pre	SURVIVED	1600	33	NO	no	referred	no
pre	SURVIVED	1700	33	NO	no	referred	no
pre	SURVIVED	1980	33	YES	no	referred	no
pre	SURVIVED	1830	33	NO	no	referred	no
pre	SURVIVED	2150	33	NO	no	inborn	no
pre	SURVIVED	1800	33	NO	no	inborn	no
pre	SURVIVED	1700	33	NO	no	inborn	no
pre	SURVIVED	2400	33	NO	no	inborn	no
pre	SURVIVED	1750	33	YES	yes	referred	no	35.4
pre	SURVIVED	1900	33	YES	yes	inborn	no	36.2
pre	SURVIVED	1900	33	NO	yes	inborn	no	36
pre	SURVIVED	1890	33	NO	yes	inborn	no
pre	SURVIVED	2150	33	NO	yes	inborn	no
pre	SURVIVED	1990	33	NO	no	inborn	no
pre	SURVIVED	1910	33	NO	no		no
pre	SURVIVED	1700	33	NO	no	inborn	no
pre	SURVIVED	1890	33	NO	no	inborn	no
pre	SURVIVED	1630	33	NO	no		no
pre	DEATH	1400	33	NO	no	inborn	no
pre	DEATH	1450	33	NO	no	referred	no
pre	DEATH	1500	33	NO	no	referred	no
pre	DEATH	1200	33	NO	no	inborn	no
pre	DEATH	1800	33	NO	no	referred	no
pre	DEATH	2550	33	NO	yes	inborn	no	34.5
pre	FSB	2200	33	NO	no	inborn	no
pre	FSB	1910	33	YES	no	referred	no
pre	FSB	1300	33	NO	no	referred	no
pre	FSB	2200	33	NO	no	referred	no
pre	FSB	2500	33	NO	no	inborn	no
pre	SURVIVED	1100	34	NO	no	inborn	no
pre	SURVIVED	1700	34	NO	no	inborn	no
pre	SURVIVED	1850	34	NO	no	inborn	no
pre	SURVIVED	2850	34	NO	no	inborn	no
pre	SURVIVED	1850	34	NO	no	referred	no
pre	SURVIVED	2000	34	NO	no	referred	no
pre	SURVIVED	1289	34	NO	no	referred	no
pre	SURVIVED	2000	34	NO	no	inborn	no
pre	SURVIVED	2000	34	NO	no	inborn	no
pre	SURVIVED	2000	34	NO	no	inborn	no
pre	SURVIVED	2600	34	NO	no	inborn	no
pre	SURVIVED	1200	34	NO	no	inborn	no
pre	SURVIVED	1200	34	NO	no	referred	no
pre	SURVIVED	1800	34	NO	no	referred	no
pre	SURVIVED	1600	34	NO	no	referred	no
pre	SURVIVED	1800	34	NO	no	inborn	no
pre	SURVIVED	1900	34	YES	no	referred	no
pre	SURVIVED	1700	34	NO	no	referred	no
pre	SURVIVED	1800	34	NO	no	referred	no
pre	SURVIVED	1800	34	NO	no	referred	no
pre	SURVIVED	1530	34	NO	no	referred	no
pre	SURVIVED	1500	34	NO	no	referred	no
pre	SURVIVED	1950	34	YES	no	referred	no
pre	SURVIVED	1800	34	NO	no	referred	no
pre	SURVIVED	1500	34	NO	no	referred	no
pre	SURVIVED	2800	34	YES	yes	inborn	no
pre	SURVIVED	1400	34	NO	no	inborn	no
pre	SURVIVED	1200	34	NO	no	inborn	no
pre	SURVIVED	1850	34	NO	no	inborn	no
pre	SURVIVED	1800	34	NO	no	referred	no
pre	SURVIVED	2200	34	NO	no	inborn	no
pre	SURVIVED	2000	34	NO	no	inborn	no
pre	SURVIVED	1800	34	NO	no	referred	no
pre	SURVIVED	2000	34	NO	no	referred	no
pre	SURVIVED	2700	34	NO	no	referred	no
pre	SURVIVED	1800	34	NO	no	referred	no
pre	SURVIVED	2400	34	NO	no	referred	no
pre	SURVIVED	1800	34	NO	no	referred	no
pre	SURVIVED	1800	34	NO	no	referred	no	35.7
pre	SURVIVED	1300	34	YES	no	inborn	no	36.2
pre	SURVIVED	1500	34	YES	no	inborn	no	36.2
pre	SURVIVED	1030	34	NO	yes	inborn	no
pre	SURVIVED	2370	34	NO	no	inborn	no
pre	SURVIVED	2300	34	NO	no	inborn	no
pre	SURVIVED	2260	34	NO	no	inborn	no
pre	SURVIVED	1950	34	NO	no	inborn	no
pre	SURVIVED	1800	34	NO	no	inborn	no
pre	SURVIVED	1640	34	NO	no	inborn	no
pre	SURVIVED	2100	34	NO	no	inborn	no
pre	SURVIVED	2140	34	NO	no	inborn	no
pre	SURVIVED	1640	34	NO	no	inborn	no
pre	SURVIVED	1780	34	NO	no	inborn	no
pre	DEATH	2300	34	NO	no	referred	no
pre	DEATH	2200	34	NO	no	referred	no
pre	DEATH	900	34	NO	no	inborn	no
pre	DEATH	1200	34	YES	no	inborn	no	36.3
pre	DEATH	2200	34	NO	yes	inborn	no	35
pre	DEATH	1000	34	NO	no	inborn	no
pre	FSB	2400	34	NO	no	inborn	no
pre	FSB	1700	34	NO	no	referred	no
pre	FSB	1700	34	NO	no	referred	no
pre	FSB	1600	34	NO	no	referred	no
pre	FSB	2200	34	NO	no	inborn	no
pre	FSB	1800	34	NO	no	inborn	no
post	SURVIVED	1000	25	NO	yes	referred	yes	35
post	SURVIVED	1600	26	NO	yes	referred	yes	35.8
post	DEATH	700	26	YES	yes	inborn	yes	35.6
post	SURVIVED	1200	27	YES	yes	inborn	yes	36.2
post	SURVIVED	1700	27	NO	yes	referred	yes	39
post	SURVIVED	1200	27	YES	yes	inborn	yes	35.6
post	DEATH	1200	27	NO	no	inborn	yes	36
post	SURVIVED	860	28	YES	yes	referred	yes	36.2
post	SURVIVED	950	28	YES	yes	referred	yes	36.4
post	SURVIVED	900	28	NO	yes	referred	yes	35.8
post	SURVIVED	850	28	YES	yes	inborn	yes	35.9
post	SURVIVED	900	28	NO	yes	referred	yes	36.1
post	SURVIVED	850	28	YES	yes	referred	yes	37.2
post	SURVIVED	740	28	YES	yes	inborn	yes	37.3
post	SURVIVED	900	28	YES	yes	referred	yes	36.6
post	SURVIVED	1200	28	NO	yes	inborn	yes	35.7
post	SURVIVED	1300	28	YES	yes	inborn	yes	37
post	SURVIVED	1150	28	YES	yes	referred	yes	36
post	SURVIVED	1030	28	YES	yes	inborn	yes	36.6
post	SURVIVED	1100	28	YES	yes	referred	yes	36.1
post	SURVIVED	1300	28	YES	yes	inborn	yes	36.4
post	SURVIVED	1400	28	YES	yes	inborn	yes	36.3
post	SURVIVED	1000	28	YES	yes	inborn	yes	36.9
post	SURVIVED	1200	28	YES	yes	referred	yes	36.8
post	SURVIVED	2400	28	YES	yes	referred	yes	36.6
post	SURVIVED	1700	28	NO	no	referred	yes	36
post	SURVIVED	900	28	YES	yes	inborn	yes	36.8
post	SURVIVED	450	28	YES	yes	inborn	yes	36.8
post	SURVIVED	400	28	YES	yes	inborn	yes	36.8
post	SURVIVED	1600	28	YES	yes	referred	yes	36.6
post	SURVIVED	1100	28	YES	yes	inborn	yes	36.8
post	SURVIVED	2080	28	NO	no	referred	yes	35.7
post	SURVIVED	1500	28	YES	yes	referred	yes	36.5
post	SURVIVED	1100	28	NO	no	referred	yes
post	SURVIVED	1200	28	YES	yes	referred	yes	36.6
post	SURVIVED	1600	28	NO	no	referred	yes	36
post	SURVIVED	1200	28	YES	yes	referred	yes	36.6
post	SURVIVED	700	28	YES	yes	inborn	yes	36.8
post	SURVIVED	1700	28	YES	yes	inborn	yes	36.8
post	SURVIVED	1300	28	YES	yes	inborn	yes	36.9
post	SURVIVED	1000	28	NO	no	referred	yes	36.4
post	SURVIVED	1600	28	YES	yes	inborn	yes	36.8
post	SURVIVED	1400	28	YES	yes	inborn	yes	36.9
post	SURVIVED	2050	28	YES	yes	inborn	yes	36.8
post	SURVIVED	1100	28	YES	yes	inborn	yes	36.8
post	SURVIVED	1700	28	YES	yes	inborn	yes	36.9
post	SURVIVED	850	28	YES	yes	inborn	yes	36.8
post	SURVIVED	1250	28	YES	yes	inborn	yes	36.9
post	SURVIVED	1700	28	YES	yes	referred	yes	36.5
post	SURVIVED	1000	28	YES	yes	referred	yes	37.3
post	SURVIVED	2000	28	YES	yes	inborn	yes	36.8
post	SURVIVED	1000	28	YES	yes	inborn	yes	36.8
post	SURVIVED	1700	28	YES	yes	referred	yes	36
post	SURVIVED	1900	28	YES	yes	referred	yes	35.5
post	SURVIVED	2200	28	YES	yes	referred	yes	35.4
post	SURVIVED	1000	28	YES	yes	referred	yes	36
post	SURVIVED	1150	28	YES	yes	referred	yes	36
post	SURVIVED	1300	28	YES	no	inborn	yes	35.7
post	SURVIVED	1350	28	YES	yes		yes	35.9
post	SURVIVED	1000	28	YES	yes		yes	36
post	SURVIVED		28	NO	no	inborn	yes
post	SURVIVED	1540	28	YES	yes		yes	36.7
post	SURVIVED	1420	28	YES	yes		yes	36
post	SURVIVED	1500	28	YES	yes	referred	yes	35.9
post	SURVIVED	2000	28	YES	yes	referred	yes
post	SURVIVED	1400	28	YES	yes	referred	yes
post	SURVIVED	1920	28	YES	yes	inborn	yes	36.9
post	SURVIVED	950	28	YES	yes	inborn	yes	36.4
post	SURVIVED	1000	28	YES	yes	inborn	yes	37.3
post	SURVIVED	1000	28	YES	yes	referred	yes	36.8
post	SURVIVED	1700	28	YES	yes	inborn	yes
post	SURVIVED	1900	28	YES	yes	inborn	yes	36.8
post	SURVIVED	1000	28	YES	yes	referred	yes	37.3
post	SURVIVED	1600	28	YES	yes	referred	yes	37
post	SURVIVED	1000	28	YES	yes	inborn	yes	36.9
post	SURVIVED	1000	28	YES	yes	inborn	yes
post	SURVIVED	1400	28	YES	yes	referred	yes	36.9
post	SURVIVED	1300	28	YES	yes	inborn	yes
post	SURVIVED	900	28	YES	yes	inborn	yes	36.3
post	SURVIVED	1300	28	YES	yes	referred	yes
post	SURVIVED	1000	28	YES	yes	inborn	yes	37.3
post	SURVIVED	1200	28	YES	yes	referred	yes
post	SURVIVED	1000	28	YES	yes	inborn	yes	36.9
post	SURVIVED	500	28	YES	yes	inborn	yes	36.3
post	SURVIVED	1700	28	YES	yes	inborn	yes
post	SURVIVED	1600	28	YES	yes	inborn	yes
post	SURVIVED	1800	28	YES	yes	inborn	yes	37.4
post	SURVIVED	2200	28	YES	yes	inborn	yes	36.9
post	SURVIVED	1300	28	YES	yes	inborn	yes
post	SURVIVED	1800	28	YES	yes	inborn	yes
post	SURVIVED	1700	28	NO	yes	referred	yes
post	SURVIVED	650	28	YES	yes	inborn	yes	36.7
post	SURVIVED	2000	28	YES	yes	referred	yes
post	SURVIVED	1250	28	YES	yes	referred	yes
post	SURVIVED	1400	28	YES	yes	referred	yes
post	SURVIVED	1000	28	YES	yes	inborn	yes
post	SURVIVED	1000	28	YES	yes	inborn	yes
post	SURVIVED	1200	28	YES	yes	referred	yes
post	SURVIVED	2100	28	YES	yes	referred	yes
post	SURVIVED	1200	28	YES	yes	inborn	yes
post	SURVIVED	1200	28	YES	yes	inborn	yes
post	SURVIVED	700	28	YES	yes	inborn	yes
post	SURVIVED	800	28	YES	yes	inborn	yes	36.7
post	SURVIVED	1900	28	YES	yes	referred	yes
post	SURVIVED	1050	28	YES	yes	inborn	yes	37.4
post	SURVIVED	1100	28	NO	yes	referred	yes	35.7
post	SURVIVED	1000	28	NO	yes	referred	yes	35.6
post	SURVIVED	1000	28	NO	yes	referred	yes	35.6
post	SURVIVED	1300	28	YES	yes	inborn	yes	36
post	SURVIVED	1300	28	YES	yes	referred	yes	35.5
post	SURVIVED	1400	28	YES	no	inborn	yes	35.8
post	SURVIVED	1500	28	YES	yes	inborn	yes	36
post	SURVIVED	1300	28	YES	no	inborn	yes	36
post	SURVIVED	1350	28	YES	yes	inborn	yes	37
post	SURVIVED	1250	28	YES	yes	inborn	yes	37
post	SURVIVED	1700	28	YES	yes	inborn	yes	36.2
post	SURVIVED	1600	28	YES	yes	inborn	yes	36
post	DEATH	910	28	YES	yes	referred	yes	36.2
post	DEATH	950	28	NO	yes	referred	yes	36.9
post	DEATH	700	28	NO	yes	referred	yes	37.2
post	DEATH	810	28	NO	yes		yes	36.2
post	DEATH	950	28	YES	no		yes	37.1
post	DEATH	1000	28	YES	yes	referred	yes	36.8
post	DEATH	800	28	YES	yes		yes	36
post	DEATH	900	28	YES	yes		yes	36.5
post	DEATH	900	28	YES	no	referred	yes	35.9
post	DEATH	700	28	YES	no	inborn	yes	37.1
post	DEATH	2100	28	YES	yes	referred	yes	35
post	DEATH	1400	28	YES	yes	inborn	yes	36.8
post	DEATH	750	28	YES	yes	inborn	yes	36.6
post	DEATH	950	28	YES	yes	inborn	yes	36.2
post	DEATH	1150	28	YES	yes	inborn	yes	36.3
post	DEATH	1350	28	YES	yes	inborn	yes	36.5
post	DEATH	1100	28	YES	yes	inborn	yes	36.7
post	DEATH	1030	28	YES	yes	referred	yes	36.7
post	DEATH	600	28	NO	no	referred	yes	35.7
post	DEATH	800	28	YES	yes	referred	yes	36.6
post	DEATH	1100	28	NO	no	referred	yes	35.7
post	DEATH	900	28	NO	no	referred	yes	36.3
post	DEATH	1000	28	NO	no	referred	yes	36.3
post	DEATH	1200	28	YES	yes	inborn	yes	37.3
post	DEATH	1500	28	YES	yes	inborn	yes	36.9
post	DEATH	1100	28	YES	yes	referred	yes	36.6
post	DEATH	700	28	YES	yes	referred	yes	36.5
post	DEATH	1200	28	YES	yes	inborn	yes	36.9
post	DEATH	750	28	YES	yes	inborn	yes	36.8
post	DEATH	800	28	NO	no	referred	yes	36.4
post	DEATH	950	28	NO	yes	inborn	yes	35
post	DEATH	1000	28	NO	yes	inborn	yes	35.5
post	DEATH	2200	28	NO	yes	inborn	yes	35
post	DEATH	1770	28	NO	yes		yes	34
post	DEATH	900	28	YES	yes	referred	yes	36.6
post	DEATH	1000	28	YES	yes	inborn	yes	36.9
post	DEATH	1200	28	YES	yes	referred	yes	35.9
post	DEATH	1300	28	YES	yes	inborn	yes	36.6
post	DEATH	750	28	YES	yes	inborn	yes	36.8
post	DEATH	1100	28	YES	yes	inborn	yes	36.9
post	DEATH	1000	28	YES	yes	inborn	yes	36.8
post	DEATH	1000	28	YES	yes	inborn	yes	36.6
post	DEATH	1000	28	YES	no	inborn	yes	36.9
post	DEATH	1500	28	NO	no	referred	yes
post	DEATH	600	28	YES	no	inborn	yes	36.4
post	DEATH	1000	28	YES	no	referred	yes
post	DEATH	1000	28	YES	no	referred	yes
post	DEATH	1300	28	YES	yes	inborn	yes	36.7
post	FSB	720	28	NO	no		yes
post	FSB	1400	28	NO	no	referred	yes
post	FSB	1000	28	NO	no	referred	yes
post	FSB	800	28	NO	no	referred	yes
post	FSB	1000	28	NO	no	referred	yes
post	FSB	600	28	YES	yes	inborn	yes	36.5
post	FSB	1200	28	NO	no	referred	yes
post	FSB	1300	28	NO	no	referred	yes
post	FSB	1600	28	NO	no	referred	yes
post	FSB	850	28	NO	no	referred	yes
post	FSB	1000	28	NO	no	referred	yes
post	FSB	1900	28	YES	yes	inborn	yes	36.5
post	FSB	2060	28	YES	yes	inborn	yes	36.5
post	FSB	800	28	YES	yes	inborn	yes	36.5
post	FSB	750	28	YES	yes	inborn	yes	36.5
post	FSB	700	28	YES	yes	inborn	yes	36.5
post	FSB	2000	28	NO	no	referred	yes
post	FSB	1050	28	YES	yes	inborn	yes	36.5
post	FSB	1900	28	NO	no	referred	yes
post	FSB	1400	28	YES	no	inborn	yes
post	FSB	1450	28	YES	no	inborn	yes
post	FSB	1700	28	NO	no	referred	yes
post	FSB	1200	28	YES	yes	inborn	yes
post	FSB	1200	28	NO	no	referred	yes
post	FSB	1800	28	NO	no	referred	yes
post	SURVIVED	900	29	NO	yes		yes	35.9
post	SURVIVED	1200	29	YES	yes		yes	35.9
post	SURVIVED	1260	29	YES	yes		yes	36.6
post	SURVIVED	1900	29	YES	yes	inborn	yes	36.1
post	SURVIVED	1200	29	YES	yes	inborn	yes	36
post	SURVIVED	1100	29	YES	yes	inborn	yes	36
post	SURVIVED	2000	29	YES	yes	inborn	yes	36.2
post	SURVIVED	1625	29	YES	yes		yes	37.2
post	SURVIVED	1600	29	YES	yes	inborn	yes	36.3
post	SURVIVED	1710	29	YES	yes	inborn	yes	36.4
post	SURVIVED	1500	29	YES	yes	referred	yes	36.5
post	SURVIVED	1800	29	YES	yes	referred	yes	36.6
post	SURVIVED	1000	29	YES	yes	inborn	yes	36.3
post	SURVIVED	1700	29	YES	yes	inborn	yes	36.7
post	SURVIVED	1350	29	YES	yes	referred	yes	36.6
post	SURVIVED	2150	29	NO	yes	referred	yes	36.2
post	SURVIVED	1400	29	YES	yes	referred	yes	36.5
post	SURVIVED	1820	29	YES	yes	referred	yes	36.4
post	SURVIVED	1300	29	YES	yes	inborn	yes	37
post	SURVIVED	1800	29	YES	yes	inborn	yes	37
post	SURVIVED	1400	29	YES	yes	referred	yes	36.5
post	SURVIVED	1500	29	YES	yes	referred	yes	36.6
post	SURVIVED	1200	29	YES	yes	inborn	yes	36.9
post	SURVIVED	1050	29	YES	yes	inborn	yes	36.8
post	SURVIVED	2300	29	YES	yes	inborn	yes	36.8
post	SURVIVED	2060	29	NO	no	referred	yes	36
post	SURVIVED	1600	29	NO	no	referred	yes	36
post	SURVIVED	1400	29	YES	yes	referred	yes	36.8
post	SURVIVED	2200	29	YES	yes	inborn	yes	36.8
post	SURVIVED	1200	29	YES	yes	referred	yes	36.5
post	SURVIVED	1900	29	YES	yes	referred	yes	36.8
post	SURVIVED	900	29	YES	yes	inborn	yes	36.8
post	SURVIVED	1400	29	YES	yes	inborn	yes	36.8
post	SURVIVED	2200	29	NO	no	referred	yes
post	SURVIVED	1200	29	YES	yes	referred	yes	36.5
post	SURVIVED	1350	29	NO	no	referred	yes	36
post	SURVIVED	1200	29	YES	yes	inborn	yes	36.9
post	SURVIVED	1200	29	NO	no	referred	yes	36.4
post	SURVIVED	1400	29	NO	no	referred	yes	36
post	SURVIVED	1200	29	YES	yes	referred	yes	36.6
post	SURVIVED	2100	29	YES	yes	referred	yes	36.7
post	SURVIVED	1500	29	YES	yes	inborn	yes	35.8
post	SURVIVED	1600	29	YES	yes	referred	yes	36
post	SURVIVED	1500	29	YES	yes	referred	yes	36.2
post	SURVIVED	1900	29	YES	yes	inborn	yes	35.8
post	SURVIVED	1400	29	NO	yes	referred	yes	35.7
post	SURVIVED	1200	29	NO	yes	inborn	yes	35.5
post	SURVIVED	1100	29	YES	yes	inborn	yes	36
post	SURVIVED	1250	29	YES	yes	referred	yes	35.8
post	SURVIVED	1200	29	NO	yes	inborn	yes	35
post	SURVIVED	2000	29	YES	no	inborn	yes	35.1
post	SURVIVED	1800	29	YES	no	referred	yes	36.2
post	SURVIVED	1800	29	YES	yes		yes	36.5
post	SURVIVED	1400	29	YES	yes		yes	36
post	SURVIVED	2200	29	NO	yes	referred	yes
post	SURVIVED	1200	29	YES	yes	referred	yes	36.8
post	SURVIVED	2500	29	NO	yes	referred	yes
post	SURVIVED	1300	29	YES	yes	inborn	yes	36.8
post	SURVIVED	1400	29	YES	yes	inborn	yes	36.6
post	SURVIVED	2200	29	YES	yes	inborn	yes	37.3
post	SURVIVED	1030	29	YES	yes	inborn	yes
post	SURVIVED	1600	29	YES	yes	referred	yes
post	SURVIVED	1100	29	YES	yes	inborn	yes
post	SURVIVED	1300	29	YES	yes	inborn	yes
post	SURVIVED	1550	29	YES	yes	referred	yes	37.4
post	SURVIVED	2100	29	YES	yes	inborn	yes
post	SURVIVED	1900	29	YES	yes	referred	yes
post	SURVIVED	1000	29	YES	yes	referred	yes	36.5
post	SURVIVED	1300	29	YES	yes	referred	yes	36.8
post	SURVIVED	2200	29	YES	yes	inborn	yes	36.6
post	SURVIVED	1700	29	YES	yes	referred	yes	36.8
post	SURVIVED	1900	29	YES	yes	inborn	yes	36.4
post	SURVIVED	2100	29	YES	yes	inborn	yes	37
post	SURVIVED	1880	29	YES	yes	referred	yes	37.1
post	SURVIVED	1800	29	YES	yes	inborn	yes
post	SURVIVED	1650	29	NO	yes	referred	yes
post	SURVIVED	900	29	YES	yes	inborn	yes
post	SURVIVED	1200	29	YES	yes	inborn	yes
post	SURVIVED	2400	29	YES	yes	inborn	yes
post	SURVIVED	1000	29	YES	yes	referred	yes
post	SURVIVED	1500	29	YES	yes	referred	yes
post	SURVIVED	990	29	YES	yes	inborn	yes
post	SURVIVED	1000	29	YES	yes	inborn	yes	36.8
post	SURVIVED	1500	29	YES	yes	inborn	yes	36
post	SURVIVED	1700	29	YES	yes	inborn	yes	36
post	SURVIVED	1900	29	YES	yes	inborn	yes	35.9
post	SURVIVED	1400	29	YES	yes	inborn	yes	36
post	SURVIVED	1150	29	YES	yes	inborn	yes	35.8
post	SURVIVED	1600	29	YES	yes	inborn	yes	36.2
post	SURVIVED	1700	29	YES	yes	inborn	yes	36
post	SURVIVED	1400	29	YES	yes	inborn	yes	36.6
post	SURVIVED	1850	29	YES	yes	inborn	yes	36.2
post	SURVIVED	1500	29	YES	yes	inborn	yes	36.3
post	SURVIVED	1600	29	YES	yes	inborn	yes	36.8
post	SURVIVED	1300	29	YES	yes	inborn	yes	36
post	SURVIVED	1650	29	YES	yes	inborn	yes	36
post	SURVIVED	1700	29	YES	yes	inborn	yes	36
post	SURVIVED	1300	29	YES	yes	inborn	yes	37
post	SURVIVED	1950	29	YES	yes	referred	yes	36
post	DEATH	900	29	NO	yes		yes	37.1
post	DEATH	1400	29	YES	yes	inborn	yes	36.6
post	DEATH	1200	29	NO	yes	referred	yes	36.3
post	DEATH	1600	29	YES	yes	inborn	yes	36.1
post	DEATH	1380	29	YES	yes	inborn	yes	36.8
post	DEATH	1200	29	YES	yes	inborn	yes	37
post	DEATH	1400	29	YES	yes	inborn	yes	36.9
post	DEATH	1100	29	YES	no	referred	yes
post	DEATH	1100	29	YES	yes	referred	yes	36.9
post	DEATH	1200	29	NO	no	referred	yes
post	DEATH	900	29	YES	yes	referred	yes
post	DEATH	1050	29	YES	yes	referred	yes
post	DEATH	1850	29	YES	yes	inborn	yes	35.8
post	DEATH	1900	29	YES	yes	inborn	yes	36.7
post	DEATH	1000	29	YES	yes	inborn	yes
post	FSB	1000	29	YES	yes	referred	yes	36.5
post	FSB	1900	29	YES	yes	referred	yes	36.5
post	FSB	1000	29	NO	no	referred	yes
post	FSB	1400	29	NO	no	referred	yes
post	FSB	2100	29	NO	no	inborn	yes
post	FSB	900	29	YES	yes	inborn	yes	36.5
post	FSB	1200	29	YES	yes	inborn	yes	36.5
post	FSB	1400	29	YES	yes	inborn	yes
post	FSB	1200	29	NO	no	inborn	yes
post	SURVIVED	1300	30	NO	yes		yes	37.2
post	SURVIVED	1000	30	YES	yes		yes	36.5
post	SURVIVED	900	30	YES	yes	referred	yes	37.3
post	SURVIVED	1000	30	NO	yes		yes	36.6
post	SURVIVED	1350	30	NO	yes		yes	35.9
post	SURVIVED	1800	30	NO	yes	referred	yes	36.2
post	SURVIVED	1300	30	YES	yes	referred	yes	37.2
post	SURVIVED	1000	30	YES	yes	referred	yes	36
post	SURVIVED	1000	30	YES	yes	referred	yes	35.6
post	SURVIVED	1000	30	YES	yes	referred	yes	36.2
post	SURVIVED	1300	30	YES	yes	referred	yes	37.2
post	SURVIVED	1200	30	YES	yes	inborn	yes	36.9
post	SURVIVED	1500	30	NO	yes	referred	yes	36
post	SURVIVED	1600	30	YES	yes	inborn	yes	36.2
post	SURVIVED	1700	30	NO	yes	referred	yes	35.8
post	SURVIVED	2400	30	YES	yes	referred	yes	36
post	SURVIVED	1000	30	YES	yes	referred	yes	36
post	SURVIVED	2150	30	NO	yes	inborn	yes
post	SURVIVED	1450	30	YES	yes	referred	yes	36.6
post	SURVIVED	1350	30	YES	yes	referred	yes	37.1
post	SURVIVED	1300	30	YES	yes	inborn	yes	37.2
post	SURVIVED	2230	30	NO	yes	referred	yes	35.9
post	SURVIVED	1440	30	YES	yes	inborn	yes	37.3
post	SURVIVED	2000	30	YES	yes	referred	yes	36.7
post	SURVIVED	2100	30	YES	yes	referred	yes	36.9
post	SURVIVED	1400	30	NO	yes	referred	yes	36
post	SURVIVED	1300	30	NO	yes	referred	yes	36.2
post	SURVIVED	1900	30	YES	yes	inborn	yes	36.9
post	SURVIVED	1300	30	NO	yes	referred	yes	35.7
post	SURVIVED	1650	30	YES	yes	inborn	yes	35.9
post	SURVIVED	1700	30	YES	yes		yes	37
post	SURVIVED	1800	30	YES	yes	inborn	yes	36.6
post	SURVIVED	2000	30	YES	yes	referred	yes	36.5
post	SURVIVED	1500	30	YES	yes	referred	yes	37
post	SURVIVED	1500	30	YES	yes	referred	yes	37
post	SURVIVED	1700	30	YES	yes	inborn	yes	36.9
post	SURVIVED	1500	30	YES	yes	inborn	yes	37
post	SURVIVED	1500	30	YES	yes	referred	yes	36.2
post	SURVIVED	2000	30	YES	yes	referred	yes	37.3
post	SURVIVED	2130	30	YES	yes	referred	yes	36.6
post	SURVIVED	1200	30	YES	yes	referred	yes	36.4
post	SURVIVED	1800	30	NO	yes	referred	yes	36.3
post	SURVIVED	1600	30	YES	yes	inborn	yes	37.2
post	SURVIVED	1700	30	YES	yes	inborn	yes	36.4
post	SURVIVED	1740	30	NO	yes	referred	yes	36.1
post	SURVIVED	1500	30	YES	yes	referred	yes	36.2
post	SURVIVED	1700	30	YES	yes	inborn	yes	36.6
post	SURVIVED	1600	30	YES	yes	inborn	yes	36.8
post	SURVIVED	1400	30	YES	yes	referred	yes	36.1
post	SURVIVED	1750	30	YES	yes	referred	yes	37.1
post	SURVIVED	2300	30	YES	yes	referred	yes	36.3
post	SURVIVED	1300	30	YES	yes	referred	yes	36
post	SURVIVED	1250	30	YES	yes	referred	yes	36.6
post	SURVIVED	1300	30	YES	yes	referred	yes	36.6
post	SURVIVED	1230	30	YES	yes	referred	yes	36.6
post	SURVIVED	1840	30	YES	yes	referred	yes	36.6
post	SURVIVED	2000	30	NO	no	referred	yes
post	SURVIVED	1350	30	YES	yes	referred	yes	36.7
post	SURVIVED	1180	30	YES	yes	inborn	yes	37.1
post	SURVIVED	1800	30	YES	yes	inborn	yes	37
post	SURVIVED	1100	30	NO	no	referred	yes	36.1
post	SURVIVED	1600	30	NO	no	referred	yes	36
post	SURVIVED	1600	30	NO	no	referred	yes	36.1
post	SURVIVED	2060	30	NO	no	referred	yes	36
post	SURVIVED	2200	30	YES	yes	referred	yes	36.5
post	SURVIVED	1300	30	YES	yes	inborn	yes	37.1
post	SURVIVED	2050	30	YES	yes	inborn	yes	37.1
post	SURVIVED	2100	30	YES	yes	inborn	yes	37.1
post	SURVIVED	1600	30	YES	yes	inborn	yes	37
post	SURVIVED	2300	30	YES	yes	inborn	yes	36.9
post	SURVIVED	1900	30	YES	yes	referred	yes	36.6
post	SURVIVED	1900	30	NO	no	referred	yes	36.1
post	SURVIVED	1800	30	YES	yes	inborn	yes	36.9
post	SURVIVED	2050	30	NO	no	referred	yes	36
post	SURVIVED	2200	30	NO	no	referred	yes	35.9
post	SURVIVED	2000	30	NO	no	referred	yes	36.4
post	SURVIVED	1400	30	YES	yes	referred	yes	36.5
post	SURVIVED	1700	30	NO	no	referred	yes	35.9
post	SURVIVED	1400	30	NO	no	referred	yes	36.1
post	SURVIVED	1600	30	YES	yes	inborn	yes	37.6
post	SURVIVED	2200	30	NO	no	referred	yes	36.1
post	SURVIVED	1800	30	NO	no	referred	yes	35.8
post	SURVIVED	1500	30	YES	yes	referred	yes	36.6
post	SURVIVED	1300	30	YES	yes	inborn	yes	36.8
post	SURVIVED	1300	30	YES	yes	inborn	yes	37.2
post	SURVIVED	1400	30	YES	yes	referred	yes	36.8
post	SURVIVED	2000	30	YES	yes	inborn	yes	36.9
post	SURVIVED	1400	30	YES	yes	inborn	yes	36.8
post	SURVIVED	900	30	YES	yes	referred	yes	36.6
post	SURVIVED	1400	30	YES	yes	inborn	yes	36.9
post	SURVIVED	2200	30	YES	yes	inborn	yes	36.8
post	SURVIVED	1300	30	YES	yes	inborn	yes	37.2
post	SURVIVED	2100	30	YES	yes	inborn	yes	36.9
post	SURVIVED	1400	30	YES	yes	referred	yes	36.7
post	SURVIVED	1400	30	YES	yes	inborn	yes	37.1
post	SURVIVED	1500	30	YES	yes	inborn	yes	36.9
post	SURVIVED	1600	30	YES	yes	inborn	yes	36.9
post	SURVIVED	1500	30	YES	yes	inborn	yes	36.9
post	SURVIVED	1200	30	YES	yes	referred	yes	36.7
post	SURVIVED	2100	30	YES	yes	inborn	yes	36.9
post	SURVIVED	1900	30	YES	yes	referred	yes	36.5
post	SURVIVED	1400	30	YES	yes	referred	yes	36.7
post	SURVIVED	1500	30	YES	yes	referred	yes	36.6
post	SURVIVED	1200	30	YES	yes	inborn	yes	37.2
post	SURVIVED	1950	30	YES	yes	inborn	yes	35.9
post	SURVIVED	2000	30	NO	yes	referred	yes	35.8
post	SURVIVED	1850	30	NO	yes	inborn	yes	35
post	SURVIVED	1600	30	YES	yes	inborn	yes	35.9
post	SURVIVED	2400	30	YES	yes	referred	yes	36.2
post	SURVIVED	1550	30	YES	yes	inborn	yes	36
post	SURVIVED	1100	30	YES	yes	inborn	yes	36.1
post	SURVIVED	1500	30	YES	yes	inborn	yes	36
post	SURVIVED	1300	30	YES	yes	referred	yes	35.8
post	SURVIVED	1450	30	YES	yes	inborn	yes	35.9
post	SURVIVED	2100	30	NO	yes	referred	yes	35.5
post	SURVIVED	1500	30	NO	yes	referred	yes	35.4
post	SURVIVED	1200	30	YES	yes	inborn	yes	36
post	SURVIVED	1900	30	NO	yes	inborn	yes	35.5
post	SURVIVED	2000	30	NO	yes	inborn	yes	35.9
post	SURVIVED	1850	30	YES	yes	referred	yes	36.4
post	SURVIVED	1800	30	YES	no	inborn	yes	36.4
post	SURVIVED	1300	30	YES	yes	inborn	yes	36.8
post	SURVIVED	1700	30	YES	yes	inborn	yes	36.4
post	SURVIVED	1950	30	YES	yes		yes	36.4
post	SURVIVED	1950	30	YES	yes		yes	36.1
post	SURVIVED	2350	30	NO	no	inborn	yes	35.9
post	SURVIVED	1800	30	YES	yes		yes	36.5
post	SURVIVED		30	NO	yes		yes	34
post	SURVIVED	1370	30	NO	yes		yes	36.4
post	SURVIVED	1700	30	YES	yes	inborn	yes	36.8
post	SURVIVED	900	30	YES	yes	inborn	yes
post	SURVIVED	750	30	YES	yes	referred	yes
post	SURVIVED	1400	30	YES	no	inborn	yes
post	SURVIVED	1700	30	YES	yes	inborn	yes	37.2
post	SURVIVED	1200	30	YES	yes	referred	yes
post	SURVIVED	1920	30	YES	yes	inborn	yes
post	SURVIVED	1900	30	YES	yes	inborn	yes	36.6
post	SURVIVED	1250	30	YES	yes	inborn	yes
post	SURVIVED	1650	30	YES	yes	inborn	yes
post	SURVIVED	1300	30	YES	yes	inborn	yes	36.8
post	SURVIVED	1200	30	YES	yes	inborn	yes
post	SURVIVED	1800	30	YES	yes	inborn	yes
post	SURVIVED	1400	30	YES	yes	inborn	yes
post	SURVIVED	1500	30	NO	yes	referred	yes	36.9
post	SURVIVED	1800	30	YES	yes	inborn	yes	36.6
post	SURVIVED	2400	30	YES	yes	inborn	yes
post	SURVIVED	2000	30	YES	yes	inborn	yes	36.8
post	SURVIVED	1450	30	YES	yes	referred	yes
post	SURVIVED	1500	30	YES	yes	inborn	yes
post	SURVIVED	1800	30	YES	yes	inborn	yes	36.6
post	SURVIVED	1250	30	YES	yes	inborn	yes	36.5
post	SURVIVED	2200	30	YES	yes	referred	yes	36.8
post	SURVIVED	1600	30	YES	yes	inborn	yes
post	SURVIVED	1800	30	YES	yes	inborn	yes
post	SURVIVED	2000	30	YES	yes	referred	yes	37
post	SURVIVED	1200	30	YES	yes	inborn	yes
post	SURVIVED	1800	30	YES	yes	referred	yes	36.6
post	SURVIVED	1900	30	NO	yes	referred	yes
post	SURVIVED	1100	30	YES	yes	referred	yes	36.4
post	SURVIVED	1100	30	YES	yes	referred	yes	36.6
post	SURVIVED	1400	30	YES	yes	inborn	yes
post	SURVIVED	1700	30	YES	yes	referred	yes	36.2
post	SURVIVED	1400	30	YES	yes	referred	yes	36.6
post	SURVIVED	1800	30	YES	yes	inborn	yes
post	SURVIVED	1700	30	YES	yes	inborn	yes
post	SURVIVED	1500	30	YES	yes	inborn	yes	37.3
post	SURVIVED	800	30	NO	yes	referred	yes	36.9
post	SURVIVED	2000	30	YES	yes	inborn	yes
post	SURVIVED	1400	30	YES	yes	inborn	yes	36.6
post	SURVIVED	1650	30	YES	yes	inborn	yes	37.3
post	SURVIVED	1400	30	YES	yes	referred	yes
post	SURVIVED	1400	30	YES	yes	referred	yes
post	SURVIVED	1300	30	YES	yes	referred	yes
post	SURVIVED	2100	30	YES	yes	referred	yes
post	SURVIVED	1450	30	YES	yes	inborn	yes
post	SURVIVED	1700	30	YES	yes	inborn	yes
post	SURVIVED	1400	30	YES	yes	inborn	yes
post	SURVIVED	800	30	YES	yes	inborn	yes	36.5
post	SURVIVED	900	30	YES	yes	inborn	yes
post	SURVIVED	1600	30	YES	yes	inborn	yes
post	SURVIVED	1400	30	NO	yes	referred	yes
post	SURVIVED	2400	30	YES	yes	referred	yes
post	SURVIVED	1800	30	YES	yes	inborn	yes
post	SURVIVED	2000	30	YES	yes	inborn	yes
post	SURVIVED	1950	30	YES	yes	referred	yes
post	SURVIVED	1800	30	YES	yes	referred	yes
post	SURVIVED	1200	30	YES	yes	inborn	yes
post	SURVIVED	1800	30	YES	yes	referred	yes
post	SURVIVED	2050	30	YES	yes	referred	yes
post	SURVIVED	1400	30	YES	yes	inborn	yes
post	SURVIVED	1400	30	YES	yes	inborn	yes	35.9
post	SURVIVED	1700	30	YES	yes	inborn	yes	35.8
post	SURVIVED	2100	30	NO	yes	referred	yes	35.9
post	SURVIVED	1400	30	YES	yes	inborn	yes	36
post	SURVIVED	1400	30	YES	yes	referred	yes	35.8
post	SURVIVED	1900	30	NO	yes	referred	yes	36
post	SURVIVED	1800	30	YES	yes	inborn	yes	35.5
post	SURVIVED	1500	30	YES	yes	inborn	yes	36
post	SURVIVED	1650	30	YES	yes	inborn	yes	36.2
post	SURVIVED	1300	30	YES	no	inborn	yes	36
post	SURVIVED	1200	30	YES	yes	inborn	yes	37
post	SURVIVED	1800	30	YES	yes	inborn	yes	36
post	SURVIVED	1900	30	YES	yes	inborn	yes	36.8
post	SURVIVED	3400	30	YES	yes	inborn	yes	36
post	SURVIVED	3300	30	YES	yes	inborn	yes	36.2
post	SURVIVED	1900	30	YES	yes	inborn	yes	36
post	SURVIVED	1900	30	YES	yes	inborn	yes	36
post	SURVIVED	1700	30	YES	yes	inborn	yes	36
post	SURVIVED	1900	30	YES	yes	inborn	yes	35.4
post	SURVIVED	1900	30	YES	yes	inborn	yes	37
post	SURVIVED	1300	30	YES	yes	inborn	yes	36
post	DEATH	1000	30	NO	no	referred	yes	37.1
post	DEATH	1650	30	NO	yes	referred	yes	36.2
post	DEATH	1000	30	YES	yes		yes	36.2
post	DEATH	1000	30	YES	yes	referred	yes	36.9
post	DEATH	1000	30	YES	yes		yes	36.2
post	DEATH	1000	30	NO	no		yes	35.9
post	DEATH	1000	30	NO	no	referred	yes	37.1
post	DEATH	1500	30	NO	yes	inborn	yes	35.7
post	DEATH	1200	30	YES	yes	referred	yes	35
post	DEATH	1300	30	YES	yes	inborn	yes	36
post	DEATH	1370	30	YES	yes	inborn	yes	37.1
post	DEATH	1600	30	NO	yes	referred	yes	35.9
post	DEATH	1100	30	NO	yes		yes	35.9
post	DEATH	1230	30	YES	yes	inborn	yes	36.8
post	DEATH	1300	30	YES	yes		yes	36.8
post	DEATH	2300	30	YES	yes	inborn	yes	37.9
post	DEATH	1000	30	NO	yes	referred	yes	36
post	DEATH	1000	30	YES	yes	referred	yes	36.7
post	DEATH	1750	30	YES	yes	referred	yes	36.4
post	DEATH	1300	30	YES	yes	referred	yes	36
post	DEATH	700	30	NO	no	referred	yes	35.8
post	DEATH	1300	30	NO	no	referred	yes	36
post	DEATH	1300	30	YES	yes	referred	yes	36.5
post	DEATH	1700	30	YES	yes	referred	yes	36.6
post	DEATH	1950	30	YES	yes	referred	yes	37.3
post	DEATH	1100	30	NO	no	referred	yes	36.1
post	DEATH	1400	30	NO	no	referred	yes	36
post	DEATH	1050	30	YES	yes	inborn	yes	36.8
post	DEATH	1800	30	YES	yes	referred	yes	36.6
post	DEATH	1400	30	YES	yes	referred	yes	36.7
post	DEATH	1400	30	YES	yes	referred	yes	36.7
post	DEATH	1800	30	YES	yes	referred	yes	36.8
post	DEATH	1800	30	YES	yes	referred	yes	36.8
post	DEATH	1000	30	NO	no	inborn	yes	36.3
post	DEATH	1100	30	NO	no	referred	yes	36
post	DEATH	1900	30	YES	yes	referred	yes	35.9
post	DEATH	1600	30	NO	yes	referred	yes	35.5
post	DEATH	2000	30	YES	yes	referred	yes	35.8
post	DEATH	1450	30	NO	no	referred	yes	35.8
post	DEATH	1800	30	YES	yes		yes	36
post	DEATH	1800	30	YES	yes		yes	36.5
post	DEATH	1700	30	YES	yes	inborn	yes	33
post	DEATH	1000	30	NO	no	referred	yes	35.8
post	DEATH	1700	30	YES	no	referred	yes	37
post	DEATH	1500	30	YES	no	inborn	yes	37.1
post	DEATH	1000	30	YES	yes	referred	yes
post	DEATH	800	30	YES	yes	referred	yes	36.4
post	DEATH	1270	30	YES	yes	referred	yes
post	DEATH	1300	30	YES	yes	inborn	yes
post	DEATH	800	30	YES	no	inborn	yes
post	DEATH	1150	30	YES	yes	inborn	yes	35.9
post	DEATH	900	30	NO	yes	referred	yes	35.5
post	DEATH	1300	30	YES	yes	inborn	yes	35.9
post	FSB	700	30	NO	no	referred	yes
post	FSB	1200	30	YES	yes	inborn	yes	36.5
post	FSB	1700	30	NO	no	referred	yes
post	FSB	800	30	NO	no	inborn	yes
post	FSB	1100	30	NO	no	referred	yes
post	FSB	2200	30	YES	yes	inborn	yes	36.5
post	FSB	1300	30	YES	yes	inborn	yes	36.5
post	FSB	600	30	NO	no	inborn	yes
post	FSB	700	30	NO	no	inborn	yes
post	FSB	1000	30	YES	yes	inborn	yes	36.5
post	FSB	1400	30	YES	yes	inborn	yes	36.5
post	FSB	1200	30	YES	yes	referred	yes	36.5
post	FSB	1100	30	YES	yes	inborn	yes	36.5
post	FSB	1500	30	NO	no	referred	yes
post	FSB	1500	30	YES	yes	referred	yes
post	FSB	900	30	YES	no	referred	yes
post	FSB	2060	30	YES	no	inborn	yes
post	FSB	2100	30	YES	no	referred	yes
post	FSB	1000	30	YES	no	referred	yes
post	SURVIVED	1300	31	YES	yes		yes	37.1
post	SURVIVED	1150	31	YES	yes	inborn	yes	37.2
post	SURVIVED	1300	31	YES	yes	referred	yes	36.5
post	SURVIVED	1300	31	NO	yes	referred	yes	36.2
post	SURVIVED	1200	31	NO	yes		yes	36.9
post	SURVIVED	1000	31	YES	yes	referred	yes	37.3
post	SURVIVED	1000	31	NO	yes	referred	yes	36.2
post	SURVIVED	1200	31	YES	yes		yes	36.2
post	SURVIVED	1200	31	YES	yes		yes	37.2
post	SURVIVED	1150	31	YES	yes	referred	yes	36.2
post	SURVIVED	1150	31	NO	yes		yes	35.8
post	SURVIVED	1700	31	NO	no	inborn	yes	36
post	SURVIVED	1450	31	YES	yes	inborn	yes	35.9
post	SURVIVED	1500	31	YES	yes	inborn	yes	35.9
post	SURVIVED	1500	31	YES	yes	referred	yes	36
post	SURVIVED	1500	31	YES	yes	inborn	yes	36
post	SURVIVED	1200	31	NO	yes	referred	yes	35.8
post	SURVIVED	2100	31	YES	yes	referred	yes	36
post	SURVIVED	1650	31	YES	yes	referred	yes	35.9
post	SURVIVED	1200	31	YES	yes	inborn	yes	36
post	SURVIVED	1150	31	NO	yes	referred	yes	35.6
post	SURVIVED	2050	31	YES	yes	inborn	yes	36.6
post	SURVIVED	1100	31	NO	yes	referred	yes	35.7
post	SURVIVED	1400	31	NO	yes	referred	yes	35.9
post	SURVIVED	1530	31	YES	yes	referred	yes	35.9
post	SURVIVED	1670	31	YES	yes	referred	yes	37.1
post	SURVIVED	2300	31	YES	yes		yes	37
post	SURVIVED	2000	31	YES	yes	referred	yes	36.8
post	SURVIVED	1900	31	YES	yes	referred	yes	36.7
post	SURVIVED	2000	31	YES	yes	referred	yes	36.9
post	SURVIVED	1500	31	YES	yes	inborn	yes	36.9
post	SURVIVED	2300	31	YES	yes	inborn	yes	37
post	SURVIVED	2000	31	YES	yes	inborn	yes	37.3
post	SURVIVED	1600	31	YES	yes	referred	yes	36.5
post	SURVIVED	1400	31	YES	yes	inborn	yes	36.6
post	SURVIVED	1500	31	YES	yes	referred	yes	36.3
post	SURVIVED	1500	31	YES	yes	referred	yes	36.5
post	SURVIVED	1400	31	YES	yes	inborn	yes	37.1
post	SURVIVED	2000	31	YES	yes	referred	yes	36.8
post	SURVIVED	2420	31	YES	yes	referred	yes	36.7
post	SURVIVED	1450	31	YES	yes	referred	yes	36.4
post	SURVIVED	1470	31	YES	yes	referred	yes	36.8
post	SURVIVED	1410	31	YES	yes	referred	yes	36.2
post	SURVIVED	1500	31	YES	yes	inborn	yes	36.9
post	SURVIVED	1690	31	NO	yes	referred	yes	36.1
post	SURVIVED	1600	31	YES	yes	inborn	yes	35.9
post	SURVIVED	1600	31	YES	yes	referred	yes	36.2
post	SURVIVED	2000	31	YES	yes	referred	yes	36.2
post	SURVIVED	2100	31	NO	yes	referred	yes	36
post	SURVIVED	1800	31	YES	yes	inborn	yes	36.5
post	SURVIVED	1850	31	YES	yes	inborn	yes	36.5
post	SURVIVED	1750	31	YES	yes	referred	yes	36.4
post	SURVIVED	1250	31	YES	yes	inborn	yes	36.3
post	SURVIVED	1000	31	YES	yes	referred	yes	37.4
post	SURVIVED	1100	31	YES	yes	referred	yes	36.6
post	SURVIVED	1400	31	YES	yes	inborn	yes	37.1
post	SURVIVED	2260	31	YES	yes	inborn	yes	37.1
post	SURVIVED	1300	31	NO	no	referred	yes
post	SURVIVED	1300	31	YES	yes	referred	yes	36.6
post	SURVIVED	2050	31	NO	no	referred	yes
post	SURVIVED	1000	31	YES	yes	inborn	yes	37.1
post	SURVIVED	1900	31	YES	yes	inborn	yes	36.8
post	SURVIVED	1100	31	NO	no	referred	yes	36
post	SURVIVED	1600	31	NO	no	referred	yes	36.1
post	SURVIVED	2200	31	YES	yes	inborn	yes	36.9
post	SURVIVED	1400	31	YES	yes	inborn	yes	36.9
post	SURVIVED	2200	31	YES	yes	inborn	yes	36.9
post	SURVIVED	1750	31	NO	no	referred	yes	36
post	SURVIVED	1100	31	YES	yes	inborn	yes	36.8
post	SURVIVED	1600	31	YES	yes	inborn	yes	37.1
post	SURVIVED	1500	31	NO	no	referred	yes	36
post	SURVIVED	2200	31	YES	yes	inborn	yes	36.9
post	SURVIVED	1800	31	YES	yes	referred	yes	36.7
post	SURVIVED	2100	31	YES	yes	referred	yes	36.6
post	SURVIVED	1550	31	YES	yes	referred	yes	36.8
post	SURVIVED	2200	31	YES	yes	inborn	yes	36.9
post	SURVIVED	2250	31	YES	yes	inborn	yes	36.8
post	SURVIVED	1270	31	YES	yes	inborn	yes	36.9
post	SURVIVED	2000	31	YES	yes	inborn	yes	36.9
post	SURVIVED	1900	31	NO	no	referred	yes	35.9
post	SURVIVED	1300	31	YES	yes	inborn	yes	36.9
post	SURVIVED	1200	31	YES	yes	referred	yes	36.7
post	SURVIVED	1800	31	YES	yes	inborn	yes	36.9
post	SURVIVED	1300	31	YES	yes	inborn	yes	37.1
post	SURVIVED	1900	31	NO	no	referred	yes
post	SURVIVED	1600	31	YES	yes	inborn	yes	37.1
post	SURVIVED	2100	31	YES	yes	inborn	yes	36
post	SURVIVED	1700	31	YES	yes	inborn	yes	36
post	SURVIVED	1600	31	YES	yes	referred	yes	35.6
post	SURVIVED	2250	31	YES	yes	referred	yes	36
post	SURVIVED	1300	31	YES	yes	referred	yes	36
post	SURVIVED	1600	31	YES	yes	referred	yes	35.5
post	SURVIVED	1650	31	NO	yes	referred	yes	35.9
post	SURVIVED	2250	31	YES	yes	referred	yes	36
post	SURVIVED	1700	31	YES	yes	referred	yes	36.2
post	SURVIVED	1950	31	YES	yes	inborn	yes	36
post	SURVIVED	1300	31	YES	yes	referred	yes	36
post	SURVIVED	1600	31	YES	yes	referred	yes	35.8
post	SURVIVED	2300	31	YES	yes	inborn	yes	36
post	SURVIVED	1900	31	YES	yes	referred	yes	36.8
post	SURVIVED	1900	31	YES	yes	inborn	yes	35.2
post	SURVIVED	1900	31	YES	yes	inborn	yes	36
post	SURVIVED	1900	31	YES	yes		yes	36.8
post	SURVIVED	2150	31	YES	no	inborn	yes	35.2
post	SURVIVED	1900	31	YES	yes		yes	36.4
post	SURVIVED	1080	31	YES	yes		yes	34.9
post	SURVIVED	1200	31	YES	yes	inborn	yes
post	SURVIVED	1500	31	YES	yes	referred	yes
post	SURVIVED	1500	31	YES	yes	inborn	yes
post	SURVIVED	2200	31	YES	yes	referred	yes	36.8
post	SURVIVED	1400	31	YES	yes	inborn	yes
post	SURVIVED	1300	31	YES	yes	inborn	yes
post	SURVIVED	1400	31	NO	yes	inborn	yes
post	SURVIVED	1030	31	YES	yes	inborn	yes
post	SURVIVED	1700	31	NO	yes	referred	yes	36.8
post	SURVIVED	1600	31	YES	yes	referred	yes
post	SURVIVED	1400	31	NO	yes	inborn	yes
post	SURVIVED	1700	31	NO	yes	referred	yes
post	SURVIVED	1400	31	YES	yes	referred	yes
post	SURVIVED	1300	31	YES	yes	inborn	yes	36.6
post	SURVIVED	1350	31	YES	yes	inborn	yes	36.9
post	SURVIVED	2100	31	YES	yes	referred	yes	37.1
post	SURVIVED	1400	31	YES	yes	referred	yes
post	SURVIVED	1800	31	YES	yes	inborn	yes
post	SURVIVED	1900	31	YES	yes	referred	yes
post	SURVIVED	1800	31	YES	yes	inborn	yes
post	SURVIVED	2000	31	YES	yes	inborn	yes
post	SURVIVED	1600	31	YES	yes	inborn	yes
post	SURVIVED	1500	31	YES	yes	inborn	yes	35.9
post	SURVIVED	1300	31	YES	yes	referred	yes	36.9
post	SURVIVED	2450	31	YES	yes	inborn	yes	37.3
post	SURVIVED	1600	31	YES	yes	referred	yes
post	SURVIVED	2000	31	YES	yes	referred	yes
post	SURVIVED	1800	31	YES	yes	inborn	yes
post	SURVIVED	2400	31	YES	yes	inborn	yes
post	SURVIVED	1600	31	YES	yes	referred	yes	36.7
post	SURVIVED	1800	31	YES	yes	referred	yes
post	SURVIVED	1600	31	YES	yes	referred	yes
post	SURVIVED	1900	31	YES	yes	inborn	yes
post	SURVIVED	2000	31	YES	yes	inborn	yes
post	SURVIVED	2100	31	YES	yes	referred	yes
post	SURVIVED	1200	31	YES	yes	referred	yes	37.2
post	SURVIVED	1300	31	YES	yes	referred	yes	36.4
post	SURVIVED	2000	31	YES	yes	inborn	yes	36.9
post	SURVIVED	1600	31	YES	yes	referred	yes	36.7
post	SURVIVED	1800	31	YES	yes	inborn	yes
post	SURVIVED	2200	31	YES	yes	inborn	yes
post	SURVIVED	1600	31	YES	yes	inborn	yes	37.5
post	SURVIVED	2000	31	YES	yes	inborn	yes	36.4
post	SURVIVED	1950	31	YES	yes	referred	yes	37.3
post	SURVIVED	1950	31	YES	yes	referred	yes
post	SURVIVED	800	31	YES	yes	referred	yes
post	SURVIVED	1400	31	YES	yes	referred	yes
post	SURVIVED	2000	31	YES	yes	referred	yes
post	SURVIVED	2400	31	YES	yes	inborn	yes	37.4
post	SURVIVED	1050	31	YES	yes	inborn	yes
post	SURVIVED	1200	31	YES	yes	inborn	yes
post	SURVIVED	1700	31	YES	yes	inborn	yes
post	SURVIVED	1200	31	YES	yes	referred	yes
post	SURVIVED	1140	31	YES	yes	referred	yes
post	SURVIVED	1180	31	YES	yes	referred	yes
post	SURVIVED	1800	31	YES	yes	referred	yes
post	SURVIVED	1800	31	YES	yes	inborn	yes
post	SURVIVED	2300	31	NO	yes	referred	yes	35.8
post	SURVIVED	1250	31	YES	yes	inborn	yes	35.7
post	SURVIVED	1850	31	YES	yes	referred	yes	36
post	SURVIVED	1750	31	YES	yes	inborn	yes	36
post	SURVIVED	1400	31	YES	yes	inborn	yes	36
post	SURVIVED	1700	31	NO	yes	referred	yes	36
post	SURVIVED	1500	31	YES	yes	inborn	yes	36
post	SURVIVED	1850	31	YES	yes	inborn	yes	36
post	DEATH	800	31	NO	no	referred	yes	35.9
post	DEATH	1150	31	YES	yes	inborn	yes	36
post	DEATH	850	31	NO	no	inborn	yes	37.1
post	DEATH	1750	31	YES	yes	referred	yes	36
post	DEATH	1200	31	YES	yes	referred	yes	36.6
post	DEATH	2450	31	YES	yes	referred	yes	36.1
post	DEATH	1400	31	YES	yes	referred	yes	36.6
post	DEATH	1400	31	NO	no	referred	yes	36.1
post	DEATH	1600	31	YES	yes	referred	yes	36.8
post	DEATH	1200	31	YES	yes	inborn	yes	36.8
post	DEATH	1200	31	NO	yes	referred	yes	35.7
post	DEATH	1665	31	YES	yes	inborn	yes	35
post	DEATH	900	31	YES	no	referred	yes	36.6
post	DEATH	1000	31	YES	no	referred	yes	36.8
post	DEATH	1500	31	YES	no	inborn	yes	36
post	DEATH	1200	31	YES	yes	inborn	yes	36.8
post	DEATH	1600	31	NO	yes	referred	yes
post	DEATH	800	31	YES	yes	inborn	yes
post	DEATH	2000	31	YES	yes	referred	yes
post	DEATH	750	31	YES	yes	referred	yes
post	DEATH	1700	31	NO	yes	referred	yes	35.8
post	DEATH	1200	31	NO	yes	referred	yes	36
post	DEATH	1750	31	YES	no	inborn	yes	36.2
post	FSB	1350	31	NO	no	referred	yes
post	FSB	1200	31	NO	no	referred	yes
post	FSB	900	31	NO	no	referred	yes
post	FSB	900	31	NO	no	referred	yes
post	FSB	2000	31	YES	yes	inborn	yes	36.5
post	FSB	1300	31	NO	no	inborn	yes
post	FSB	2000	31	NO	no	referred	yes
post	FSB	1500	31	YES	yes	inborn	yes	36.5
post	FSB	2000	31	YES	yes	inborn	yes	36.5
post	FSB	1400	31	YES	yes	referred	yes	36.5
post	FSB	1500	31	NO	no	referred	yes
post	FSB	1600	31	NO	no	referred	yes
post	FSB	1500	31	YES	yes	inborn	yes	36.5
post	FSB	1500	31	NO	no	referred	yes
post	FSB	2000	31	YES	yes	inborn	yes	36.5
post	FSB	2000	31	NO	no	referred	yes
post	FSB	1750	31	NO	no	referred	yes
post	FSB	1100	31	YES	yes	inborn	yes	36.5
post	FSB	1650	31	YES	no	inborn	yes
post	FSB	1900	31	YES	yes	inborn	yes
post	FSB	1500	31	YES	no	inborn	yes
post	FSB	2100	31	NO	no	referred	yes
post	FSB	2050	31	NO	no	referred	yes
post	FSB	1400	31	YES	no	inborn	yes
post	FSB	1600	31	NO	no	referred	yes
post	SURVIVED	1100	32	NO	yes	inborn	yes	37.2
post	SURVIVED	1300	32	YES	yes	referred	yes	36.9
post	SURVIVED	1100	32	YES	yes	referred	yes	36.2
post	SURVIVED	1600	32	YES	yes		yes	36.1
post	SURVIVED	1900	32	YES	yes	inborn	yes	37.1
post	SURVIVED	2200	32	YES	yes	referred	yes	36.8
post	SURVIVED	1100	32	YES	yes	inborn	yes	36
post	SURVIVED	1200	32	YES	yes		yes	37.1
post	SURVIVED	1850	32	YES	yes	referred	yes	36.1
post	SURVIVED	1300	32	YES	yes	inborn	yes	37.2
post	SURVIVED	1100	32	YES	yes		yes	36
post	SURVIVED	1300	32	YES	yes	referred	yes	36.5
post	SURVIVED	1000	32	YES	yes	referred	yes	36.2
post	SURVIVED	1600	32	NO	yes	referred	yes	36.8
post	SURVIVED	1000	32	YES	yes	inborn	yes	37.3
post	SURVIVED	1300	32	YES	yes	inborn	yes	36.4
post	SURVIVED	1850	32	YES	yes		yes	36.2
post	SURVIVED	1700	32	YES	yes	inborn	yes	37.1
post	SURVIVED	1100	32	YES	yes	referred	yes	36.6
post	SURVIVED	2200	32	YES	yes	inborn	yes	36.4
post	SURVIVED	1400	32	NO	no	referred	yes	35.5
post	SURVIVED	1750	32	YES	yes	inborn	yes	36
post	SURVIVED	1600	32	YES	yes	inborn	yes	35.9
post	SURVIVED	1700	32	YES	yes	inborn	yes	36
post	SURVIVED	1600	32	YES	yes	referred	yes	35.5
post	SURVIVED	1500	32	YES	yes	inborn	yes	35.3
post	SURVIVED	1800	32	NO	yes	referred	yes	36
post	SURVIVED	1400	32	YES	yes	referred	yes	35.9
post	SURVIVED	2400	32	YES	yes	inborn	yes	35.4
post	SURVIVED	1200	32	YES	yes	referred	yes	35
post	SURVIVED	1900	32	YES	yes	referred	yes	35.9
post	SURVIVED	2300	32	YES	yes	referred	yes	36
post	SURVIVED	1700	32	NO	yes	inborn	yes	35.9
post	SURVIVED	2130	32	YES	yes	referred	yes	36.9
post	SURVIVED	1600	32	YES	yes		yes	37.2
post	SURVIVED	1900	32	YES	yes	referred	yes	37
post	SURVIVED	1800	32	YES	yes	referred	yes	37.6
post	SURVIVED	1500	32	YES	yes	inborn	yes	37
post	SURVIVED	1650	32	YES	yes	referred	yes	37.3
post	SURVIVED	1800	32	YES	yes	referred	yes	36.5
post	SURVIVED	1300	32	YES	yes	inborn	yes	36.6
post	SURVIVED	1600	32	YES	yes	inborn	yes	37.3
post	SURVIVED	1600	32	YES	yes	inborn	yes	37.5
post	SURVIVED	2100	32	NO	yes	referred	yes	36.4
post	SURVIVED	2100	32	NO	yes	referred	yes	36.7
post	SURVIVED	1600	32	YES	yes	referred	yes	37
post	SURVIVED	2000	32	YES	yes	inborn	yes	36.4
post	SURVIVED	2300	32	YES	yes	referred	yes	37.3
post	SURVIVED	1450	32	YES	yes	inborn	yes	36.6
post	SURVIVED	1700	32	YES	yes	inborn	yes	36.5
post	SURVIVED	1100	32	NO	yes	referred	yes	36
post	SURVIVED	2200	32	YES	yes	referred	yes	36.4
post	SURVIVED	2200	32	YES	yes	referred	yes	37.2
post	SURVIVED	2300	32	YES	yes	referred	yes	37.2
post	SURVIVED	1500	32	NO	yes	referred	yes	36.1
post	SURVIVED	2000	32	YES	yes	inborn	yes	37.7
post	SURVIVED	2200	32	YES	yes	referred	yes	37.3
post	SURVIVED	1375	32	YES	yes	inborn	yes	36.7
post	SURVIVED	1600	32	YES	yes	referred	yes	37.2
post	SURVIVED	2200	32	YES	yes	referred	yes	37.2
post	SURVIVED	2200	32	NO	yes	referred	yes	35.9
post	SURVIVED	2100	32	NO	yes	referred	yes	36
post	SURVIVED	1600	32	YES	yes	referred	yes	36.9
post	SURVIVED	1300	32	YES	yes	referred	yes	36.5
post	SURVIVED	1400	32	NO	yes	referred	yes	35.8
post	SURVIVED	2000	32	YES	yes	inborn	yes	36.8
post	SURVIVED	1700	32	YES	yes	inborn	yes	36.7
post	SURVIVED	1800	32	YES	yes	referred	yes	35.7
post	SURVIVED	1750	32	YES	yes	inborn	yes	36.5
post	SURVIVED	1750	32	YES	yes	inborn	yes	36.6
post	SURVIVED	1700	32	YES	yes	referred	yes	36.1
post	SURVIVED	1200	32	YES	yes	referred	yes	36.2
post	SURVIVED	2050	32	YES	yes	referred	yes	36.6
post	SURVIVED	1800	32	YES	yes	referred	yes	37
post	SURVIVED	1900	32	YES	yes	referred	yes	36.6
post	SURVIVED	1900	32	YES	yes	referred	yes	36.5
post	SURVIVED	2200	32	YES	yes	referred	yes	36.8
post	SURVIVED	1500	32	YES	yes	referred	yes	36.1
post	SURVIVED	1900	32	YES	yes	referred	yes	36.9
post	SURVIVED	1700	32	YES	yes	referred	yes	36.8
post	SURVIVED	1500	32	NO	yes	referred	yes	36.9
post	SURVIVED	1600	32	YES	yes	referred	yes	36.7
post	SURVIVED	1850	32	NO	yes	referred	yes	35.7
post	SURVIVED	1900	32	YES	yes	inborn	yes	36.9
post	SURVIVED	1900	32	YES	yes	referred	yes	36.2
post	SURVIVED	1800	32	YES	yes	inborn	yes	36.8
post	SURVIVED	1350	32	YES	yes	inborn	yes	36.5
post	SURVIVED	2100	32	YES	yes	inborn	yes	36.4
post	SURVIVED	1660	32	YES	yes	referred	yes	36.8
post	SURVIVED	2400	32	NO	yes	inborn	yes	36.4
post	SURVIVED	2400	32	YES	yes	referred	yes	36.6
post	SURVIVED	1700	32	YES	yes	inborn	yes	36.3
post	SURVIVED	1500	32	YES	yes	inborn	yes	36.2
post	SURVIVED	1500	32	NO	yes	inborn	yes	36.3
post	SURVIVED	1900	32	YES	yes	inborn	yes	36.9
post	SURVIVED	1200	32	YES	yes	referred	yes	36
post	SURVIVED	2300	32	YES	yes	referred	yes	36.2
post	SURVIVED	1850	32	YES	yes	inborn	yes	36
post	SURVIVED	1800	32	YES	yes	referred	yes	37
post	SURVIVED	1700	32	YES	yes	referred	yes	36.3
post	SURVIVED	1750	32	YES	yes	referred	yes	36.6
post	SURVIVED	1520	32	YES	yes	referred	yes	36.8
post	SURVIVED	2000	32	YES	yes	referred	yes	36.2
post	SURVIVED	1900	32	YES	yes	referred	yes	36.8
post	SURVIVED	1450	32	YES	yes	referred	yes	36.5
post	SURVIVED	1900	32	YES	yes	referred	yes	36
post	SURVIVED	2200	32	YES	yes	referred	yes	36.7
post	SURVIVED	1500	32	YES	yes	inborn	yes	36.4
post	SURVIVED	1400	32	YES	yes	referred	yes	36.6
post	SURVIVED	1450	32	YES	yes	inborn	yes	36.1
post	SURVIVED	1600	32	YES	yes	inborn	yes	37.1
post	SURVIVED	2200	32	YES	yes	referred	yes	37.2
post	SURVIVED	1500	32	NO	yes	inborn	yes	36.3
post	SURVIVED	2100	32	NO	yes	referred	yes	36.8
post	SURVIVED	1400	32	YES	yes	referred	yes	36.5
post	SURVIVED	2000	32	YES	yes	inborn	yes	36.8
post	SURVIVED	1400	32	NO	no	referred	yes	36.4
post	SURVIVED	1520	32	YES	yes	referred	yes	36.8
post	SURVIVED	2100	32	NO	no	referred	yes	36.1
post	SURVIVED	1900	32	NO	no	referred	yes	36.1
post	SURVIVED	2100	32	YES	yes	referred	yes	36.5
post	SURVIVED	1290	32	YES	yes	referred	yes	36.7
post	SURVIVED	1750	32	YES	yes	inborn	yes	37.1
post	SURVIVED	1800	32	YES	yes	inborn	yes	37.1
post	SURVIVED	1900	32	NO	no	referred	yes	36.2
post	SURVIVED	2000	32	YES	yes	referred	yes	36.6
post	SURVIVED	1900	32	YES	yes	inborn	yes	37
post	SURVIVED	2200	32	YES	yes	inborn	yes	36.8
post	SURVIVED	1700	32	NO	no	referred	yes	36.1
post	SURVIVED	2210	32	YES	yes	inborn	yes	36.8
post	SURVIVED	2100	32	YES	yes	referred	yes	36.5
post	SURVIVED	1800	32	YES	yes	inborn	yes	37.1
post	SURVIVED	2000	32	YES	yes	referred	yes	36.6
post	SURVIVED	2300	32	YES	yes	referred	yes	36.6
post	SURVIVED	1900	32	NO	no	referred	yes	36.2
post	SURVIVED	1600	32	NO	no	referred	yes	36
post	SURVIVED	1800	32	NO	no	referred	yes	36
post	SURVIVED	2000	32	YES	yes	inborn	yes	36.8
post	SURVIVED	2400	32	YES	yes	referred	yes	36.7
post	SURVIVED	1800	32	YES	yes	referred	yes	36.7
post	SURVIVED	1500	32	YES	yes	referred	yes	36.6
post	SURVIVED	2000	32	YES	yes	inborn	yes	36.8
post	SURVIVED	2050	32	YES	yes	referred	yes	36.8
post	SURVIVED	1850	32	NO	no	referred	yes	36.3
post	SURVIVED	1800	32	YES	yes	inborn	yes	36.9
post	SURVIVED	1650	32	YES	yes	inborn	yes	36.8
post	SURVIVED	2000	32	YES	yes	referred	yes	36.6
post	SURVIVED	1600	32	YES	yes	inborn	yes	37
post	SURVIVED	2000	32	NO	no	referred	yes	36.2
post	SURVIVED	2100	32	NO	no	referred	yes	36.2
post	SURVIVED	1800	32	YES	yes	inborn	yes	37.5
post	SURVIVED	1900	32	YES	yes	referred	yes	37.3
post	SURVIVED	2200	32	YES	yes	referred	yes	36.6
post	SURVIVED	1800	32	YES	yes	inborn	yes	37
post	SURVIVED	1500	32	YES	yes	inborn	yes	37.1
post	SURVIVED	1650	32	YES	yes	inborn	yes	36.8
post	SURVIVED	2000	32	YES	yes	inborn	yes	37
post	SURVIVED	2000	32	YES	yes	referred	yes	36.6
post	SURVIVED	1700	32	NO	no	referred	yes	36
post	SURVIVED	1500	32	YES	yes	referred	yes	36.6
post	SURVIVED	1500	32	YES	yes	inborn	yes	37
post	SURVIVED	1750	32	YES	yes	inborn	yes	37
post	SURVIVED	1000	32	YES	yes	inborn	yes	37.1
post	SURVIVED	1600	32	YES	yes	inborn	yes	37
post	SURVIVED	1900	32	YES	yes	inborn	yes	37.1
post	SURVIVED	1150	32	YES	yes	inborn	yes	37
post	SURVIVED	1540	32	YES	yes	inborn	yes	37
post	SURVIVED	2100	32	YES	yes	inborn	yes	36.8
post	SURVIVED	1800	32	YES	yes	referred	yes	36.8
post	SURVIVED	1900	32	YES	yes	referred	yes	36.5
post	SURVIVED	2400	32	NO	no	referred	yes	36.2
post	SURVIVED	2100	32	YES	yes	inborn	yes	36.8
post	SURVIVED	2300	32	YES	yes	referred	yes	36.5
post	SURVIVED	1500	32	YES	yes	referred	yes	36.6
post	SURVIVED	1400	32	NO	no	referred	yes	36.4
post	SURVIVED	1700	32	YES	yes	referred	yes	36.5
post	SURVIVED	1700	32	YES	yes	inborn	yes	37.1
post	SURVIVED	1700	32	YES	yes	inborn	yes	37.1
post	SURVIVED	1800	32	YES	yes	referred	yes	36.8
post	SURVIVED	1900	32	NO	no	referred	yes	36.4
post	SURVIVED	2100	32	NO	no	referred	yes	36.4
post	SURVIVED	1500	32	YES	yes	inborn	yes	37.1
post	SURVIVED	2200	32	YES	yes	inborn	yes	37.1
post	SURVIVED	1300	32	YES	yes	inborn	yes	37
post	SURVIVED	1800	32	YES	yes	referred	yes	36.5
post	SURVIVED	2100	32	YES	yes	referred	yes	36.6
post	SURVIVED	1700	32	YES	yes	inborn	yes	37
post	SURVIVED	1700	32	YES	yes	referred	yes	36.6
post	SURVIVED	2000	32	NO	no	referred	yes	36.4
post	SURVIVED	1200	32	YES	yes	referred	yes	37.3
post	SURVIVED	2000	32	YES	yes	inborn	yes	37.1
post	SURVIVED	2000	32	YES	yes	inborn	yes	37.1
post	SURVIVED	1900	32	YES	yes	inborn	yes	37
post	SURVIVED	2000	32	YES	yes	inborn	yes	37.1
post	SURVIVED	1800	32	YES	yes	inborn	yes	37.1
post	SURVIVED	1800	32	YES	yes	inborn	yes	36
post	SURVIVED	1600	32	NO	yes	referred	yes	35.8
post	SURVIVED	1650	32	NO	yes	inborn	yes	35.9
post	SURVIVED	2300	32	NO	yes	referred	yes	36
post	SURVIVED	1600	32	NO	yes	inborn	yes	35.8
post	SURVIVED	2100	32	YES	yes	inborn	yes	35.7
post	SURVIVED	1600	32	YES	yes	referred	yes	35.9
post	SURVIVED	1600	32	YES	yes	referred	yes	35.8
post	SURVIVED	2550	32	NO	yes	referred	yes	35.5
post	SURVIVED	1600	32	YES	yes	referred	yes	36
post	SURVIVED	1150	32	YES	yes	referred	yes	35.8
post	SURVIVED	1700	32	NO	yes	referred	yes	35.9
post	SURVIVED	1800	32	YES	yes	referred	yes	36
post	SURVIVED	1400	32	NO	yes	referred	yes	35.6
post	SURVIVED	2100	32	NO	yes	referred	yes	36
post	SURVIVED	2100	32	NO	yes	referred	yes	36
post	SURVIVED	2200	32	YES	yes	inborn	yes	36
post	SURVIVED	1600	32	YES	yes	referred	yes	36
post	SURVIVED	1950	32	YES	yes	inborn	yes	36
post	SURVIVED	950	32	YES	yes	inborn	yes	36
post	SURVIVED	1950	32	YES	yes	inborn	yes	36
post	SURVIVED	1900	32	YES	yes	inborn	yes	36.1
post	SURVIVED	1800	32	YES	yes		yes	36.5
post	SURVIVED	1950	32	YES	yes		yes	36.2
post	SURVIVED	2115	32	NO	yes		yes	36
post	SURVIVED	1810	32	YES	yes		yes	36
post	SURVIVED	2100	32	YES	yes	inborn	yes
post	SURVIVED	1900	32	YES	yes	inborn	yes
post	SURVIVED	2200	32	YES	yes	referred	yes
post	SURVIVED	2000	32	YES	yes	inborn	yes
post	SURVIVED	2300	32	YES	yes	inborn	yes
post	SURVIVED	1500	32	YES	yes	inborn	yes
post	SURVIVED	1700	32	YES	yes	inborn	yes	37.1
post	SURVIVED	2300	32	YES	yes	inborn	yes
post	SURVIVED	2200	32	YES	yes	inborn	yes	37.1
post	SURVIVED	2300	32	YES	yes	referred	yes
post	SURVIVED	1850	32	YES	yes	inborn	yes
post	SURVIVED	2000	32	NO	yes	referred	yes
post	SURVIVED	1600	32	YES	yes	inborn	yes	37.4
post	SURVIVED	2200	32	NO	yes	referred	yes
post	SURVIVED	1400	32	YES	yes	inborn	yes
post	SURVIVED	2400	32	YES	yes	inborn	yes
post	SURVIVED	1450	32	YES	yes	referred	yes
post	SURVIVED	1350	32	YES	yes	referred	yes
post	SURVIVED	1900	32	YES	yes	inborn	yes	36.5
post	SURVIVED	1200	32	YES	yes	referred	yes	36.5
post	SURVIVED	2200	32	YES	yes	referred	yes	37.2
post	SURVIVED	1800	32	YES	yes	inborn	yes	36.9
post	SURVIVED	2300	32	YES	yes	referred	yes	37
post	SURVIVED	2000	32	YES	yes	referred	yes
post	SURVIVED	1900	32	YES	yes	referred	yes
post	SURVIVED	1900	32	YES	yes	inborn	yes	36.8
post	SURVIVED	1900	32	YES	yes	referred	yes	36.9
post	SURVIVED	1030	32	YES	yes	referred	yes
post	SURVIVED	1700	32	YES	yes	inborn	yes
post	SURVIVED	1900	32	YES	yes	referred	yes	37.2
post	SURVIVED	1600	32	YES	yes	referred	yes
post	SURVIVED	1700	32	YES	yes	inborn	yes
post	SURVIVED	2250	32	YES	yes	inborn	yes
post	SURVIVED	1500	32	YES	yes	inborn	yes
post	SURVIVED	1900	32	YES	yes	referred	yes
post	SURVIVED	1500	32	YES	yes	referred	yes	37
post	SURVIVED	1500	32	YES	yes	inborn	yes
post	SURVIVED	1300	32	YES	yes	referred	yes
post	SURVIVED	2200	32	YES	yes	inborn	yes	36.7
post	SURVIVED	1000	32	YES	yes	referred	yes	37.1
post	SURVIVED	1500	32	YES	yes	inborn	yes	36.4
post	SURVIVED	1600	32	YES	yes	referred	yes
post	SURVIVED	1650	32	YES	yes	referred	yes	36.9
post	SURVIVED	1200	32	YES	yes	inborn	yes
post	SURVIVED	1800	32	YES	yes	referred	yes
post	SURVIVED	1550	32	YES	yes	inborn	yes	36.4
post	SURVIVED	1800	32	YES	yes	inborn	yes	36.8
post	SURVIVED	1500	32	YES	yes	inborn	yes	36.6
post	SURVIVED	1700	32	YES	yes	inborn	yes
post	SURVIVED	2000	32	YES	yes	referred	yes	36.7
post	SURVIVED	1600	32	YES	yes	referred	yes	37.2
post	SURVIVED	1300	32	YES	yes	inborn	yes
post	SURVIVED	1300	32	YES	yes	referred	yes
post	SURVIVED	1800	32	YES	yes	referred	yes
post	SURVIVED	1900	32	YES	yes	inborn	yes	36.8
post	SURVIVED	1800	32	YES	yes	inborn	yes	36.6
post	SURVIVED	1600	32	YES	yes	inborn	yes
post	SURVIVED	2000	32	YES	yes	inborn	yes
post	SURVIVED	1700	32	YES	yes	referred	yes	36.9
post	SURVIVED	1700	32	YES	yes	referred	yes	37.2
post	SURVIVED	1500	32	YES	yes	inborn	yes	36.8
post	SURVIVED	1700	32	YES	yes	inborn	yes	36.7
post	SURVIVED	1800	32	YES	yes	referred	yes
post	SURVIVED	1600	32	YES	yes	inborn	yes	36.8
post	SURVIVED	2200	32	YES	yes	inborn	yes	36.9
post	SURVIVED	1700	32	YES	yes	inborn	yes	36
post	SURVIVED	1300	32	YES	yes	referred	yes
post	SURVIVED	1100	32	YES	yes	inborn	yes	36.4
post	SURVIVED	1700	32	YES	yes	referred	yes	36.9
post	SURVIVED	1600	32	YES	yes	referred	yes	35.9
post	SURVIVED	2000	32	YES	yes	inborn	yes
post	SURVIVED	2400	32	YES	yes	referred	yes
post	SURVIVED	1700	32	YES	yes	referred	yes
post	SURVIVED	1800	32	YES	yes	inborn	yes	37.2
post	SURVIVED	1900	32	YES	yes	referred	yes
post	SURVIVED	1900	32	NO	yes	referred	yes
post	SURVIVED	2000	32	YES	yes	inborn	yes
post	SURVIVED	2000	32	YES	yes	referred	yes
post	SURVIVED	1650	32	YES	yes	inborn	yes	37.3
post	SURVIVED	2100	32	NO	yes	referred	yes
post	SURVIVED	1900	32	YES	yes	inborn	yes
post	SURVIVED	1500	32	YES	yes	inborn	yes
post	SURVIVED	1200	32	YES	yes	inborn	yes
post	SURVIVED	2050	32	YES	yes	inborn	yes
post	SURVIVED	2400	32	NO	yes	referred	yes
post	SURVIVED	1900	32	NO	yes	referred	yes
post	SURVIVED	2000	32	YES	yes	inborn	yes
post	SURVIVED	2200	32	YES	yes	referred	yes
post	SURVIVED	2000	32	YES	yes	inborn	yes
post	SURVIVED	2200	32	YES	yes	referred	yes
post	SURVIVED	2300	32	YES	yes	referred	yes
post	SURVIVED	1000	32	YES	yes	inborn	yes
post	SURVIVED	2100	32	YES	yes	referred	yes
post	SURVIVED	1250	32	YES	yes	inborn	yes
post	SURVIVED	1400	32	YES	yes	inborn	yes
post	SURVIVED	1300	32	YES	yes	inborn	yes
post	SURVIVED	1800	32	YES	yes	inborn	yes
post	SURVIVED	1550	32	YES	yes	referred	yes	37.1
post	SURVIVED	900	32	YES	yes	referred	yes	37.1
post	SURVIVED	1100	32	YES	yes	referred	yes	36.7
post	SURVIVED	1500	32	YES	yes	inborn	yes	36.1
post	SURVIVED	4500	32	YES	yes	inborn	yes	35.6
post	SURVIVED	2250	32	YES	yes	inborn	yes	36
post	SURVIVED	1900	32	YES	yes	inborn	yes	36
post	SURVIVED	2500	32	YES	yes	inborn	yes	36
post	SURVIVED	1650	32	YES	yes	referred	yes	35.8
post	SURVIVED	1350	32	YES	yes	inborn	yes	35.9
post	SURVIVED	1300	32	YES	yes	referred	yes	36.2
post	SURVIVED	1950	32	YES	yes	referred	yes	36
post	SURVIVED	2200	32	YES	yes	referred	yes	36
post	SURVIVED	1650	32	YES	yes	inborn	yes	36.1
post	SURVIVED	1300	32	YES	yes	inborn	yes	35.8
post	SURVIVED	1800	32	YES	yes	inborn	yes	35.8
post	SURVIVED	1750	32	YES	yes	inborn	yes	36
post	SURVIVED	1150	32	YES	yes	inborn	yes	36
post	SURVIVED	1700	32	YES	yes	inborn	yes	36
post	SURVIVED	1900	32	YES	yes	inborn	yes	37
post	SURVIVED	1400	32	YES	yes	inborn	yes	36
post	SURVIVED	1000	32	YES	yes	inborn	yes	36
post	DEATH	1020	32	NO	no		yes	35.9
post	DEATH	1000	32	NO	no	referred	yes	37.1
post	DEATH	1300	32	YES	yes		yes	36.4
post	DEATH	1100	32	YES	yes	referred	yes	36.2
post	DEATH	1100	32	YES	yes	inborn	yes	35.5
post	DEATH	1800	32	NO	yes	inborn	yes	36
post	DEATH	1500	32	YES	yes	inborn	yes	36.7
post	DEATH	1400	32	YES	yes	inborn	yes	36.9
post	DEATH	1500	32	YES	yes	referred	yes	36.1
post	DEATH	1700	32	NO	yes	referred	yes	36.5
post	DEATH	1090	32	NO	no	referred	yes
post	DEATH	1300	32	NO	no	referred	yes	36
post	DEATH	2100	32	NO	no	referred	yes	36.1
post	DEATH	1200	32	YES	yes	referred	yes	36.6
post	DEATH	1800	32	YES	yes	referred	yes	36.7
post	DEATH	1400	32	NO	no	referred	yes
post	DEATH	1400	32	YES	yes	inborn	yes	37.1
post	DEATH	1700	32	YES	yes	inborn	yes	37
post	DEATH	900	32	YES	yes	inborn	yes	37
post	DEATH	1800	32	NO	no	referred	yes	36.1
post	DEATH	1900	32	YES	yes	referred	yes	36.6
post	DEATH	2400	32	NO	no	referred	yes
post	DEATH	1400	32	NO	yes	referred	yes	35.8
post	DEATH	1200	32	YES	yes	inborn	yes	36
post	DEATH	1545	32	NO	yes		yes	36.5
post	DEATH	1500	32	YES	yes	inborn	yes
post	DEATH	1600	32	YES	no	referred	yes	36.8
post	DEATH	2100	32	NO	yes	referred	yes
post	DEATH	1100	32	YES	yes	inborn	yes
post	DEATH	2000	32	YES	no	inborn	yes
post	DEATH	1900	32	YES	yes	referred	yes
post	DEATH	2200	32	YES	no	referred	yes
post	DEATH	1200	32	YES	yes	inborn	yes
post	DEATH	1800	32	YES	no	referred	yes
post	DEATH	1300	32	NO	yes	referred	yes	35
post	DEATH	1700	32	NO	yes	referred	yes	35.7
post	FSB	1200	32	NO	no		yes
post	FSB	2080	32	YES	yes	referred	yes	36.4
post	FSB	1600	32	YES	yes	referred	yes	36.4
post	FSB	2300	32	NO	no	referred	yes
post	FSB	1300	32	NO	no	referred	yes
post	FSB	1600	32	NO	no	referred	yes
post	FSB	1100	32	NO	no	inborn	yes
post	FSB	1400	32	YES	yes	inborn	yes	36.5
post	FSB	1400	32	YES	yes	inborn	yes	36.5
post	FSB	2000	32	NO	no	inborn	yes
post	FSB	1500	32	YES	yes	referred	yes	36.4
post	FSB	1200	32	NO	no	inborn	yes
post	FSB	1800	32	YES	yes	inborn	yes	36.5
post	FSB	2100	32	NO	no	referred	yes
post	FSB	2300	32	NO	no	referred	yes
post	FSB	1550	32	NO	no	inborn	yes
post	FSB	1800	32	NO	no	referred	yes
post	FSB	1750	32	YES	yes	inborn	yes	36.5
post	FSB	1250	32	NO	no		yes
post	FSB	1700	32	NO	no	referred	yes
post	FSB	2000	32	NO	no	referred	yes
post	FSB	1600	32	NO	no	referred	yes
post	FSB	1030	32	NO	no	referred	yes
post	FSB	2000	32	NO	yes	referred	yes
post	FSB	1600	32	YES	no	referred	yes
post	FSB	1270	32	YES	no	inborn	yes
post	FSB	1400	32	YES	yes	referred	yes
post	FSB	1500	32	YES	yes	inborn	yes
post	FSB	1600	32	YES	no	referred	yes
post	FSB	800	32	YES	no	referred	yes
post	FSB	1900	32	NO	no	referred	yes
post	FSB	1200	32	NO	yes	referred	yes
post	FSB	1500	32	NO	no	referred	yes
post	FSB	1800	32	NO	no	referred	yes
post	FSB	1100	32	YES	no	inborn	yes
post	SURVIVED	2200	33	NO	yes	referred	yes	37.3
post	SURVIVED	2260	33	NO	yes		yes	36.6
post	SURVIVED	1400	33	NO	yes		yes	36.4
post	SURVIVED	1700	33	NO	yes		yes	36.5
post	SURVIVED	1250	33	NO	yes	referred	yes	36.3
post	SURVIVED	1200	33	NO	yes	inborn	yes	36.8
post	SURVIVED	2800	33	YES	yes		yes	37.1
post	SURVIVED	1900	33	YES	yes		yes	36.8
post	SURVIVED	1900	33	YES	yes	inborn	yes	36.5
post	SURVIVED	1950	33	YES	no		yes	37.4
post	SURVIVED	2350	33	YES	no		yes	36.6
post	SURVIVED	1400	33	YES	no	inborn	yes	36.6
post	SURVIVED	2000	33	YES	no	referred	yes	37
post	SURVIVED	2100	33	YES	no	referred	yes	36.5
post	SURVIVED	1210	33	YES	no	inborn	yes	36.6
post	SURVIVED	2400	33	YES	no		yes	35.7
post	SURVIVED	1750	33	YES	no	referred	yes	36.2
post	SURVIVED	2720	33	YES	no	referred	yes	37.1
post	SURVIVED	2350	33	YES	no	inborn	yes	36.9
post	SURVIVED	2200	33	YES	yes	referred	yes	36.7
post	SURVIVED	2000	33	YES	no	inborn	yes	35.9
post	SURVIVED	1200	33	YES	no	referred	yes	36.5
post	SURVIVED	1260	33	YES	no	referred	yes	37.2
post	SURVIVED	2600	33	YES	no	referred	yes	36.3
post	SURVIVED	1250	33	YES	yes		yes	36.2
post	SURVIVED	2100	33	YES	yes		yes	36.8
post	SURVIVED	1950	33	YES	yes	referred	yes	36.5
post	SURVIVED	2200	33	YES	yes	referred	yes	37.2
post	SURVIVED	2000	33	NO	yes	referred	yes	36
post	SURVIVED	1200	33	YES	yes	referred	yes	36.2
post	SURVIVED	1500	33	YES	yes		yes	36.9
post	SURVIVED	1750	33	NO	yes		yes	36.2
post	SURVIVED	2100	33	YES	yes		yes	35.8
post	SURVIVED	1200	33	YES	yes		yes	35.9
post	SURVIVED	1700	33	YES	yes	inborn	yes	36.1
post	SURVIVED	1350	33	YES	yes	referred	yes	36.1
post	SURVIVED	1650	33	NO	yes		yes	37.1
post	SURVIVED	2000	33	YES	yes	inborn	yes	36.8
post	SURVIVED	1000	33	YES	yes		yes	36.3
post	SURVIVED	2600	33	YES	yes		yes	37.2
post	SURVIVED	1300	33	YES	yes	referred	yes	36.8
post	SURVIVED	2600	33	YES	yes	referred	yes	35.6
post	SURVIVED	2200	33	YES	yes	referred	yes	37.2
post	SURVIVED	1800	33	YES	yes	referred	yes	36.6
post	SURVIVED	1700	33	NO	yes	inborn	yes	36.4
post	SURVIVED	1200	33	YES	yes		yes	36.3
post	SURVIVED	2050	33	YES	yes	referred	yes	37.1
post	SURVIVED	1200	33	YES	yes		yes	35.8
post	SURVIVED	1700	33	NO	yes		yes	36.7
post	SURVIVED	1500	33	YES	yes	referred	yes	37
post	SURVIVED	1300	33	YES	yes	referred	yes	36.2
post	SURVIVED	2430	33	NO	yes		yes	36.6
post	SURVIVED	1550	33	YES	yes	inborn	yes	37.2
post	SURVIVED	2150	33	YES	yes		yes	35.9
post	SURVIVED	2100	33	YES	yes		yes	37.1
post	SURVIVED	1800	33	YES	yes	referred	yes	35.9
post	SURVIVED	1950	33	YES	yes	referred	yes	36.2
post	SURVIVED	2300	33	YES	yes	inborn	yes	36.9
post	SURVIVED	1160	33	YES	yes	referred	yes	36.5
post	SURVIVED	1250	33	NO	yes	referred	yes	36.4
post	SURVIVED	1800	33	YES	yes		yes	36.1
post	SURVIVED	1800	33	YES	yes		yes	36.5
post	SURVIVED	1900	33	YES	yes	referred	yes	37.1
post	SURVIVED	1360	33	YES	yes	referred	yes	36.4
post	SURVIVED	2400	33	YES	yes		yes	36.7
post	SURVIVED	1500	33	YES	yes	inborn	yes	36.3
post	SURVIVED	1400	33	YES	yes		yes	36.8
post	SURVIVED	1500	33	YES	yes		yes	35.9
post	SURVIVED	1800	33	YES	yes	inborn	yes	36.6
post	SURVIVED	1200	33	NO	yes	inborn	yes	36.2
post	SURVIVED	3400	33	YES	yes	referred	yes	36.6
post	SURVIVED	1400	33	YES	yes		yes	37.1
post	SURVIVED	2300	33	YES	yes	inborn	yes	36.8
post	SURVIVED	2300	33	YES	yes		yes	36.7
post	SURVIVED	1800	33	YES	yes	referred	yes	37.1
post	SURVIVED	1300	33	YES	yes	inborn	yes	36.2
post	SURVIVED	1200	33	YES	yes	referred	yes	36.2
post	SURVIVED	2500	33	YES	yes	referred	yes	36.8
post	SURVIVED	1250	33	YES	yes	referred	yes	35.9
post	SURVIVED	1800	33	YES	yes	referred	yes	35.9
post	SURVIVED	2000	33	YES	yes	inborn	yes	36
post	SURVIVED	1900	33	YES	yes	inborn	yes	35.8
post	SURVIVED	2150	33	YES	yes	inborn	yes	36.5
post	SURVIVED	1650	33	YES	yes	inborn	yes	35.8
post	SURVIVED	1900	33	YES	yes	inborn	yes	35
post	SURVIVED	1500	33	YES	yes	referred	yes
post	SURVIVED	1400	33	YES	yes	inborn	yes	35.9
post	SURVIVED	2100	33	YES	yes	referred	yes	35.8
post	SURVIVED	1500	33	YES	yes	referred	yes	36.1
post	SURVIVED	1900	33	YES	yes	referred	yes	36
post	SURVIVED	2300	33	YES	yes	inborn	yes	36
post	SURVIVED	2000	33	YES	yes	inborn	yes	36.1
post	SURVIVED	2150	33	YES	yes	referred	yes	35.8
post	SURVIVED	1800	33	NO	yes	referred	yes	36.7
post	SURVIVED	2020	33	YES	yes	referred	yes	36.6
post	SURVIVED	2000	33	YES	yes	inborn	yes	36.1
post	SURVIVED	2000	33	YES	yes	referred	yes	36.3
post	SURVIVED	2300	33	YES	yes	referred	yes	36.1
post	SURVIVED	1400	33	NO	yes	referred	yes	36
post	SURVIVED	2150	33	NO	yes	inborn	yes	36.4
post	SURVIVED	2400	33	YES	yes	referred	yes	36.3
post	SURVIVED	2450	33	YES	yes	inborn	yes	36.8
post	SURVIVED	2420	33	YES	yes	referred	yes	36.6
post	SURVIVED	1400	33	YES	yes	referred	yes	36.8
post	SURVIVED	2000	33	YES	yes	referred	yes	36.7
post	SURVIVED	2000	33	YES	yes	referred	yes	36.8
post	SURVIVED	1600	33	YES	yes	referred	yes	36.7
post	SURVIVED	1750	33	YES	yes	referred	yes	36.3
post	SURVIVED	2000	33	YES	yes	referred	yes	36.8
post	SURVIVED	1900	33	NO	yes	referred	yes	36.8
post	SURVIVED	1700	33	YES	yes	referred	yes	37
post	SURVIVED	1200	33	YES	yes	inborn	yes	36.5
post	SURVIVED	1500	33	YES	yes		yes	37
post	SURVIVED	2200	33	YES	yes	referred	yes	36.9
post	SURVIVED	1600	33	YES	yes	inborn	yes	36.3
post	SURVIVED	1320	33	YES	yes	referred	yes	37.2
post	SURVIVED	1850	33	YES	yes	inborn	yes	36.6
post	SURVIVED	1550	33	YES	yes	referred	yes	36.1
post	SURVIVED	1600	33	YES	yes	referred	yes	36
post	SURVIVED	1700	33	YES	yes	inborn	yes	36.8
post	SURVIVED	2150	33	YES	yes	referred	yes	36.8
post	SURVIVED	1400	33	YES	yes	inborn	yes	36.2
post	SURVIVED	2100	33	YES	yes	referred	yes	36.8
post	SURVIVED	1950	33	YES	yes	inborn	yes	36.1
post	SURVIVED	1850	33	YES	yes	inborn	yes	36
[truncated: 1,971 more rows]
